# Supplementary material for: An atypical DYRK kinase connects quorum-sensing with posttranscriptional gene regulation in Trypanosoma brucei
Source: eLife journal article supplement (doi:10.7554/elife.51620), 2020-03-26
Supplement: supp [file elife_poa_e51620_Supplementary_file_6.xlsx]

## Sheet: Sheet1
Reagent type (species) or resource	Designation	Source or reference	Identifiers	Additional information
Antibody	Anti-digoxinegin-AP Fab fragments	Roche	Cat# 11093274910	Sheep polyclonal, dilution according to manufacturer instruction
Antibody	Anti-Ty1 epitope tag specific BB2 antibody	Bastin et al., 1996; hybridoma cell line a gift of Keith Gull, Oxford University/available through Thermofisher	Cat#MA5-23513; RRID:AB_2610644	Hybrydome mouse monoclonal, clone BB2, WB (1:20), IF (1:5)
Antibody	Anti-Mouse AlexaFluor 488	molecular probes	Cat# A1101	Goat polyclonal, IF (1:500)
Antibody	Anti-Mouse AlexaFluor 568	abcam	Cat# ab175701	Goat polyclonal, IF (1:500)
Antibody	Anti-Rabbit AlexaFluor 488	invitrogen	Cat# A1108	Goat polyclonal, IF (1:500)
Antibody	Anti-Rabbit AlexaFluor 568	invitrogen	Cat# A11036	Goat polyclonal, IF (1:500)
Antibody	IRDye 680 anti-mouse secondary antibody	Li-Cor	Cat#P/N 925-68070; RRID:AB_2651128	Goat polyclonal, IF (1:5000)
Antibody	IRDye 800CW anti-Mouse IgG (H + L) secondary antibody	Li-Cor	Cat#P/N 925-32210; RRID:AB_2687825	Goat polyclonal, IF (1:5000)
Antibody	Anti-PAD1	Dean et al., 2009	N/A	Rabbit polyclonal, WB (1:1000), IF (1:1000)
Antibody	Anti-Thio-phosphate ester [51-8]	abcam	Cat# ab92570	Rabbit monoclonal, clone 51-8, WB (1:1000)
cell line (Spodoptera frugiperda)	SF9 insect cells	gibco	Cat# 12659017
cell line (Trypanosoma brucei)	Trypanosoma brucei EATRO 1125 AnTat1.1 90:13	Engstler and Boshart, 2004	N/A
cell line (Trypanosoma brucei)	Trypanosoma brucei EATRO 1125 AnTat1.1 J1339	Rojas et al., 2019	N/A
Commercial assay, kit	DIG RNA labelling kit (SP6/T7)	Roche	Cat# 11175025910
Commercial assay, kit	Dneasy Blood & Tissue kit	Qiagen	Cat# 69506
Commercial assay, kit	Luna Universal qPCR master mix	NEB	Cat# M3003L
Commercial assay, kit	Monarch DNA Gel extraction kit	NEB	Cat# T1020L
Commercial assay, kit	Monarch PCR DNA Cleanup kit	NEB	Cat# T1030S
Commercial assay, kit	Quickchange II site directed mutagenesis kit	Agilent	Cat#200523
Commercial assay, kit	Rapid DNA ligation kit	invitrogen	Cat# K1423
Commercial assay, kit	RNeasy mini kit	Qiagen	Cat# 74106
Commercial assay, kit	Zero blunt TOPO PCR cloning kit	invitrogen	Cat# 45-0245
gene (trypanosoma brucei)	bilobe region protein, putative	Hu et al., 2015	Tb927.11.15140
gene (trypanosoma brucei)	hypothetical protein	N/A	Tb927.1.4280
gene (trypanosoma brucei)	hypothetical protein	N/A	Tb927.4.2750
gene (trypanosoma brucei)	Not5	Schwede et al., 2008	Tb927.3.1920
gene (trypanosoma brucei)	TbDYRK (formely YAK)	Mony et al., 2014	Tb927.10.15020
gene (trypanosoma brucei)	ZC3H20	Liu et al., 2019	Tb927.7.2660
Other	[g-32P]-ATP (3000 Ci/mmol)	Perkin Elmer	Cat# NEG502A250UC
Other	8-(4-Chlorophenylthio)adenosine 3′,5′-cyclic monophosphate sodium salt	Sigma-aldrich	Cat# C3912
Other	Amaxa basic parasite nucleofector kit 2 solution	Lonza	Cat#VMI-1021
Other	ATP-gamma-S	Abcam	Cat# ab18911
Other	CDP star	Roche	Cat# 11685627001
Other	Cellfectin® II Reagent	gibco	Cat# 10362100
Other	DE52	Whatman	Cat# 4057200
Other	Dyneabeads protein G	Invitrogen	Cat# 10003D
Other	Grace’s Medium	gibco	Cat# 11595-030
Other	HMI-9 Medium	Life Technologies	Cat#074-90915
Other	MOPS	sigma aldrich	Cat# M3183
Other	NuPAGE 4-12% Bis-Tris Gel	invitrogen	Cat# NP0322BOX
Other	NuPAGE MES SDS running buffer (20x)	invitrogen	Cat# NP0002
Other	Oligo dT(20) Primer	Invitrogen	Cat# 18418020
Other	Paraformaldehyde	sigma aldrich	Cat# P6148
Other	Phire green hot start II DNA polymerase	thermo scientific	Cat# F-124S
Other	PNBM (p-Nitrobenzyl mesylate) in DMSO	abcam	Cat# ab138910
Other	ProLong Diamond antifade mount	invitrogen	Cat# P36965
Other	Protease inhibitor cocktail completme EDTA-free	Roche	Cat# 11873580001
Other	RNAse H	NEB	Cat# M0297S
Other	SDM-79 medium	Life Technologies	Cat#074-90916
Other	Sf-900 1.3X	gibco	Cat# 10967-032
Other	Sf-900 II SFM medium	gibco	Cat# 10902-096
Other	Superscript III reverse transcriptase	Invitrogen	Cat# 18080-044
Peptide, recombinant protein	Beta-Casein	Sigma-aldrich	Cat# C6905-250MG
Peptide, recombinant protein	Casein-dephosphorylated	Sigma-aldrich	Cat# C4032-100MG
Peptide, recombinant protein	Caspase 9, 200 first amino acids	Cloud-clone corp.	Cat# RPA627Mu01
Peptide, recombinant protein	Histone H1	Milipore	Cat# 14-155
Peptide, recombinant protein	Histones cores H2A, 2B, 3, 4	BioVision	Cat# 7677-50
Peptide, recombinant protein	MBP-dephosphorylates	Millipore	Cat# 13-110
Recombinant DNA reagent	pALC14	Pusnik et al., 2007	N/A
Recombinant DNA reagent	pALC14_1.4280	This study	N/A	Derived from pALC14 from Pusnik et al., 2007, generated in Keith Matthews's Lab
Recombinant DNA reagent	pALC14_NOT5	This study	N/A	Derived from pALC14 from Pusnik et al., 2007, generated in Keith Matthews's Lab
Recombinant DNA reagent	pALC14_Tb927.11.15140	This study	N/A	Derived from pALC14 from Pusnik et al., 2007, generated in Keith Matthews's Lab
Recombinant DNA reagent	pALC14_Tb927.4.2750	This study	N/A	Derived from pALC14 from Pusnik et al., 2007, generated in Keith Matthews's Lab
Recombinant DNA reagent	pDEX577-Y	Kelly et al., 2007	N/A
Recombinant DNA reagent	pDEX577-Y_TbDYRK_∆I::YFP-TY	This study	N/A	Derived from pDEX577-Y from Kelly et al., 2007, generated in Keith Matthews's Lab
Recombinant DNA reagent	pDEX577-Y_TbDYRK_∆II::YFP-TY	This study	N/A	Derived from pDEX577-Y from Kelly et al., 2007, generated in Keith Matthews's Lab
Recombinant DNA reagent	pDEX577-Y_TbDYRK_∆III::YFP-TY	This study	N/A	Derived from pDEX577-Y from Kelly et al., 2007, generated in Keith Matthews's Lab
Recombinant DNA reagent	pDEX577-Y_TbDYRK_H866A_Y868F::YFP-TY	This study	N/A	Derived from pDEX577-Y from Kelly et al., 2007, generated in Keith Matthews's Lab
Recombinant DNA reagent	pDEX577-Y_TbDYRK_H866A::YFP-TY	This study	N/A	Derived from pDEX577-Y from Kelly et al., 2007, generated in Keith Matthews's Lab
Recombinant DNA reagent	pDEX577-Y_TbDYRK_K592A::YFP-TY	This study	N/A	Derived from pDEX577-Y from Kelly et al., 2007, generated in Keith Matthews's Lab
Recombinant DNA reagent	pDEX577-Y_TbDYRK_NM::YFP-TY	This study	N/A	Derived from pDEX577-Y from Kelly et al., 2007, generated in Keith Matthews's Lab
Recombinant DNA reagent	pDEX577-Y_TbDYRK_S472A::YFP-TY	This study	N/A	Derived from pDEX577-Y from Kelly et al., 2007, generated in Keith Matthews's Lab
Recombinant DNA reagent	pDEX577-Y_TbDYRK_S77A::YFP-TY	This study	N/A	Derived from pDEX577-Y from Kelly et al., 2007, generated in Keith Matthews's Lab
Recombinant DNA reagent	pDEX577-Y_TbDYRK_S856A::YFP-TY	This study	N/A	Derived from pDEX577-Y from Kelly et al., 2007, generated in Keith Matthews's Lab
Recombinant DNA reagent	pDEX577-Y_TbDYRK_S856G::YFP-TY	This study	N/A	Derived from pDEX577-Y from Kelly et al., 2007, generated in Keith Matthews's Lab
Recombinant DNA reagent	pDEX577-Y_TbDYRK_T76A::YFP-TY	This study	N/A	Derived from pDEX577-Y from Kelly et al., 2007, generated in Keith Matthews's Lab
Recombinant DNA reagent	pDEX577-Y_TbDYRK_Y868F::YFP-TY	This study	N/A	Derived from pDEX577-Y from Kelly et al., 2007, generated in Keith Matthews's Lab
Recombinant DNA reagent	pDEX577-Y_ZC3H20::YFP-TY	This study	N/A	Derived from pDEX577-Y from Kelly et al., 2007, generated in Keith Matthews's Lab
Recombinant DNA reagent	pEnT6B-Y	Kelly et al., 2007	N/A
Recombinant DNA reagent	pEnT6B-Y_UTRs_TbDYRK	This study	N/A	Derived from pEnT6B-Y from Kelly et al., 2007, generated in Keith Matthews's Lab
Recombinant DNA reagent	pEnT6P-Y	Kelly et al., 2008	N/A	Derived from pEnT6B-Y from Kelly et al., 2007, generated in Keith Matthews's Lab
Recombinant DNA reagent	pEnT6P-Y_UTRs_TbDYRK	This study	N/A	Derived from pEnT6B-Y from Kelly et al., 2007, generated in Keith Matthews's Lab
Recombinant DNA reagent	pET28a	Novagen	Cat#69864
Recombinant DNA reagent	pFASTBac1 expression vector	Invitrogen	Cat# 10360-010
Recombinant DNA reagent	pFASTBac1_TY-YFP-TY	This study	N/A	Derived from pFASTBac1 from Novagen, generated in Keith Matthews's Lab
Recombinant DNA reagent	pFASTBac1_TY-YFP-TY::TbDYRK_∆I	This study	N/A	Derived from pFASTBac1 from Novagen, generated in Keith Matthews's Lab
Recombinant DNA reagent	pFASTBac1_TY-YFP-TY::TbDYRK_∆II	This study	N/A	Derived from pFASTBac1 from Novagen, generated in Keith Matthews's Lab
Recombinant DNA reagent	pFASTBac1_TY-YFP-TY::TbDYRK_∆III	This study	N/A	Derived from pFASTBac1 from Novagen, generated in Keith Matthews's Lab
Recombinant DNA reagent	pFASTBac1_TY-YFP-TY::TbDYRK_H866A	This study	N/A	Derived from pFASTBac1 from Novagen
Recombinant DNA reagent	pFASTBac1_TY-YFP-TY::TbDYRK_H866A_Y868F	This study	N/A	Derived from pFASTBac1 from Novagen, generated in Keith Matthews's Lab
Recombinant DNA reagent	pFASTBac1_TY-YFP-TY::TbDYRK_K592A	This study	N/A	Derived from pFASTBac1 from Novagen, generated in Keith Matthews's Lab
Recombinant DNA reagent	pFASTBac1_TY-YFP-TY::TbDYRK_NM	This study	N/A	Derived from pFASTBac1 from Novagen, generated in Keith Matthews's Lab
Recombinant DNA reagent	pFASTBac1_TY-YFP-TY::TbDYRK_S472A	This study	N/A	Derived from pFASTBac1 from Novagen, generated in Keith Matthews's Lab
Recombinant DNA reagent	pFASTBac1_TY-YFP-TY::TbDYRK_S77A	This study	N/A	Derived from pFASTBac1 from Novagen, generated in Keith Matthews's Lab
Recombinant DNA reagent	pFASTBac1_TY-YFP-TY::TbDYRK_S856A	This study	N/A	Derived from pFASTBac1 from Novagen, generated in Keith Matthews's Lab
Recombinant DNA reagent	pFASTBac1_TY-YFP-TY::TbDYRK_S856G	This study	N/A	Derived from pFASTBac1 from Novagen, generated in Keith Matthews's Lab
Recombinant DNA reagent	pFASTBac1_TY-YFP-TY::TbDYRK_T76A	This study	N/A	Derived from pFASTBac1 from Novagen, generated in Keith Matthews's Lab
Recombinant DNA reagent	pFASTBac1_TY-YFP-TY::TbDYRK_Y868F	This study	N/A	Derived from pFASTBac1 from Novagen, generated in Keith Matthews's Lab
Recombinant DNA reagent	pGEMTeasy	Promega	Cat# A1360
Recombinant DNA reagent	pJ1339	Kindly provided by Dr Jack Sunter, Oxford Brookes University	N/A
Recombinant DNA reagent	pPOTv6	Kindly provided by Dr Sam Dean, Oxford University	N/A
Recombinant DNA reagent	pPOTv6_ZC3H20_T283A	This study	N/A	Derived from pPOTv6, generated in Keith Matthews's Lab
Recombinant DNA reagent	pPOTv7	Kindly provided by Dr Sam Dean, Oxford University	N/A
Recombinant DNA reagent	pTOPO PCR blunt II	invitrogen	Cat# 45-0245
Recombinant DNA reagent	pPOTv6_BLEO_BSD	This study	N/A	Derived from pPOTv6, generated in Keith Matthews's Lab
Recombinant DNA reagent	pPOTv6_BLEO_TY::ZC3H20_BSD	This study	N/A	Derived from pPOTv6, generated in Keith Matthews's Lab
Software, algorithm	Bioconductor	Bioconductor	http://www.bioconductor.org/
Software, algorithm	Blast	NCBI	https://blast.ncbi.nlm.nih.gov/Blast.cgi
Software, algorithm	ClustalXv2	Larkin et al., 2007	http://www.clustal.org/clustal2/
Software, algorithm	Eukaryotic Linear Motif resource	Dinkel et al., 2016	http://elm.eu.org/infos/about.html
Software, algorithm	GeneDB	Hertz-Fowler et al., 2004	http://www.genedb.org/Homepage
Software, algorithm	iTASSER	Yang et al., 2015	https://zhanglab.ccmb.med.umich.edu/I-TASSER/
Software, algorithm	Jalview	Waterhouse et al., 2009	N/A
Software, algorithm	LeishGEdit	Beneke et at., 2017	http://www.leishgedit.net/Home.html
Software, algorithm	MEGA7	Kumar et al., 2016	https://www.megasoftware.net
Software, algorithm	MUSCLE	Edgar, 2004	https://www.ebi.ac.uk/Tools/msa/muscle/
Software, algorithm	OrthoMCL	Chen et al., 2006	http://orthomcl.org/orthomcl/
Software, algorithm	Pfam	Finn et al., 2016	http://pfam.xfam.org
Software, algorithm	PRATT v2.1	Whelan et al., 2001	N/A
Software, algorithm	PyMol1.8	Schrödinger	https://pymol.org/2/
Software, algorithm	R	R	https://www.r-project.org/
Software, algorithm	RNAit	Redmond et al., 2003	https://dag.compbio.dundee.ac.uk/RNAit/
Software, algorithm	Rstudio	Rstudio	https://rstudio.com/
Software, algorithm	TriTrypDB	Aslett et al., 2010	http://tritrypdb.org/tritrypdb/
strain, strain background (Escherichia coli)	MAX Efficiency® DH10Bac™ chemically competent cells	gibco	Cat# 10361012
strain, strain background (Mus musculus)	Mouse MF1, female	Charles River	N/A
Transfected construct	Trypanosoma brucei EATRO 1125 AnTat1.1 90:13_RNAi_Not5	This study	N/A	Cell lines generated in Keith Matthews's Lab
Transfected construct	Trypanosoma brucei EATRO 1125 AnTat1.1 90:13_RNAi_Tb927.1.4280	This study	N/A	Cell lines generated in Keith Matthews's Lab
Transfected construct	Trypanosoma brucei EATRO 1125 AnTat1.1 90:13_RNAi_Tb927.11.15140	This study	N/A	Cell lines generated in Keith Matthews's Lab
Transfected construct	Trypanosoma brucei EATRO 1125 AnTat1.1 90:13_RNAi_Tb927.4.2750	This study	N/A	Cell lines generated in Keith Matthews's Lab
Transfected construct	Trypanosoma brucei EATRO 1125 AnTat1.1 90:13_TbDYRK_∆I	This study	N/A	Cell lines generated in Keith Matthews's Lab
Transfected construct	Trypanosoma brucei EATRO 1125 AnTat1.1 90:13_TbDYRK_∆II	This study	N/A	Cell lines generated in Keith Matthews's Lab
Transfected construct	Trypanosoma brucei EATRO 1125 AnTat1.1 90:13_TbDYRK_∆III	This study	N/A	Cell lines generated in Keith Matthews's Lab
Transfected construct	Trypanosoma brucei EATRO 1125 AnTat1.1 90:13_TbDYRK_H866A	This study	N/A	Cell lines generated in Keith Matthews's Lab
Transfected construct	Trypanosoma brucei EATRO 1125 AnTat1.1 90:13_TbDYRK_H866A_Y868F	This study	N/A	Cell lines generated in Keith Matthews's Lab
Transfected construct	Trypanosoma brucei EATRO 1125 AnTat1.1 90:13_TbDYRK_K592A	This study	N/A	Cell lines generated in Keith Matthews's Lab
Transfected construct	Trypanosoma brucei EATRO 1125 AnTat1.1 90:13_TbDYRK_KO	This study	N/A	Cell lines generated in Keith Matthews's Lab
Transfected construct	Trypanosoma brucei EATRO 1125 AnTat1.1 90:13_TbDYRK_NM	This study	N/A	Cell lines generated in Keith Matthews's Lab
Transfected construct	Trypanosoma brucei EATRO 1125 AnTat1.1 90:13_TbDYRK_S472A	This study	N/A	Cell lines generated in Keith Matthews's Lab
Transfected construct	Trypanosoma brucei EATRO 1125 AnTat1.1 90:13_TbDYRK_S77A	This study	N/A	Cell lines generated in Keith Matthews's Lab
Transfected construct	Trypanosoma brucei EATRO 1125 AnTat1.1 90:13_TbDYRK_S856A	This study	N/A	Cell lines generated in Keith Matthews's Lab
Transfected construct	Trypanosoma brucei EATRO 1125 AnTat1.1 90:13_TbDYRK_S856G	This study	N/A	Cell lines generated in Keith Matthews's Lab
Transfected construct	Trypanosoma brucei EATRO 1125 AnTat1.1 90:13_TbDYRK_T76A	This study	N/A	Cell lines generated in Keith Matthews's Lab
Transfected construct	Trypanosoma brucei EATRO 1125 AnTat1.1 90:13_TbDYRK_Y868F	This study	N/A	Cell lines generated in Keith Matthews's Lab
Transfected construct	Trypanosoma brucei EATRO 1125 AnTat1.1 J1339_ZC3H20_KO	This study	N/A	Cell lines generated in Keith Matthews's Lab
Transfected construct	Trypanosoma brucei EATRO 1125 AnTat1.1 J1339_ZC3H20_T283A/-	This study	N/A	Cell lines generated in Keith Matthews's Lab
Transfected construct	Trypanosoma brucei EATRO 1125 AnTat1.1 J1339_ZC3H20_T283A/-_pDEX577-Y-ZC3H20	This study	N/A	Cell lines generated in Keith Matthews's Lab

## Sheet: Sheet2
	130	15.52	300	3.057		31	18.9	26.25	585.9	813.75		2017.6	917.1
	130		250			28			529.2	735		2017.6	764.25
	130		250			31			585.9	813.75		2017.6	764.25
	130		250			30			567	787.5		2017.6	764.25
	120		180			31			585.9	813.75		1862.4	550.26
	120		180			30			567	787.5		1862.4	550.26
	120		180			31			585.9	813.75		1862.4	550.26
	120		180			31			585.9	813.75		1862.4	550.26
	120		180			30			567	787.5		1862.4	550.26
	120		180			31			585.9	813.75		1862.4	550.26
	130		300			30			567	787.5		2017.6	917.1
	130		300			31			585.9	813.75		2017.6	917.1
									Electricity	6898.5		23280
									Gaz	9581.25		8345.61
									Total	16479.8		31625.6		481.054
	130	18.82	300	3.942		31	23.52	26.52	729.12	822.12		2446.6	1182.6
	130		250			28			658.56	742.56		2446.6	985.5
	130		250			31			729.12	822.12		2446.6	985.5
	130		250			30			705.6	795.6		2446.6	985.5
	120		180			31			729.12	822.12		2258.4	709.56
	120		180			30			705.6	795.6		2258.4	709.56
	120		180			31			729.12	822.12		2258.4	709.56
	120		180			31			729.12	822.12		2258.4	709.56
	120		180			30			705.6	795.6		2258.4	709.56
	120		180			31			729.12	822.12		2258.4	709.56
	130		300			30			705.6	795.6		2446.6	1182.6
	130		300			31			729.12	822.12		2446.6	1182.6
									Electricity	8584.8		28230
									Gaz	9679.8		10761.7
									Total	18264.6		38991.7		572.563
	130	16.85	300	3.054		31	23.52	26.52	729.12	822.12		2190.5	916.2
	130		250			28			658.56	742.56		2190.5	763.5
	130		250			31			729.12	822.12		2190.5	763.5
	130		250			30			705.6	795.6		2190.5	763.5
	120		180			31			729.12	822.12		2022	549.72
	120		180			30			705.6	795.6		2022	549.72
	120		180			31			729.12	822.12		2022	549.72
	120		180			31			729.12	822.12		2022	549.72
	120		180			30			705.6	795.6		2022	549.72
	120		180			31			729.12	822.12		2022	549.72
	130		300			30			705.6	795.6		2190.5	916.2
	130		300			31			729.12	822.12		2190.5	916.2
									Electricity	8584.8		25275
									Gaz	9679.8		8337.42
									Total	18264.6		33612.4		518.77
