# Supplementary material for: An atypical DYRK kinase connects quorum-sensing with posttranscriptional gene regulation in Trypanosoma brucei
Source: eLife. 2020 Mar 26;9:e51620. doi: 10.7554/eLife.51620 (PMC7136023; doi:10.7554/eLife.51620)
Supplement: Supplementary file 1. [file elife-51620-supp1.xlsx]

## Sheet: primerList
Cloning into pFastBac1
OL001	Tb927.10.15020-ORF_BssHII_F	aatgcgcgcATGGACGCTGACGAGG
OL002	Tb927.10.15020-ORF_PstI_R	taactgcagCTAACGTTGTGAGTATACCTGC
OL003	TY-YFP_BamHI_SpeI_F	ggatccatgGAGGTCCATACTAACCAAGAT
OL004	TY-YFP_BssHII_R	gcgcgcCTTGTACAGCTCGTCCA
OL005	BssHII_TY_SalI_hybrid_F_Phospho5'	cgcgcGAGGTCCATACTAACCAAGATCCACTTGACTAActgca
OL006	BssHII_TY_SalI_hybrid_R_Phospho5'	gTTAGTCAAGTGGATCTTGGTTAGTATGGACCTCg
Sequencing
OL007	T7_prom_F	TAATACGACTCACTATAGGG
OL008	pGEX_seq_F	GGGCTGGCAAGCCACGTTTGGTG
OL009	pGEX_seq_R	CCGGGAGCTGCATGTGTCAGAGG
OL010	Tb927.10.15020_1	CAAGCGACGAATTACGGTGA
OL011	Tb927.10.15020_2	AACATTCGGAGGAGCTACG
OL012	Tb927.10.15020_3	TACCAACCCATACACCACTT
OL013	Tb927.10.15020_4	TACCTCCACTCTCCGATTCG
OL014	Tb927.10.15020_5	ATCACCCTCATTTCGTCTCT
OL015	SP6_prom_R	ATTTAGGTGACACTATAGAA
OL016	Tb927.7.2660_5'UTR_F	gcgtacgcgcttgaatttaca
OL017	HYG_orf_F	ATGAAAAAGCCTGAACTCACCGC
OL018	HYG_orf_R	TTCCTTTGCCCTCGGACGAG
Mutagenesis
OL019	Tb927.10.15020_K592A_R	cgcggcttttgacaaccgctacagccacaagtggtgtat
OL020	Tb927.10.15020_K592A_F	atacaccacttgtggctgtagcggttgtcaaaagccgcg
OL021	Tb927.10.15020_T76A_F	cgcatcgcagggaagtagagcgtcaccacc
OL022	Tb927.10.15020_T76A_R	ggtggtgacgctctacttccctgcgatgcg
OL023	Tb927.10.15020_S77A_F	gacaaaagaaggtggtgccgttctacttccctgcg
OL024	Tb927.10.15020_S77A_R	cgcagggaagtagaacggcaccaccttcttttgtc
OL025	Tb927.10.15020_S472A_F	cttcatgcggtggggccactactgaagttcg
OL026	Tb927.10.15020_S472A_R	cgaacttcagtagtggccccaccgcatgaag
OL027	Tb927.10.15020_H866A_F	CTTACATTGGAAAAGGAATCgcTACGTATGTACAGTCCCGC
OL028	Tb927.10.15020_H866A_R	GCGGGACTGTACATACGTAgcGATTCCTTTTCCAATGTAAG
OL029	Tb927.10.15020_Y868F_F	GGAAAAGGAATCCATACGTtTGTACAGTCCCGCTACTATC
OL030	Tb927.10.15020_Y868F_R	GATAGTAGCGGGACTGTACAaACGTATGGATTCCTTTTCC
OL031	Tb927.10.15020_H866A_Y868F_F	CTTACATTGGAAAAGGAATCgcTACGTtTGTACAGTCCCGCTACTATC
OL032	Tb927.10.15020_H866A_Y868F_R	GATAGTAGCGGGACTGTACAaACGTAgcGATTCCTTTTCCAATGTAAG
OL033	Tb927.10.15020_Δinsert_I_phospho5'_R	TCGCAAGTCCTTGCAGAGAA
OL034	Tb927.10.15020_Δinsert_I_phospho5'_F	CATACACCACTTGTGGCTGT
OL035	Tb927.10.15020_Δinsert_II_phospho5'_R	ATCTGAAAAGGACAGTGCCG
OL036	Tb927.10.15020_Δinsert_II_phospho5'_F	CATCACTGCATAGTTATGGAACGA
OL037	Tb927.10.15020_Δinsert_III_phospho5'_R	AAGCCAGGAATCGAGTGTAAT
OL038	Tb927.10.15020_Δinsert_III_phospho5'_F	AACATAAAGCTCATTGACTTTAGCAG
OL039	Tb927.10.15020_S856A_R	cttttccaatgtaagagctactggcaaagtcaatgagctttatgttcag
OL040	Tb927.10.15020_S856A_F	ctgaacataaagctcattgactttgccagtagctcttacattggaaaag
OL041	Tb927.10.15020_S856G_R	gtaagagctactgccaaagtcaatgagctttatgttcagcgg
OL042	Tb927.10.15020_S856G_F	ccgctgaacataaagctcattgactttggcagtagctcttac
OL043	YFP_erasing_PstI_F	TTCGGCTACGGCCTtCAGTGCTTCGCCCG
OL044	YFP_erasing_PstI_R	CGGGCGAAGCACTGaAGGCCGTAGCCGAA
RNAi
OL045	Tb927.4.2750_RNAi_BamHI-HindIII_F	ggatccaagcttAACTCAACACCCGGACACTC
OL046	Tb927.4.2750_RNAi_XhoI-XbaI_R	ctcgagtctagaCCTTCCGTCCACAAACTCAT
OL047	Tb927.7.3550_RNAi_BamHI-HindIII_F	ggatccaagcttCAACGCGTCTCATCGTCACG
OL048	Tb927.7.3550_RNAi_XhoI-XbaI_R	ctcgagtctagaTGAGCAGTTGTCGTCCGTGT
OL049	Tb927.1.4280_RNAi_BamHI-HindIII_F	ggatccaagcttGGCATCTGTCTCTAGCCGCA
OL050	Tb927.1.4280_RNAi_XhoI-XbaI_R	ctcgagtctagaAGCGGGTGGAGGAAACCAAA
OL051	Tb927.3.1920_RNAi_BamHI-HindIII_F	ggatccaagcttCCGGTGAGAATGGGAGGGAC
OL052	Tb927.3.1920_RNAi_XhoI-XbaI_R	ctcgagtctagaTGTGCTGTTGAAACCGGTGC
OL053	Tb927.11.15140_RNAi_BamHI-HindIII_F	ggatccaagcttCTGCAGGAGCGAAAGATGCG
OL054	Tb927.11.15140_RNAi_XhoI-XbaI_R	ctcgagtctagaAGTATATTGCCGCGGCTGGT
RT_qPCR
OL055	RT_GPI8_F	CGAAGCGCATTTGGATAGC
OL056	RT_GPI8_R	AGCGCGTGATGACAGTGAAG
OL057	RT_Tb927.10.15020_F	AATGGTCTCAACGCAGCAAC
OL058	RT_Tb927.10.15020_R	AAAAGCTGTGTGCCAATGCC
OL059	RT_YFP_F	AGCTGACCCTGAAGTTCATCTG
OL060	RT_YFP_R	AAGTCGTGCTGCTTCATGTG
CRISPR/Cas9
OL061	gRNA scaffold	aaaagcaccgactcggtgccactttttcaagttgataacggactagccttattttaacttgctatttctagctctaaaac
OL062	Tb927.7.2660_Upstream_F	GTGCAAAGAGCAACGAATAAGACTGTGAAGgtataatgcagacctgctgc
OL063	Tb927.7.2660_5'_sgRNA	gaaattaatacgactcactataggGTGACCTTAGATACAACCGAgttttagagctagaaatagc
OL064	Tb927.7.2660_Downstream_KO_R	TCCGCACGCTAAATCATAATACAAGCTCCCccggaaccactaccagaacc
OL065	Tb927.7.2660_3'_sgRNA	gaaattaatacgactcactataggACGCGCACACGCAAGCAGTAgttttagagctagaaatagc
OL066	Tb927.7.2660_SacI_R	acgGAGCTCTTAATTCCTGCCCCTCCCT
OL067	Tb927.7.2660_HindIII_F	CGCaagcttATGCAGCTCGTAGCCTCGC
OL068	Tb927.7.2660_T283A_R	ccaatcgcagcgtggcacttggagatgcc
OL069	Tb927.7.2660_T283A_F	ggcatctccaagtgccacgctgcgattgg
OL080	BleoR_a_EcoRI_F	GCAGAATTCATGGCCAAGTTGACCAGTGC
OL081	BleoR_b_NheI_F	GCTAGCGCAATGGCCAAGTTGACCAGTGC
OL082	Tb927.2660_downstream_KO_new_for reinsertion	TCCGCACGCTAAATCAAAATACAAGCTCCCTTAATTCCTGCCCCTCCCTT
Cloning into pGEX6P1
OL070	Tb927.7.3550_BamHI_F	ggatccATGTCTATATTCGGTGAACCACTTCCCCATGAGGATGAC
OL071	Tb927.7.3550_NotI_R	gcggccgcTTAGAAACCTCGCCCAACGGATGATTCGCGGTTTGTT
OL072	Tb927.1.4280_XmaI_F	agcCCCGGGAaTGGAGAAGGTAGCAACAACA
OL073	Tb927.1.4280_NotI_R	acaGCGGCCGCTCACATCACTGGTTCAACA
OL074	Tb927.7.2660_EcoRI_F	agcGAATTCATGCAGCTCGTAGCCTCGC
OL075	Tb927.7.2660_HindIII_R	acgAAGCTTTTAATTCCTGCCCCTCCCT
OL076	Tb927.3.1920_BamHI_F	agcGGATCCATGACAAATAATAAAAAGAGTC
OL077	Tb927.3.1920_SacI_R	acaGTCGACTCAACGCAGCTCATTCTC
OL078	Tb927.11.15140_BamHI_F	agcGGATCCATGTTCCAACGCCTTGACG
OL079	Tb927.11.15140_SacI_R	acgGTCGACTCATTTTCGGGGTGTCACA
