# Supplementary material for: An atypical DYRK kinase connects quorum-sensing with posttranscriptional gene regulation in Trypanosoma brucei
Source: eLife. 2020 Mar 26;9:e51620. doi: 10.7554/eLife.51620 (PMC7136023; doi:10.7554/eLife.51620)
Supplement: Supplementary file 2. — Sheet 1 KOvsWT_|FC| > 1.5_p<0.05 presents the peptides with an absolute value of FC > 1.5 and a p-value<0.05. Sheet 2 GOenrichDownKO indicate the GO term enrichment of biological functions of proteins presenting a down regulation of phosphorylation in the DYRK-/-cell line. Sheet 3 GOenrichUpKO indicate the GO term enrichment of biological functions of proteins presenting an up regulation of phosphorylation in the DYRK-/-cell line. Yellow colour indicates the proteins for which further analysis have been performed. [file elife-51620-supp2.xlsx]

## Sheet: KOvsWT_|FC|>1.5_p<0.05
accession	description	pResidue	log2FC	stat
Tb927.10.15020	>Tb927.10.15020 | organism=Trypanosoma_brucei_TREU927 | product=protein kinase, putative | location=Tb927_10_v5.1:3670629-3673916(+) | length=1095 | sequence_SO=chromosome | SO=protein_coding;>Tb11.v5.0633 | organism=Trypanosoma_brucei_TREU927 | product=pr	T76	-4.12621	0.00253338
Tb927.10.15020	>Tb927.10.15020 | organism=Trypanosoma_brucei_TREU927 | product=protein kinase, putative | location=Tb927_10_v5.1:3670629-3673916(+) | length=1095 | sequence_SO=chromosome | SO=protein_coding	Y868	-1.69399	0.00219659
Tb927.5.2390	>Tb927.5.2390 | organism=Trypanosoma_brucei_TREU927 | product=hypothetical protein, conserved | location=Tb927_05_v5.1:815287-816315(+) | length=342 | sequence_SO=chromosome | SO=protein_coding	S76	-1.45508	0.00549396
Tb927.8.6940	>Tb927.8.6940 | organism=Trypanosoma_brucei_TREU927 | product=hypothetical protein, conserved | location=Tb927_08_v5.1:2000856-2005238(+) | length=1460 | sequence_SO=chromosome | SO=protein_coding;>Tb927.4.5380 | organism=Trypanosoma_brucei_TREU927 | produ	S642	-1.44282	0.0043461
Tb927.8.3680	>Tb927.8.3680 | organism=Trypanosoma_brucei_TREU927 | product=hypothetical protein, conserved | location=Tb927_08_v5.1:1100932-1103829(-) | length=645 | sequence_SO=chromosome | SO=protein_coding	S416	-1.33784	0.00646948
Tb927.6.640	>Tb927.6.640 | organism=Trypanosoma_brucei_TREU927 | product=kinetoplastid-specific phospho-protein phosphatase, putative | location=Tb927_06_v5.1:265619-267823(-) | length=734 | sequence_SO=chromosome | SO=protein_coding	T545	-1.31608	0.00549396
Tb927.4.4530	>Tb927.4.4530 | organism=Trypanosoma_brucei_TREU927 | product=hypothetical protein, conserved | location=Tb927_04_v5.1:1243342-1246767(-) | length=1141 | sequence_SO=chromosome | SO=protein_coding	S648	-1.28767	0.00724235
Tb927.7.5940	>Tb927.7.5940 | organism=Trypanosoma_brucei_TREU927 | product=Protein Associated with Differentiation (TbPAD2) | location=Tb927_07_v5.1:1592980-1594797(+) | length=605 | sequence_SO=chromosome | SO=protein_coding	S324	-1.27577	0.0127573
Tb927.7.5940	>Tb927.7.5940 | organism=Trypanosoma_brucei_TREU927 | product=Protein Associated with Differentiation (TbPAD2) | location=Tb927_07_v5.1:1592980-1594797(+) | length=605 | sequence_SO=chromosome | SO=protein_coding	S309	-1.26845	0.00554313
Tb927.8.820	>Tb927.8.820 | organism=Trypanosoma_brucei_TREU927 | product=hypothetical protein, conserved | location=Tb927_08_v5.1:233535-236408(-) | length=553 | sequence_SO=chromosome | SO=protein_coding	S9	-1.25185	0.00646948
Tb927.9.4910	>Tb927.9.4910 | organism=Trypanosoma_brucei_TREU927 | product=protein kinase, putative | location=Tb927_09_v5.1:892236-893390(+) | length=384 | sequence_SO=chromosome | SO=protein_coding	S21	-1.22988	0.0127573
Tb927.11.15140	>Tb927.11.15140 | organism=Trypanosoma_brucei_TREU927 | product=hypothetical protein, conserved | location=Tb927_11_v5.1:4025337-4027043(-) | length=568 | sequence_SO=chromosome | SO=protein_coding	T526	-1.20534	0.00549396
Tb927.1.4310	>Tb927.1.4310 | organism=Trypanosoma_brucei_TREU927 | product=hypothetical protein, conserved | location=Tb927_01_v5.1:890927-895843(+) | length=1638 | sequence_SO=chromosome | SO=protein_coding	S294	-1.1962	0.0105318
Tb927.1.4310	>Tb927.1.4310 | organism=Trypanosoma_brucei_TREU927 | product=hypothetical protein, conserved | location=Tb927_01_v5.1:890927-895843(+) | length=1638 | sequence_SO=chromosome | SO=protein_coding	S297	-1.1962	0.0105318
Tb927.3.1620	>Tb927.3.1620 | organism=Trypanosoma_brucei_TREU927 | product=hypothetical protein, conserved | location=Tb927_03_v5.1:422391-427190(-) | length=1599 | sequence_SO=chromosome | SO=protein_coding	S307	-1.19217	0.00549396
Tb927.7.2660	>Tb927.7.2660 | organism=Trypanosoma_brucei_TREU927 | product=zinc finger protein family member, putative (ZC3H20) | location=Tb927_07_v5.1:682981-684198(-) | length=405 | sequence_SO=chromosome | SO=protein_coding	S288	-1.16568	0.00715887
Tb927.7.3970	>Tb927.7.3970 | organism=Trypanosoma_brucei_TREU927 | product=hypothetical protein, conserved | location=Tb927_07_v5.1:1039428-1040300(+) | length=290 | sequence_SO=chromosome | SO=protein_coding	S113	-1.14076	0.00549396
Tb927.11.15100	>Tb927.11.15100 | organism=Trypanosoma_brucei_TREU927 | product=Tb5.20 | location=Tb927_11_v5.1:4012859-4016171(-) | length=1083 | sequence_SO=chromosome | SO=protein_coding	T360	-1.11111	0.012512
Tb927.9.8180	>Tb927.9.8180 | organism=Trypanosoma_brucei_TREU927 | product=hypothetical protein, conserved | location=Tb927_09_v5.1:1342510-1344438(-) | length=642 | sequence_SO=chromosome | SO=protein_coding	T604	-1.10265	0.00948228
Tb927.10.14480	>Tb927.10.14480 | organism=Trypanosoma_brucei_TREU927 | product=hypothetical protein, conserved | location=Tb927_10_v5.1:3536144-3538741(-) | length=865 | sequence_SO=chromosome | SO=protein_coding	T840	-1.08606	0.00549396
Tb927.11.16470	>Tb927.11.16470 | organism=Trypanosoma_brucei_TREU927 | product=hypothetical protein, conserved | location=Tb927_11_v5.1:4365215-4367566(-) | length=783 | sequence_SO=chromosome | SO=protein_coding	S16	-1.08315	0.00938347
Tb927.11.4030	>Tb927.11.4030 | organism=Trypanosoma_brucei_TREU927 | product=hypothetical protein, conserved | location=Tb927_11_v5.1:1178385-1183406(+) | length=1673 | sequence_SO=chromosome | SO=protein_coding	T216	-1.0799	0.00724235
Tb927.4.4880	>Tb927.4.4880 | organism=Trypanosoma_brucei_TREU927 | product=hypothetical protein, conserved | location=Tb927_04_v5.1:1333284-1335866(-) | length=860 | sequence_SO=chromosome | SO=protein_coding	T453	-1.05186	0.0129005
Tb927.4.4230	>Tb927.4.4230 | organism=Trypanosoma_brucei_TREU927 | product=RNA-binding protein, putative (RBP31) | location=Tb927_04_v5.1:1119092-1121359(-) | length=755 | sequence_SO=chromosome | SO=protein_coding	S586	-1.04301	0.00549396
Tb927.8.3840	>Tb927.8.3840 | organism=Trypanosoma_brucei_TREU927 | product=hypothetical protein, conserved | location=Tb927_08_v5.1:1142757-1144982(-) | length=741 | sequence_SO=chromosome | SO=protein_coding	S290	-1.04254	0.0149491
Tb927.11.6400	>Tb927.11.6400 | organism=Trypanosoma_brucei_TREU927 | product=kinesin, putative | location=Tb927_11_v5.1:1797870-1800830(-) | length=986 | sequence_SO=chromosome | SO=protein_coding	T902	-1.01323	0.00646948
Tb927.10.15700	>Tb927.10.15700 | organism=Trypanosoma_brucei_TREU927 | product=hypothetical protein, conserved | location=Tb927_10_v5.1:3854999-3865357(+) | length=3452 | sequence_SO=chromosome | SO=protein_coding	S130	-1.00767	0.028323
Tb927.1.5000	>Tb927.1.5000 | organism=Trypanosoma_brucei_TREU927 | product=hypothetical protein, conserved | location=Tb927_01_v5.1:1004277-1005123(+) | length=271 | sequence_SO=chromosome | SO=protein_coding	T10	-1.00604	0.00938347
Tb927.10.2930	>Tb927.10.2930 | organism=Trypanosoma_brucei_TREU927 | product=hypothetical protein, conserved | location=Tb927_10_v5.1:761087-763336(+) | length=749 | sequence_SO=chromosome | SO=protein_coding	T393	-0.999015	0.00938347
Tb927.2.5200	>Tb927.2.5200 | organism=Trypanosoma_brucei_TREU927 | product=hypothetical protein, conserved | location=Tb927_02_v5.1:915171-917198(+) | length=675 | sequence_SO=chromosome | SO=protein_coding	S637	-0.997852	0.00646948
Tb927.2.4280	>Tb927.2.4280 | organism=Trypanosoma_brucei_TREU927 | product=kinetoplastid-specific dual specificity phosphatase, putative | location=Tb927_02_v5.1:759384-763151(-) | length=1042 | sequence_SO=chromosome | SO=protein_coding	S886	-0.997828	0.0267168
Tb927.1.4310	>Tb927.1.4310 | organism=Trypanosoma_brucei_TREU927 | product=hypothetical protein, conserved | location=Tb927_01_v5.1:890927-895843(+) | length=1638 | sequence_SO=chromosome | SO=protein_coding	S438	-0.989057	0.0129005
Tb927.9.6730	>Tb927.9.6730 | organism=Trypanosoma_brucei_TREU927 | product=hypothetical protein, conserved | location=Tb927_09_v5.1:1107187-1108188(+) | length=333 | sequence_SO=chromosome | SO=protein_coding	S183	-0.985398	0.00724235
Tb927.2.4060	>Tb927.2.4060 | organism=Trypanosoma_brucei_TREU927 | product=dynein intermediate chain IC 138, putative | location=Tb927_02_v5.1:714910-717552(-) | length=864 | sequence_SO=chromosome | SO=protein_coding	S30	-0.981987	0.0272224
Tb927.2.4280	>Tb927.2.4280 | organism=Trypanosoma_brucei_TREU927 | product=kinetoplastid-specific dual specificity phosphatase, putative | location=Tb927_02_v5.1:759384-763151(-) | length=1042 | sequence_SO=chromosome | SO=protein_coding	T406	-0.974703	0.00549396
Tb927.11.5870	>Tb927.11.5870 | organism=Trypanosoma_brucei_TREU927 | product=hypothetical protein, conserved | location=Tb927_11_v5.1:1665452-1666744(+) | length=430 | sequence_SO=chromosome | SO=protein_coding	S96	-0.971377	0.00549396
Tb927.4.420	>Tb927.4.420 | organism=Trypanosoma_brucei_TREU927 | product=phosphatidylinositol 3-kinase (tor2) (TOR2) | location=Tb927_04_v5.1:119948-127186(-) | length=2412 | sequence_SO=chromosome | SO=protein_coding	S1389	-0.965914	0.0210363
Tb927.7.3980	>Tb927.7.3980 | organism=Trypanosoma_brucei_TREU927 | product=immunodominant antigen, putative,tc40 antigen-like | location=Tb927_07_v5.1:1047000-1049714(+) | length=904 | sequence_SO=chromosome | SO=protein_coding	T480	-0.960302	0.0241425
Tb927.7.180	>Tb927.7.180 | organism=Trypanosoma_brucei_TREU927 | product=hypothetical protein | location=Tb927_07_v5.1:27107-28420(-) | length=437 | sequence_SO=chromosome | SO=protein_coding	T184	-0.94983	0.00549396
Tb927.1.4310	>Tb927.1.4310 | organism=Trypanosoma_brucei_TREU927 | product=hypothetical protein, conserved | location=Tb927_01_v5.1:890927-895843(+) | length=1638 | sequence_SO=chromosome | SO=protein_coding	S443	-0.927446	0.0320758
Tb927.9.1970	>Tb927.9.1970 | organism=Trypanosoma_brucei_TREU927 | product=syntaxin binding protein 1, putative | location=Tb927_09_v5.1:445805-447733(-) | length=642 | sequence_SO=chromosome | SO=protein_coding	S547	-0.925467	0.0158872
Tb927.11.3280	>Tb927.11.3280 | organism=Trypanosoma_brucei_TREU927 | product=kinesin, putative,MCAK-like kinesin, putative (Kif13-5) | location=Tb927_11_v5.1:951904-954063(+) | length=719 | sequence_SO=chromosome | SO=protein_coding	S548	-0.918796	0.0183968
Tb927.10.460	>Tb927.10.460 | organism=Trypanosoma_brucei_TREU927 | product=NIMA-related protein kinase (NRKC) | location=Tb927_10_v5.1:119555-121849(+) | length=764 | sequence_SO=chromosome | SO=protein_coding	S628	-0.915943	0.00900719
Tb927.9.5260	>Tb927.9.5260 | organism=Trypanosoma_brucei_TREU927 | product=hypothetical protein, conserved | location=Tb927_09_v5.1:925543-927009(+) | length=488 | sequence_SO=chromosome | SO=protein_coding	S438	-0.912627	0.0129005
Tb927.11.3120	>Tb927.11.3120 | organism=Trypanosoma_brucei_TREU927 | product=nucleolar GTP-binding protein 1 (NOG1) | location=Tb927_11_v5.1:888200-890167(-) | length=655 | sequence_SO=chromosome | SO=protein_coding	S582	-0.909118	0.0112152
Tb927.1.4310	>Tb927.1.4310 | organism=Trypanosoma_brucei_TREU927 | product=hypothetical protein, conserved | location=Tb927_01_v5.1:890927-895843(+) | length=1638 | sequence_SO=chromosome | SO=protein_coding	T441	-0.908008	0.0230697
Tb927.7.4910	>Tb927.7.4910 | organism=Trypanosoma_brucei_TREU927 | product=hypothetical protein, conserved | location=Tb927_07_v5.1:1294355-1295464(-) | length=369 | sequence_SO=chromosome | SO=protein_coding;>Tb11.v5.0172 | organism=Trypanosoma_brucei_TREU927 | produc	S350	-0.904325	0.00715887
Tb927.3.1030	>Tb927.3.1030 | organism=Trypanosoma_brucei_TREU927 | product=RNA-binding protein (RPB28) | location=Tb927_03_v5.1:253218-254291(+) | length=357 | sequence_SO=chromosome | SO=protein_coding	S244	-0.901064	0.0127573
Tb927.4.2990	>Tb927.4.2990 | organism=Trypanosoma_brucei_TREU927 | product=hypothetical protein, conserved | location=Tb927_04_v5.1:791219-795088(+) | length=1289 | sequence_SO=chromosome | SO=protein_coding;>Tb11.v5.0968 | organism=Trypanosoma_brucei_TREU927 | product	S661	-0.880684	0.0226942
Tb927.4.2990	>Tb927.4.2990 | organism=Trypanosoma_brucei_TREU927 | product=hypothetical protein, conserved | location=Tb927_04_v5.1:791219-795088(+) | length=1289 | sequence_SO=chromosome | SO=protein_coding;>Tb11.v5.0968 | organism=Trypanosoma_brucei_TREU927 | product	T660	-0.880684	0.0226942
Tb927.11.16610	>Tb927.11.16610 | organism=Trypanosoma_brucei_TREU927 | product=hypothetical protein, conserved | location=Tb927_11_v5.1:4410744-4412594(-) | length=616 | sequence_SO=chromosome | SO=protein_coding	T237	-0.878917	0.017641
Tb927.3.4180	>Tb927.3.4180 | organism=Trypanosoma_brucei_TREU927 | product=hypothetical protein | location=Tb927_03_v5.1:1172565-1173791(-) | length=408 | sequence_SO=chromosome | SO=protein_coding	T302	-0.876128	0.00593334
Tb927.11.1360	>Tb927.11.1360 | organism=Trypanosoma_brucei_TREU927 | product=hypothetical protein, conserved | location=Tb927_11_v5.1:394933-396639(+) | length=568 | sequence_SO=chromosome | SO=protein_coding	S226	-0.875903	0.0223725
Tb927.3.5250	>Tb927.3.5250 | organism=Trypanosoma_brucei_TREU927 | product=ZFP family member, putative (ZC3H8) | location=Tb927_03_v5.1:1473439-1475178(+) | length=579 | sequence_SO=chromosome | SO=protein_coding	T324	-0.862723	0.0312124
Tb927.3.980	>Tb927.3.980 | organism=Trypanosoma_brucei_TREU927 | product=hypothetical protein, conserved | location=Tb927_03_v5.1:240544-242646(+) | length=700 | sequence_SO=chromosome | SO=protein_coding	S674	-0.859094	0.0127573
Tb927.11.710	>Tb927.11.710 | organism=Trypanosoma_brucei_TREU927 | product=hypothetical protein, conserved | location=Tb927_11_v5.1:172346-173551(-) | length=401 | sequence_SO=chromosome | SO=protein_coding;>Tb11.0850 | organism=Trypanosoma_brucei_TREU927 | product=hyp	S69	-0.857079	0.0231325
Tb927.11.13260.1	>Tb927.11.13260.1 | organism=Trypanosoma_brucei_TREU927 | product=unspecified product | location=Tb927_11_v5.1:3554728-3556011(-) | length=310 | sequence_SO=chromosome | SO=protein_coding;>Tb927.11.13260.2 | organism=Trypanosoma_brucei_TREU927 | product=un	T9	-0.852574	0.0172745
Tb927.8.7580	>Tb927.8.7580 | organism=Trypanosoma_brucei_TREU927 | product=hypothetical protein, conserved | location=Tb927_08_v5.1:2183282-2185903(+) | length=873 | sequence_SO=chromosome | SO=protein_coding	S594	-0.845267	0.0112152
Tb927.11.2860	>Tb927.11.2860 | organism=Trypanosoma_brucei_TREU927 | product=hypothetical protein, conserved | location=Tb927_11_v5.1:841348-843657(-) | length=769 | sequence_SO=chromosome | SO=protein_coding	S198	-0.844287	0.045264
Tb927.11.16610	>Tb927.11.16610 | organism=Trypanosoma_brucei_TREU927 | product=hypothetical protein, conserved | location=Tb927_11_v5.1:4410744-4412594(-) | length=616 | sequence_SO=chromosome | SO=protein_coding	T51	-0.838319	0.0230697
Tb927.1.4480	>Tb927.1.4480 | organism=Trypanosoma_brucei_TREU927 | product=hypothetical protein, conserved | location=Tb927_01_v5.1:923539-927993(+) | length=1484 | sequence_SO=chromosome | SO=protein_coding	S1091	-0.838131	0.017641
Tb927.8.2350	>Tb927.8.2350 | organism=Trypanosoma_brucei_TREU927 | product=hypothetical protein, conserved | location=Tb927_08_v5.1:704489-705568(+) | length=359 | sequence_SO=chromosome | SO=protein_coding	S31	-0.836435	0.0112152
Tb927.11.6400	>Tb927.11.6400 | organism=Trypanosoma_brucei_TREU927 | product=kinesin, putative | location=Tb927_11_v5.1:1797870-1800830(-) | length=986 | sequence_SO=chromosome | SO=protein_coding	T734	-0.834886	0.0127573
Tb927.8.1540	>Tb927.8.1540 | organism=Trypanosoma_brucei_TREU927 | product=hypothetical protein, conserved | location=Tb927_08_v5.1:499315-501987(+) | length=890 | sequence_SO=chromosome | SO=protein_coding	S644	-0.834753	0.0141521
Tb927.11.11770	>Tb927.11.11770 | organism=Trypanosoma_brucei_TREU927 | product=eukaryotic translation initiation factor 4e, putative | location=Tb927_11_v5.1:3155592-3156920(+) | length=442 | sequence_SO=chromosome | SO=protein_coding	S126	-0.833996	0.00783845
Tb927.11.3280	>Tb927.11.3280 | organism=Trypanosoma_brucei_TREU927 | product=kinesin, putative,MCAK-like kinesin, putative (Kif13-5) | location=Tb927_11_v5.1:951904-954063(+) | length=719 | sequence_SO=chromosome | SO=protein_coding	T102	-0.829345	0.0470322
Tb927.2.4060	>Tb927.2.4060 | organism=Trypanosoma_brucei_TREU927 | product=dynein intermediate chain IC 138, putative | location=Tb927_02_v5.1:714910-717552(-) | length=864 | sequence_SO=chromosome | SO=protein_coding	T154	-0.823465	0.00894618
Tb927.7.5250	>Tb927.7.5250 | organism=Trypanosoma_brucei_TREU927 | product=hypothetical protein, conserved | location=Tb927_07_v5.1:1389540-1391732(+) | length=730 | sequence_SO=chromosome | SO=protein_coding	S316	-0.820417	0.0135344
Tb927.11.10520	>Tb927.11.10520 | organism=Trypanosoma_brucei_TREU927 | product=protein kinase, putative,tyrosine kinase, putative | location=Tb927_11_v5.1:2798813-2802595(+) | length=1260 | sequence_SO=chromosome | SO=protein_coding	S856	-0.81377	0.00998674
Tb927.9.4760	>Tb927.9.4760 | organism=Trypanosoma_brucei_TREU927 | product=hypothetical protein, conserved | location=Tb927_09_v5.1:867972-870056(+) | length=350 | sequence_SO=chromosome | SO=protein_coding	T91	-0.809242	0.0147349
Tb927.1.5000	>Tb927.1.5000 | organism=Trypanosoma_brucei_TREU927 | product=hypothetical protein, conserved | location=Tb927_01_v5.1:1004277-1005123(+) | length=271 | sequence_SO=chromosome | SO=protein_coding	S176	-0.805414	0.00938347
Tb927.11.2500	>Tb927.11.2500 | organism=Trypanosoma_brucei_TREU927 | product=carboxypeptidase, putative,metallo-peptidase, Clan MA(E) Family M32 | location=Tb927_11_v5.1:735908-737419(-) | length=503 | sequence_SO=chromosome | SO=protein_coding	S197	-0.804978	0.00715403
Tb927.11.16610	>Tb927.11.16610 | organism=Trypanosoma_brucei_TREU927 | product=hypothetical protein, conserved | location=Tb927_11_v5.1:4410744-4412594(-) | length=616 | sequence_SO=chromosome | SO=protein_coding	S23	-0.802634	0.00938347
Tb927.2.3580	>Tb927.2.3580 | organism=Trypanosoma_brucei_TREU927 | product=transcription elongation factor s-II, putative (TFIIS2-1) | location=Tb927_02_v5.1:638619-640022(-) | length=467 | sequence_SO=chromosome | SO=protein_coding	S282	-0.798352	0.0333124
Tb927.10.1150	>Tb927.10.1150 | organism=Trypanosoma_brucei_TREU927 | product=hypothetical protein, conserved | location=Tb927_10_v5.1:306839-309841(-) | length=1000 | sequence_SO=chromosome | SO=protein_coding;>Tb11.0540 | organism=Trypanosoma_brucei_TREU927 | product=c	S440	-0.793169	0.00704461
Tb927.1.4310	>Tb927.1.4310 | organism=Trypanosoma_brucei_TREU927 | product=hypothetical protein, conserved | location=Tb927_01_v5.1:890927-895843(+) | length=1638 | sequence_SO=chromosome | SO=protein_coding	S178	-0.792553	0.0310995
Tb927.10.14770	>Tb927.10.14770 | organism=Trypanosoma_brucei_TREU927 | product=protein kinase, putative | location=Tb927_10_v5.1:3600652-3602574(-) | length=640 | sequence_SO=chromosome | SO=protein_coding	T414	-0.790392	0.0137165
Tb927.1.1820	>Tb927.1.1820 | organism=Trypanosoma_brucei_TREU927 | product=hypothetical protein, conserved | location=Tb927_01_v5.1:470272-471417(+) | length=381 | sequence_SO=chromosome | SO=protein_coding	S63	-0.785708	0.00938347
Tb927.10.970	>Tb927.10.970 | organism=Trypanosoma_brucei_TREU927 | product=hypothetical protein, conserved | location=Tb927_10_v5.1:262544-267814(+) | length=1756 | sequence_SO=chromosome | SO=protein_coding	S334	-0.78185	0.0165217
Tb927.1.4280	>Tb927.1.4280 | organism=Trypanosoma_brucei_TREU927 | product=hypothetical protein, conserved | location=Tb927_01_v5.1:881086-883182(+) | length=698 | sequence_SO=chromosome | SO=protein_coding	T406	-0.778375	0.0112152
Tb927.10.5450	>Tb927.10.5450 | organism=Trypanosoma_brucei_TREU927 | product=nucleoplasmin-like protein (NLP) | location=Tb927_10_v5.1:1370851-1373724(+) | length=957 | sequence_SO=chromosome | SO=protein_coding	S268	-0.777342	0.00938347
Tb927.1.990	>Tb927.1.990 | organism=Trypanosoma_brucei_TREU927 | product=hypothetical protein, conserved | location=Tb927_01_v5.1:288582-289706(+) | length=374 | sequence_SO=chromosome | SO=protein_coding	T109	-0.77578	0.0149934
Tb927.11.840.1	>Tb927.11.840.1 | organism=Trypanosoma_brucei_TREU927 | product=unspecified product | location=Tb927_11_v5.1:212576-216517(+) | length=759 | sequence_SO=chromosome | SO=protein_coding;>Tb927.11.840.2 | organism=Trypanosoma_brucei_TREU927 | product=unspecif	S77	-0.768272	0.0272758
Tb927.11.840.1	>Tb927.11.840.1 | organism=Trypanosoma_brucei_TREU927 | product=unspecified product | location=Tb927_11_v5.1:212576-216517(+) | length=759 | sequence_SO=chromosome | SO=protein_coding;>Tb927.11.840.2 | organism=Trypanosoma_brucei_TREU927 | product=unspecif	T78	-0.768272	0.0272758
Tb927.10.11450	>Tb927.10.11450 | organism=Trypanosoma_brucei_TREU927 | product=TFIIF-stimulated CTD phosphatase, putative | location=Tb927_10_v5.1:2794186-2796375(+) | length=729 | sequence_SO=chromosome | SO=protein_coding	T26	-0.762915	0.0227626
Tb927.7.3580	>Tb927.7.3580 | organism=Trypanosoma_brucei_TREU927 | product=protein kinase, putative | location=Tb927_07_v5.1:930342-932132(-) | length=596 | sequence_SO=chromosome | SO=protein_coding	T158	-0.762303	0.0155553
Tb927.9.5620	>Tb927.9.5620 | organism=Trypanosoma_brucei_TREU927 | product=hypothetical protein, conserved | location=Tb927_09_v5.1:965768-969808(+) | length=1346 | sequence_SO=chromosome | SO=protein_coding	S1067	-0.760933	0.0123166
Tb927.8.5710	>Tb927.8.5710 | organism=Trypanosoma_brucei_TREU927 | product=recombination initiation protein NBS1, putative | location=Tb927_08_v5.1:1687940-1691349(+) | length=918 | sequence_SO=chromosome | SO=protein_coding	S533	-0.757139	0.0187915
Tb927.11.1090	>Tb927.11.1090 | organism=Trypanosoma_brucei_TREU927 | product=calpain-like protein, putative,cytoskeleton assocociated protein, putative | location=Tb927_11_v5.1:279190-296707(+) | length=5837 | sequence_SO=chromosome | SO=protein_coding;>Tb927.11.1100 |	S1503	-0.756152	0.0146938
Tb927.5.3240	>Tb927.5.3240 | organism=Trypanosoma_brucei_TREU927 | product=hypothetical protein, conserved | location=Tb927_05_v5.1:1066169-1068562(-) | length=797 | sequence_SO=chromosome | SO=protein_coding	S646	-0.755855	0.0277372
Tb927.9.14330	>Tb927.9.14330 | organism=Trypanosoma_brucei_TREU927 | product=mismatch repair protein PMS1, putative,mismatch repair protein | location=Tb927_09_v5.1:2245644-2248010(-) | length=788 | sequence_SO=chromosome | SO=protein_coding	S441	-0.754335	0.0216812
Tb927.9.4350	>Tb927.9.4350 | organism=Trypanosoma_brucei_TREU927 | product=hypothetical protein, conserved | location=Tb927_09_v5.1:814596-817248(+) | length=881 | sequence_SO=chromosome | SO=protein_coding	S806	-0.752778	0.00724235
Tb927.4.1850	>Tb927.4.1850 | organism=Trypanosoma_brucei_TREU927 | product=hypothetical protein, conserved | location=Tb927_04_v5.1:462661-464397(-) | length=578 | sequence_SO=chromosome | SO=protein_coding	S365	-0.752224	0.0176427
Tb927.6.2250	>Tb927.6.2250 | organism=Trypanosoma_brucei_TREU927 | product=rac serine-threonine kinase, putative,protein kinase, putative | location=Tb927_06_v5.1:709321-710697(+) | length=458 | sequence_SO=chromosome | SO=protein_coding	S144	-0.75128	0.00724235
Tb927.4.4510	>Tb927.4.4510 | organism=Trypanosoma_brucei_TREU927 | product=protein phosphatase 2C, putative | location=Tb927_04_v5.1:1221638-1226266(-) | length=1471 | sequence_SO=chromosome | SO=protein_coding	S447	-0.741434	0.0296559
Tb927.10.170	>Tb927.10.170 | organism=Trypanosoma_brucei_TREU927 | product=pseudouridine synthase, Cbf5p | location=Tb927_10_v5.1:70843-72126(+) | length=427 | sequence_SO=chromosome | SO=protein_coding	S422	-0.740492	0.0392084
Tb927.11.810	>Tb927.11.810 | organism=Trypanosoma_brucei_TREU927 | product=hypothetical protein, conserved | location=Tb927_11_v5.1:205093-207483(+) | length=796 | sequence_SO=chromosome | SO=protein_coding	S85	-0.738281	0.0395126
Tb927.11.9290	>Tb927.11.9290 | organism=Trypanosoma_brucei_TREU927 | product=hypothetical protein, conserved | location=Tb927_11_v5.1:2550418-2552709(+) | length=763 | sequence_SO=chromosome | SO=protein_coding	T339	-0.737953	0.0223426
Tb927.7.3550	>Tb927.7.3550 | organism=Trypanosoma_brucei_TREU927 | product=hypothetical protein, conserved | location=Tb927_07_v5.1:914750-918475(-) | length=1241 | sequence_SO=chromosome | SO=protein_coding	S1235	-0.736909	0.0183968
Tb927.6.640	>Tb927.6.640 | organism=Trypanosoma_brucei_TREU927 | product=kinetoplastid-specific phospho-protein phosphatase, putative | location=Tb927_06_v5.1:265619-267823(-) | length=734 | sequence_SO=chromosome | SO=protein_coding	T549	-0.73047	0.00764849
Tb927.3.3950	>Tb927.3.3950 | organism=Trypanosoma_brucei_TREU927 | product=hypothetical protein, conserved | location=Tb927_03_v5.1:1107571-1109223(+) | length=550 | sequence_SO=chromosome | SO=protein_coding	S161	-0.730255	0.0216745
Tb927.11.1820	>Tb927.11.1820 | organism=Trypanosoma_brucei_TREU927 | product=translation initiation factor eIF2B delta subunit, putative,eIF-2B GDP-GTP exchange factor,guanine nucleotide exchange factor subunit GCD2 | location=Tb927_11_v5.1:540993-542879(-) | length=628	S95	-0.729262	0.0231325
Tb927.1.3910	>Tb927.1.3910 | organism=Trypanosoma_brucei_TREU927 | product=hypothetical protein, conserved | location=Tb927_01_v5.1:833797-836520(+) | length=907 | sequence_SO=chromosome | SO=protein_coding	S784	-0.724736	0.0127573
Tb927.1.4370	>Tb927.1.4370 | organism=Trypanosoma_brucei_TREU927 | product=hypothetical protein, conserved | location=Tb927_01_v5.1:903224-905026(+) | length=600 | sequence_SO=chromosome | SO=protein_coding	S277	-0.724532	0.0127573
Tb927.11.670	>Tb927.11.670 | organism=Trypanosoma_brucei_TREU927 | product=epsinR | location=Tb927_11_v5.1:163804-165321(-) | length=505 | sequence_SO=chromosome | SO=protein_coding;>Tb11.0890 | organism=Trypanosoma_brucei_TREU927 | product=epsin, putative,chrXI additi	S226	-0.724169	0.00894618
Tb927.5.2390	>Tb927.5.2390 | organism=Trypanosoma_brucei_TREU927 | product=hypothetical protein, conserved | location=Tb927_05_v5.1:815287-816315(+) | length=342 | sequence_SO=chromosome | SO=protein_coding	S70	-0.723404	0.043592
Tb927.7.3680	>Tb927.7.3680 | organism=Trypanosoma_brucei_TREU927 | product=ubiquitin/ribosomal protein S27a, putative | location=Tb927_07_v5.1:961080-961541(-) | length=153 | sequence_SO=chromosome | SO=protein_coding;>Tb927.10.5030 | organism=Trypanosoma_brucei_TREU92	S113	-0.720937	0.0228756
Tb927.8.4460	>Tb927.8.4460 | organism=Trypanosoma_brucei_TREU927 | product=hypothetical protein, conserved | location=Tb927_08_v5.1:1320983-1324012(-) | length=1009 | sequence_SO=chromosome | SO=protein_coding	S381	-0.712382	0.0112152
Tb927.10.5950	>Tb927.10.5950 | organism=Trypanosoma_brucei_TREU927 | product=protein kinase, putative | location=Tb927_10_v5.1:1491040-1492524(-) | length=494 | sequence_SO=chromosome | SO=protein_coding;>Tb11.v5.0190 | organism=Trypanosoma_brucei_TREU927 | product=prot	T195	-0.707376	0.0279722
Tb927.8.7950	>Tb927.8.7950 | organism=Trypanosoma_brucei_TREU927 | product=hypothetical protein, conserved | location=Tb927_08_v5.1:2338138-2343381(+) | length=1747 | sequence_SO=chromosome | SO=protein_coding	S427	-0.705668	0.0227852
Tb927.9.1600	>Tb927.9.1600 | organism=Trypanosoma_brucei_TREU927 | product=hypothetical protein, conserved | location=Tb927_09_v5.1:373300-378117(-) | length=1605 | sequence_SO=chromosome | SO=protein_coding	T1326	-0.704446	0.0236951
Tb927.11.11770	>Tb927.11.11770 | organism=Trypanosoma_brucei_TREU927 | product=eukaryotic translation initiation factor 4e, putative | location=Tb927_11_v5.1:3155592-3156920(+) | length=442 | sequence_SO=chromosome | SO=protein_coding	T131	-0.70351	0.0129005
Tb927.3.4960	>Tb927.3.4960 | organism=Trypanosoma_brucei_TREU927 | product=kinesin, putative | location=Tb927_03_v5.1:1389072-1393856(+) | length=1594 | sequence_SO=chromosome | SO=protein_coding	S1003	-0.702818	0.0267168
Tb927.4.4060	>Tb927.4.4060 | organism=Trypanosoma_brucei_TREU927 | product=hypothetical protein, conserved | location=Tb927_04_v5.1:1078402-1081233(-) | length=943 | sequence_SO=chromosome | SO=protein_coding	S49	-0.70233	0.0241425
Tb927.8.1290	>Tb927.8.1290 | organism=Trypanosoma_brucei_TREU927 | product=hypothetical protein, conserved | location=Tb927_08_v5.1:415829-419149(-) | length=1106 | sequence_SO=chromosome | SO=protein_coding	T195	-0.699852	0.025181
Tb927.10.13580	>Tb927.10.13580 | organism=Trypanosoma_brucei_TREU927 | product=transporter, putative,major facilitator superfamily protein (MFS), putative | location=Tb927_10_v5.1:3319739-3320503(-) | length=254 | sequence_SO=chromosome | SO=protein_coding	T470	-0.699705	0.017641
Tb927.8.6630	>Tb927.8.6630 | organism=Trypanosoma_brucei_TREU927 | product=hypothetical protein | location=Tb927_08_v5.1:1913695-1915366(-) | length=184 | sequence_SO=chromosome | SO=protein_coding	S130	-0.695203	0.0359663
Tb927.10.15520	>Tb927.10.15520 | organism=Trypanosoma_brucei_TREU927 | product=signal recognition particle protein, putative | location=Tb927_10_v5.1:3807791-3809821(+) | length=676 | sequence_SO=chromosome | SO=protein_coding;>Tb11.v5.0812 | organism=Trypanosoma_brucei_	S565	-0.692621	0.00938347
Tb927.8.2620	>Tb927.8.2620 | organism=Trypanosoma_brucei_TREU927 | product=hypothetical protein, conserved | location=Tb927_08_v5.1:770953-773457(+) | length=834 | sequence_SO=chromosome | SO=protein_coding	S359	-0.692611	0.0336615
Tb927.1.4310	>Tb927.1.4310 | organism=Trypanosoma_brucei_TREU927 | product=hypothetical protein, conserved | location=Tb927_01_v5.1:890927-895843(+) | length=1638 | sequence_SO=chromosome | SO=protein_coding	S180	-0.691016	0.0449723
Tb927.2.2190	>Tb927.2.2190 | organism=Trypanosoma_brucei_TREU927 | product=histone deacetylase 3 (HDAC3) | location=Tb927_02_v5.1:415146-417461(-) | length=685 | sequence_SO=chromosome | SO=protein_coding	S10	-0.690986	0.00903896
Tb927.9.9690	>Tb927.9.9690 | organism=Trypanosoma_brucei_TREU927 | product=hypothetical protein, conserved | location=Tb927_09_v5.1:1541763-1542548(-) | length=261 | sequence_SO=chromosome | SO=protein_coding	S174	-0.689603	0.0156513
Tb927.11.10520	>Tb927.11.10520 | organism=Trypanosoma_brucei_TREU927 | product=protein kinase, putative,tyrosine kinase, putative | location=Tb927_11_v5.1:2798813-2802595(+) | length=1260 | sequence_SO=chromosome | SO=protein_coding	S1009	-0.688382	0.038764
Tb927.11.12310	>Tb927.11.12310 | organism=Trypanosoma_brucei_TREU927 | product=protein kinase, putative,cdc2-related kinase, putative (CRK12) | location=Tb927_11_v5.1:3289836-3292145(+) | length=769 | sequence_SO=chromosome | SO=protein_coding	S187	-0.687317	0.0147349
Tb927.4.2750	>Tb927.4.2750 | organism=Trypanosoma_brucei_TREU927 | product=hypothetical protein, conserved | location=Tb927_04_v5.1:726421-727320(+) | length=299 | sequence_SO=chromosome | SO=protein_coding	S138	-0.68631	0.012065
Tb927.8.7780	>Tb927.8.7780 | organism=Trypanosoma_brucei_TREU927 | product=hypothetical protein, conserved | location=Tb927_08_v5.1:2261587-2264055(+) | length=822 | sequence_SO=chromosome | SO=protein_coding	S357	-0.685108	0.014511
Tb927.3.3180	>Tb927.3.3180 | organism=Trypanosoma_brucei_TREU927 | product=Nucleoporin (TbNup98) | location=Tb927_03_v5.1:818056-821034(-) | length=992 | sequence_SO=chromosome | SO=protein_coding;>Tb11.v5.0584 | organism=Trypanosoma_brucei_TREU927 | product=hypothetic	S245	-0.68286	0.0268018
Tb927.11.3220	>Tb927.11.3220 | organism=Trypanosoma_brucei_TREU927 | product=metacaspase,cysteine peptidase, Clan CD, family C13 (mca1) | location=Tb927_11_v5.1:915041-916159(-) | length=372 | sequence_SO=chromosome | SO=protein_coding	T367	-0.682351	0.0147349
Tb927.1.4280	>Tb927.1.4280 | organism=Trypanosoma_brucei_TREU927 | product=hypothetical protein, conserved | location=Tb927_01_v5.1:881086-883182(+) | length=698 | sequence_SO=chromosome | SO=protein_coding	T558	-0.681858	0.0141521
Tb927.10.14470	>Tb927.10.14470 | organism=Trypanosoma_brucei_TREU927 | product=intraflagellar transport protein IFT140, putative (IFT140) | location=Tb927_10_v5.1:3531079-3536169(-) | length=1696 | sequence_SO=chromosome | SO=protein_coding	S1081	-0.681797	0.00840596
Tb927.10.800	>Tb927.10.800 | organism=Trypanosoma_brucei_TREU927 | product=hypothetical protein, conserved | location=Tb927_10_v5.1:206189-207409(+) | length=406 | sequence_SO=chromosome | SO=protein_coding	T239	-0.681087	0.0149934
Tb927.10.800	>Tb927.10.800 | organism=Trypanosoma_brucei_TREU927 | product=hypothetical protein, conserved | location=Tb927_10_v5.1:206189-207409(+) | length=406 | sequence_SO=chromosome | SO=protein_coding	T240	-0.681087	0.0149934
Tb927.11.12640	>Tb927.11.12640 | organism=Trypanosoma_brucei_TREU927 | product=hypothetical protein, conserved | location=Tb927_11_v5.1:3386421-3389345(+) | length=974 | sequence_SO=chromosome | SO=protein_coding	S651	-0.680222	0.0325845
Tb927.10.8560	>Tb927.10.8560 | organism=Trypanosoma_brucei_TREU927 | product=small GTPase, putative (RAB23) | location=Tb927_10_v5.1:2120113-2120793(+) | length=226 | sequence_SO=chromosome | SO=protein_coding	S195	-0.677096	0.0327409
Tb927.11.4220	>Tb927.11.4220 | organism=Trypanosoma_brucei_TREU927 | product=palmitoyl acyltransferase 6, putative | location=Tb927_11_v5.1:1235360-1236709(-) | length=449 | sequence_SO=chromosome | SO=protein_coding	S192	-0.677017	0.0395126
Tb927.5.2730	>Tb927.5.2730 | organism=Trypanosoma_brucei_TREU927 | product=hypothetical protein, conserved | location=Tb927_05_v5.1:920921-921724(+) | length=267 | sequence_SO=chromosome | SO=protein_coding	S236	-0.67469	0.026902
Tb927.9.6450	>Tb927.9.6450 | organism=Trypanosoma_brucei_TREU927 | product=hypothetical protein, conserved | location=Tb927_09_v5.1:1059300-1060661(+) | length=453 | sequence_SO=chromosome | SO=protein_coding	T175	-0.674195	0.0217329
Tb927.11.10650	>Tb927.11.10650 | organism=Trypanosoma_brucei_TREU927 | product=beta-adaptin 3, putative,adaptin complex 3 subunit, putative | location=Tb927_11_v5.1:2836054-2838810(+) | length=918 | sequence_SO=chromosome | SO=protein_coding	S897	-0.671666	0.00903896
Tb927.5.570	>Tb927.5.570 | organism=Trypanosoma_brucei_TREU927 | product=hypothetical protein, conserved | location=Tb927_05_v5.1:232810-239193(-) | length=2127 | sequence_SO=chromosome | SO=protein_coding	S1771	-0.671067	0.028323
Tb927.5.3240	>Tb927.5.3240 | organism=Trypanosoma_brucei_TREU927 | product=hypothetical protein, conserved | location=Tb927_05_v5.1:1066169-1068562(-) | length=797 | sequence_SO=chromosome | SO=protein_coding	S444	-0.668503	0.0135856
Tb927.5.1690	>Tb927.5.1690 | organism=Trypanosoma_brucei_TREU927 | product=hypothetical protein, conserved | location=Tb927_05_v5.1:592160-593548(+) | length=462 | sequence_SO=chromosome | SO=protein_coding;>Tb11.v5.0740 | organism=Trypanosoma_brucei_TREU927 | product=	S151	-0.666082	0.0137898
Tb927.5.570	>Tb927.5.570 | organism=Trypanosoma_brucei_TREU927 | product=hypothetical protein, conserved | location=Tb927_05_v5.1:232810-239193(-) | length=2127 | sequence_SO=chromosome | SO=protein_coding	T1772	-0.663493	0.0241166
Tb927.11.3490	>Tb927.11.3490 | organism=Trypanosoma_brucei_TREU927 | product=hypothetical protein, conserved | location=Tb927_11_v5.1:1032022-1034418(+) | length=798 | sequence_SO=chromosome | SO=protein_coding	S379	-0.662578	0.0135344
Tb927.1.1370	>Tb927.1.1370 | organism=Trypanosoma_brucei_TREU927 | product=rRNA biogenesis protein, putative | location=Tb927_01_v5.1:350095-352134(+) | length=679 | sequence_SO=chromosome | SO=protein_coding;>Tb11.v5.0391 | organism=Trypanosoma_brucei_TREU927 | produc	S663	-0.661743	0.0137898
Tb927.8.2450	>Tb927.8.2450 | organism=Trypanosoma_brucei_TREU927 | product=hypothetical protein, conserved | location=Tb927_08_v5.1:733252-734184(+) | length=310 | sequence_SO=chromosome | SO=protein_coding	T236	-0.659215	0.0152874
Tb927.10.1170	>Tb927.10.1170 | organism=Trypanosoma_brucei_TREU927 | product=intraflagellar transport protein IFT172, putative (IFT172) | location=Tb927_10_v5.1:311528-316771(-) | length=1747 | sequence_SO=chromosome | SO=protein_coding;>Tb11.0560 | organism=Trypanosoma	S1040	-0.657886	0.0158205
Tb927.8.3410	>Tb927.8.3410 | organism=Trypanosoma_brucei_TREU927 | product=hypothetical protein, conserved | location=Tb927_08_v5.1:1016368-1020924(+) | length=1518 | sequence_SO=chromosome | SO=protein_coding	T702	-0.657225	0.0312124
Tb927.3.1140	>Tb927.3.1140 | organism=Trypanosoma_brucei_TREU927 | product=hypothetical protein, conserved | location=Tb927_03_v5.1:278267-279439(+) | length=390 | sequence_SO=chromosome | SO=protein_coding	S389	-0.653056	0.0318748
Tb927.4.4280	>Tb927.4.4280 | organism=Trypanosoma_brucei_TREU927 | product=hypothetical protein, conserved | location=Tb927_04_v5.1:1133662-1134654(-) | length=330 | sequence_SO=chromosome | SO=protein_coding;>Tb927.4.4260 | organism=Trypanosoma_brucei_TREU927 | produc	S272	-0.652685	0.0159725
Tb927.9.8060	>Tb927.9.8060 | organism=Trypanosoma_brucei_TREU927 | product=hypothetical protein, conserved | location=Tb927_09_v5.1:1333595-1335325(-) | length=576 | sequence_SO=chromosome | SO=protein_coding	S257	-0.651884	0.0172745
Tb927.1.1530	>Tb927.1.1530 | organism=Trypanosoma_brucei_TREU927 | product=protein kinase, putative | location=Tb927_01_v5.1:385710-390938(+) | length=1742 | sequence_SO=chromosome | SO=protein_coding	S337	-0.649458	0.0127573
Tb927.10.11780	>Tb927.10.11780 | organism=Trypanosoma_brucei_TREU927 | product=hypothetical protein, conserved | location=Tb927_10_v5.1:2878763-2882254(+) | length=1163 | sequence_SO=chromosome | SO=protein_coding	S254	-0.648821	0.0256147
Tb927.10.11780	>Tb927.10.11780 | organism=Trypanosoma_brucei_TREU927 | product=hypothetical protein, conserved | location=Tb927_10_v5.1:2878763-2882254(+) | length=1163 | sequence_SO=chromosome | SO=protein_coding	T253	-0.648821	0.0256147
Tb927.6.4710	>Tb927.6.4710 | organism=Trypanosoma_brucei_TREU927 | product=calmodulin, putative | location=Tb927_06_v5.1:1310631-1312652(+) | length=673 | sequence_SO=chromosome | SO=protein_coding	S273	-0.64625	0.043592
Tb927.4.760	>Tb927.4.760 | organism=Trypanosoma_brucei_TREU927 | product=gamma-adaptin 1, putative,AP-1 adapter complex gamma subunit, putative | location=Tb927_04_v5.1:208118-210523(-) | length=801 | sequence_SO=chromosome | SO=protein_coding	S642	-0.644076	0.0355023
Tb927.4.310	>Tb927.4.310 | organism=Trypanosoma_brucei_TREU927 | product=hypothetical protein, conserved | location=Tb927_04_v5.1:80881-100722(-) | length=6613 | sequence_SO=chromosome | SO=protein_coding	S1531	-0.64308	0.0268086
Tb927.3.3230	>Tb927.3.3230 | organism=Trypanosoma_brucei_TREU927 | product=hypothetical protein, conserved | location=Tb927_03_v5.1:833281-835110(-) | length=609 | sequence_SO=chromosome | SO=protein_coding	S16	-0.642553	0.00938347
Tb927.1.4280	>Tb927.1.4280 | organism=Trypanosoma_brucei_TREU927 | product=hypothetical protein, conserved | location=Tb927_01_v5.1:881086-883182(+) | length=698 | sequence_SO=chromosome | SO=protein_coding	S402	-0.642173	0.0362206
Tb927.9.10230	>Tb927.9.10230 | organism=Trypanosoma_brucei_TREU927 | product=hypothetical protein, conserved | location=Tb927_09_v5.1:1608745-1609251(-) | length=168 | sequence_SO=chromosome | SO=protein_coding	T96	-0.640117	0.0352617
Tb927.2.6050	>Tb927.2.6050 | organism=Trypanosoma_brucei_TREU927 | product=beta prime COP protein | location=Tb927_02_v5.1:1092946-1095501(+) | length=851 | sequence_SO=chromosome | SO=protein_coding	T827	-0.63871	0.0234835
Tb927.4.4430	>Tb927.4.4430 | organism=Trypanosoma_brucei_TREU927 | product=adenylyl cyclase (GRESAG 4.4) | location=Tb927_04_v5.1:1177303-1181060(-) | length=1243 | sequence_SO=chromosome | SO=protein_coding;>Tb927.4.4450 | organism=Trypanosoma_brucei_TREU927 | product	S1194	-0.638282	0.0147349
Tb927.7.5610	>Tb927.7.5610 | organism=Trypanosoma_brucei_TREU927 | product=hypothetical protein, conserved | location=Tb927_07_v5.1:1516847-1520119(+) | length=1090 | sequence_SO=chromosome | SO=protein_coding	T74	-0.637489	0.017641
Tb927.11.3220	>Tb927.11.3220 | organism=Trypanosoma_brucei_TREU927 | product=metacaspase,cysteine peptidase, Clan CD, family C13 (mca1) | location=Tb927_11_v5.1:915041-916159(-) | length=372 | sequence_SO=chromosome | SO=protein_coding	T366	-0.636329	0.0268086
Tb927.7.2650	>Tb927.7.2650 | organism=Trypanosoma_brucei_TREU927 | product=hypothetical protein, conserved | location=Tb927_07_v5.1:678884-680497(-) | length=537 | sequence_SO=chromosome | SO=protein_coding	S135	-0.636059	0.0312124
Tb927.1.4280	>Tb927.1.4280 | organism=Trypanosoma_brucei_TREU927 | product=hypothetical protein, conserved | location=Tb927_01_v5.1:881086-883182(+) | length=698 | sequence_SO=chromosome | SO=protein_coding	S143	-0.635678	0.0327393
Tb927.7.1580	>Tb927.7.1580 | organism=Trypanosoma_brucei_TREU927 | product=hypothetical protein, conserved | location=Tb927_07_v5.1:395945-398620(+) | length=891 | sequence_SO=chromosome | SO=protein_coding	S884	-0.635074	0.0314504
Tb927.11.11770	>Tb927.11.11770 | organism=Trypanosoma_brucei_TREU927 | product=eukaryotic translation initiation factor 4e, putative | location=Tb927_11_v5.1:3155592-3156920(+) | length=442 | sequence_SO=chromosome | SO=protein_coding	T133	-0.632534	0.0390565
Tb927.5.2680	>Tb927.5.2680 | organism=Trypanosoma_brucei_TREU927 | product=hypothetical protein, conserved | location=Tb927_05_v5.1:909611-911866(+) | length=751 | sequence_SO=chromosome | SO=protein_coding	T148	-0.631009	0.0216812
Tb927.1.3940	>Tb927.1.3940 | organism=Trypanosoma_brucei_TREU927 | product=hypothetical protein, conserved | location=Tb927_01_v5.1:837683-840421(+) | length=912 | sequence_SO=chromosome | SO=protein_coding	S853	-0.629225	0.0235083
Tb927.1.3070	>Tb927.1.3070 | organism=Trypanosoma_brucei_TREU927 | product=hypothetical protein, conserved | location=Tb927_01_v5.1:675213-676454(+) | length=413 | sequence_SO=chromosome | SO=protein_coding	S36	-0.627659	0.00915784
Tb927.11.1660	>Tb927.11.1660 | organism=Trypanosoma_brucei_TREU927 | product=vesicular transport protein (CDC48 homologue), putative | location=Tb927_11_v5.1:509071-511059(-) | length=662 | sequence_SO=chromosome | SO=protein_coding	T76	-0.626959	0.0327409
Tb927.7.4490	>Tb927.7.4490 | organism=Trypanosoma_brucei_TREU927 | product=hypothetical protein, conserved | location=Tb927_07_v5.1:1192674-1198526(-) | length=1643 | sequence_SO=chromosome | SO=protein_coding;>Tb11.v5.0262 | organism=Trypanosoma_brucei_TREU927 | produ	S1508	-0.624527	0.0240385
Tb927.11.15010	>Tb927.11.15010 | organism=Trypanosoma_brucei_TREU927 | product=serine/threonine-protein kinase, putative | location=Tb927_11_v5.1:3992052-3993773(-) | length=573 | sequence_SO=chromosome | SO=protein_coding	S42	-0.623784	0.0219672
Tb927.11.1360	>Tb927.11.1360 | organism=Trypanosoma_brucei_TREU927 | product=hypothetical protein, conserved | location=Tb927_11_v5.1:394933-396639(+) | length=568 | sequence_SO=chromosome | SO=protein_coding	S194	-0.620683	0.0344322
Tb927.11.1360	>Tb927.11.1360 | organism=Trypanosoma_brucei_TREU927 | product=hypothetical protein, conserved | location=Tb927_11_v5.1:394933-396639(+) | length=568 | sequence_SO=chromosome | SO=protein_coding	S203	-0.620683	0.0344322
Tb927.9.9450	>Tb927.9.9450 | organism=Trypanosoma_brucei_TREU927 | product=zinc finger protein family member, putative (ZC3H28) | location=Tb927_09_v5.1:1510030-1513122(-) | length=1030 | sequence_SO=chromosome | SO=protein_coding	Y937	-0.620116	0.0350798
Tb927.7.4500	>Tb927.7.4500 | organism=Trypanosoma_brucei_TREU927 | product=hypothetical protein, conserved | location=Tb927_07_v5.1:1198019-1199605(-) | length=528 | sequence_SO=chromosome | SO=protein_coding;>Tb11.v5.0263 | organism=Trypanosoma_brucei_TREU927 | produc	T260	-0.618672	0.0150056
Tb927.4.4710	>Tb927.4.4710 | organism=Trypanosoma_brucei_TREU927 | product=hypothetical protein, conserved | location=Tb927_04_v5.1:1295007-1298096(-) | length=1029 | sequence_SO=chromosome | SO=protein_coding	S413	-0.618587	0.0124952
Tb927.3.4840	>Tb927.3.4840 | organism=Trypanosoma_brucei_TREU927 | product=ubiquitin hydrolase, putative,cysteine peptidase, Clan CA, family C19, putative | location=Tb927_03_v5.1:1363025-1365220(-) | length=731 | sequence_SO=chromosome | SO=protein_coding	S649	-0.618404	0.0155553
Tb927.11.670	>Tb927.11.670 | organism=Trypanosoma_brucei_TREU927 | product=epsinR | location=Tb927_11_v5.1:163804-165321(-) | length=505 | sequence_SO=chromosome | SO=protein_coding	T5	-0.615997	0.0229023
Tb927.10.13840	>Tb927.10.13840 | organism=Trypanosoma_brucei_TREU927 | product=hypothetical protein, conserved | location=Tb927_10_v5.1:3378431-3379459(-) | length=342 | sequence_SO=chromosome | SO=protein_coding	T28	-0.615446	0.0127573
Tb927.11.11770	>Tb927.11.11770 | organism=Trypanosoma_brucei_TREU927 | product=eukaryotic translation initiation factor 4e, putative | location=Tb927_11_v5.1:3155592-3156920(+) | length=442 | sequence_SO=chromosome | SO=protein_coding	S65	-0.615262	0.0194756
Tb927.9.15290	>Tb927.9.15290 | organism=Trypanosoma_brucei_TREU927 | product=hypothetical protein, conserved | location=Tb927_09_v5.1:2370992-2375128(+) | length=1378 | sequence_SO=chromosome | SO=protein_coding	T280	-0.614911	0.0158179
Tb927.11.9400	>Tb927.11.9400 | organism=Trypanosoma_brucei_TREU927 | product=hypothetical protein, conserved | location=Tb927_11_v5.1:2577671-2580334(-) | length=887 | sequence_SO=chromosome | SO=protein_coding	S615	-0.614172	0.0224484
Tb927.1.3270	>Tb927.1.3270 | organism=Trypanosoma_brucei_TREU927 | product=hypothetical protein, conserved | location=Tb927_01_v5.1:709573-712308(+) | length=911 | sequence_SO=chromosome | SO=protein_coding	S420	-0.61374	0.0202299
Tb927.2.4550	>Tb927.2.4550 | organism=Trypanosoma_brucei_TREU927 | product=FtsJ cell division protein, putative | location=Tb927_02_v5.1:808085-810802(-) | length=905 | sequence_SO=chromosome | SO=protein_coding	S509	-0.613597	0.0441178
Tb927.11.12480	>Tb927.11.12480 | organism=Trypanosoma_brucei_TREU927 | product=kinetoplastid-specific phospho-protein phosphatase, putative | location=Tb927_11_v5.1:3346414-3348327(+) | length=637 | sequence_SO=chromosome | SO=protein_coding	S248	-0.613267	0.0268221
Tb927.10.8820	>Tb927.10.8820 | organism=Trypanosoma_brucei_TREU927 | product=hypothetical protein, conserved | location=Tb927_10_v5.1:2179895-2182195(+) | length=766 | sequence_SO=chromosome | SO=protein_coding	S653	-0.612749	0.0155553
Tb927.10.5620	>Tb927.10.5620 | organism=Trypanosoma_brucei_TREU927 | product=fructose-bisphosphate aldolase, glycosomal (ALD) | location=Tb927_10_v5.1:1404259-1405377(+) | length=372 | sequence_SO=chromosome | SO=protein_coding;>Tb11.v5.0531 | organism=Trypanosoma_bruce	S329	-0.60976	0.0403862
Tb927.11.1090	>Tb927.11.1090 | organism=Trypanosoma_brucei_TREU927 | product=calpain-like protein, putative,cytoskeleton assocociated protein, putative | location=Tb927_11_v5.1:279190-296707(+) | length=5837 | sequence_SO=chromosome | SO=protein_coding	S1432	-0.60876	0.0169578
Tb927.5.2330	>Tb927.5.2330 | organism=Trypanosoma_brucei_TREU927 | product=hypothetical protein, conserved | location=Tb927_05_v5.1:786941-800194(+) | length=4417 | sequence_SO=chromosome | SO=protein_coding	S2242	-0.606767	0.0336615
Tb927.10.3000	>Tb927.10.3000 | organism=Trypanosoma_brucei_TREU927 | product=hypothetical protein, conserved | location=Tb927_10_v5.1:783016-785373(+) | length=785 | sequence_SO=chromosome | SO=protein_coding;>Tb11.v5.0467 | organism=Trypanosoma_brucei_TREU927 | product	S544	-0.605117	0.0132161
Tb927.1.3070	>Tb927.1.3070 | organism=Trypanosoma_brucei_TREU927 | product=hypothetical protein, conserved | location=Tb927_01_v5.1:675213-676454(+) | length=413 | sequence_SO=chromosome | SO=protein_coding	S39	-0.603625	0.00982074
Tb927.9.6920	>Tb927.9.6920 | organism=Trypanosoma_brucei_TREU927 | product=hypothetical protein, conserved | location=Tb927_09_v5.1:1130911-1131999(+) | length=362 | sequence_SO=chromosome | SO=protein_coding	S182	-0.603069	0.0329554
Tb927.9.6920	>Tb927.9.6920 | organism=Trypanosoma_brucei_TREU927 | product=hypothetical protein, conserved | location=Tb927_09_v5.1:1130911-1131999(+) | length=362 | sequence_SO=chromosome | SO=protein_coding	T180	-0.603069	0.0329554
Tb927.10.7770	>Tb927.10.7770 | organism=Trypanosoma_brucei_TREU927 | product=hypothetical protein | location=Tb927_10_v5.1:1950333-1951025(-) | length=230 | sequence_SO=chromosome | SO=protein_coding	T143	-0.60269	0.0268086
Tb927.3.4720	>Tb927.3.4720 | organism=Trypanosoma_brucei_TREU927 | product=dynamin, putative,vacuolar sortin protein 1, putative | location=Tb927_03_v5.1:1333544-1335526(-) | length=660 | sequence_SO=chromosome | SO=protein_coding	S540	-0.602021	0.0326186
Tb927.6.3710	>Tb927.6.3710 | organism=Trypanosoma_brucei_TREU927 | product=hypothetical protein, conserved | location=Tb927_06_v5.1:1105138-1107294(-) | length=718 | sequence_SO=chromosome | SO=protein_coding	S466	-0.600666	0.029811
Tb927.7.4900	>Tb927.7.4900 | organism=Trypanosoma_brucei_TREU927 | product=5-3 exonuclease XRNA, putative,exoribonuclease 1, putative (XRNA) | location=Tb927_07_v5.1:1287020-1291276(-) | length=1418 | sequence_SO=chromosome | SO=protein_coding;>Tb11.v5.0171 | organis	T1256	-0.598727	0.0224484
Tb927.9.10920	>Tb927.9.10920 | organism=Trypanosoma_brucei_TREU927 | product=protein kinase, putative | location=Tb927_09_v5.1:1718064-1721240(-) | length=1058 | sequence_SO=chromosome | SO=protein_coding	S749	-0.596253	0.0312124
Tb927.1.990	>Tb927.1.990 | organism=Trypanosoma_brucei_TREU927 | product=hypothetical protein, conserved | location=Tb927_01_v5.1:288582-289706(+) | length=374 | sequence_SO=chromosome | SO=protein_coding	S152	-0.594834	0.032497
Tb927.9.7520	>Tb927.9.7520 | organism=Trypanosoma_brucei_TREU927 | product=hypothetical protein, conserved | location=Tb927_09_v5.1:1235234-1236274(-) | length=346 | sequence_SO=chromosome | SO=protein_coding	S10	-0.594753	0.0327409
Tb927.10.2950	>Tb927.10.2950 | organism=Trypanosoma_brucei_TREU927 | product=hypothetical protein, conserved | location=Tb927_10_v5.1:766784-772387(+) | length=1867 | sequence_SO=chromosome | SO=protein_coding	S1173	-0.594544	0.0182294
Tb927.10.3920	>Tb927.10.3920 | organism=Trypanosoma_brucei_TREU927 | product=hypothetical protein, conserved | location=Tb927_10_v5.1:1040528-1041994(-) | length=488 | sequence_SO=chromosome | SO=protein_coding;>Tb11.v5.0502 | organism=Trypanosoma_brucei_TREU927 | produ	S99	-0.592293	0.0152874
Tb927.3.1920	>Tb927.3.1920 | organism=Trypanosoma_brucei_TREU927 | product=NOT5 protein (NOT5) | location=Tb927_03_v5.1:505299-507113(-) | length=604 | sequence_SO=chromosome | SO=protein_coding	S395	-0.591052	0.0137898
Tb927.11.16470	>Tb927.11.16470 | organism=Trypanosoma_brucei_TREU927 | product=hypothetical protein, conserved | location=Tb927_11_v5.1:4365215-4367566(-) | length=783 | sequence_SO=chromosome | SO=protein_coding	S64	-0.590384	0.0311464
Tb927.2.2580	>Tb927.2.2580 | organism=Trypanosoma_brucei_TREU927 | product=hypothetical protein, conserved | location=Tb927_02_v5.1:506430-509603(-) | length=1057 | sequence_SO=chromosome | SO=protein_coding	S739	-0.590374	0.0267168
Tb927.3.3130	>Tb927.3.3130 | organism=Trypanosoma_brucei_TREU927 | product=hypothetical protein, conserved | location=Tb927_03_v5.1:802511-807439(-) | length=1642 | sequence_SO=chromosome | SO=protein_coding	S1152	-0.589676	0.017641
Tb927.10.570	>Tb927.10.570 | organism=Trypanosoma_brucei_TREU927 | product=hypothetical protein, conserved | location=Tb927_10_v5.1:148241-153298(+) | length=1685 | sequence_SO=chromosome | SO=protein_coding	S171	-0.589022	0.0155553
Tb927.7.3550	>Tb927.7.3550 | organism=Trypanosoma_brucei_TREU927 | product=hypothetical protein, conserved | location=Tb927_07_v5.1:914750-918475(-) | length=1241 | sequence_SO=chromosome | SO=protein_coding	S439	-0.589014	0.0344322
Tb927.10.2270	>Tb927.10.2270 | organism=Trypanosoma_brucei_TREU927 | product=vacuolar protein sorting-associated protein 35, putative | location=Tb927_10_v5.1:587863-590664(+) | length=933 | sequence_SO=chromosome | SO=protein_coding	S659	-0.587665	0.0182294
Tb927.1.4310	>Tb927.1.4310 | organism=Trypanosoma_brucei_TREU927 | product=hypothetical protein, conserved | location=Tb927_01_v5.1:890927-895843(+) | length=1638 | sequence_SO=chromosome | SO=protein_coding	T272	-0.58571	0.0280739
Tb927.5.630	>Tb927.5.630 | organism=Trypanosoma_brucei_TREU927 | product=acidic phosphatase, putative | location=Tb927_05_v5.1:265245-268369(-) | length=401 | sequence_SO=chromosome | SO=protein_coding;>Tb11.v5.0851 | organism=Trypanosoma_brucei_TREU927 | product=hypo	S386	-0.585614	0.0146938
Tb927.5.1600	>Tb927.5.1600 | organism=Trypanosoma_brucei_TREU927 | product=hypothetical protein, conserved | location=Tb927_05_v5.1:565001-566857(+) | length=618 | sequence_SO=chromosome | SO=protein_coding	S461	0.58503	0.0238748
Tb927.2.5150	>Tb927.2.5150 | organism=Trypanosoma_brucei_TREU927 | product=TPR-repeat protein, putative | location=Tb927_02_v5.1:908758-910654(+) | length=489 | sequence_SO=chromosome | SO=protein_coding	S289	0.585768	0.0475812
Tb927.6.1940	>Tb927.6.1940 | organism=Trypanosoma_brucei_TREU927 | product=leucine-rich repeat protein (LRRP), putative | location=Tb927_06_v5.1:638825-640837(-) | length=670 | sequence_SO=chromosome | SO=protein_coding	S376	0.58634	0.0271185
Tb927.11.10090	>Tb927.11.10090 | organism=Trypanosoma_brucei_TREU927 | product=hypothetical protein, conserved | location=Tb927_11_v5.1:2705556-2706803(+) | length=415 | sequence_SO=chromosome | SO=protein_coding	S294	0.58668	0.0127573
Tb927.3.5250	>Tb927.3.5250 | organism=Trypanosoma_brucei_TREU927 | product=ZFP family member, putative (ZC3H8) | location=Tb927_03_v5.1:1473439-1475178(+) | length=579 | sequence_SO=chromosome | SO=protein_coding	S308	0.587574	0.0256147
Tb927.7.3550	>Tb927.7.3550 | organism=Trypanosoma_brucei_TREU927 | product=hypothetical protein, conserved | location=Tb927_07_v5.1:914750-918475(-) | length=1241 | sequence_SO=chromosome | SO=protein_coding	S1048	0.587894	0.0127573
Tb927.5.2820	>Tb927.5.2820 | organism=Trypanosoma_brucei_TREU927 | product=protein kinase, putative | location=Tb927_05_v5.1:947334-950426(-) | length=1030 | sequence_SO=chromosome | SO=protein_coding	S814	0.587959	0.0355023
Tb927.11.5640	>Tb927.11.5640 | organism=Trypanosoma_brucei_TREU927 | product=hypothetical protein, conserved | location=Tb927_11_v5.1:1593319-1596093(+) | length=924 | sequence_SO=chromosome | SO=protein_coding	S710	0.588465	0.0311464
Tb927.5.2820	>Tb927.5.2820 | organism=Trypanosoma_brucei_TREU927 | product=protein kinase, putative | location=Tb927_05_v5.1:947334-950426(-) | length=1030 | sequence_SO=chromosome | SO=protein_coding	S808	0.590022	0.0325845
Tb927.8.5450	>Tb927.8.5450 | organism=Trypanosoma_brucei_TREU927 | product=amino acid permease, putative (AAT6) | location=Tb927_08_v5.1:1614773-1616239(+) | length=488 | sequence_SO=chromosome | SO=protein_coding	S71	0.590213	0.021544
Tb927.4.2920	>Tb927.4.2920 | organism=Trypanosoma_brucei_TREU927 | product=hypothetical protein, conserved | location=Tb927_04_v5.1:774789-777689(+) | length=966 | sequence_SO=chromosome | SO=protein_coding	S236	0.590752	0.0479248
Tb927.11.16210	>Tb927.11.16210 | organism=Trypanosoma_brucei_TREU927 | product=cyclic nucleotide-binding protein, putative | location=Tb927_11_v5.1:4290249-4292366(-) | length=705 | sequence_SO=chromosome | SO=protein_coding	S596	0.590787	0.0327409
Tb927.4.4580	>Tb927.4.4580 | organism=Trypanosoma_brucei_TREU927 | product=hypothetical protein, conserved | location=Tb927_04_v5.1:1263238-1266489(-) | length=1083 | sequence_SO=chromosome | SO=protein_coding	S1050	0.591204	0.0395126
Tb927.6.3330	>Tb927.6.3330 | organism=Trypanosoma_brucei_TREU927 | product=hypothetical protein, conserved | location=Tb927_06_v5.1:980257-981150(+) | length=297 | sequence_SO=chromosome | SO=protein_coding	S83	0.591393	0.0253024
Tb927.11.9620.1	>Tb927.11.9620.1 | organism=Trypanosoma_brucei_TREU927 | product=unspecified product | location=Tb927_11_v5.1:2615310-2618187(-) | length=750 | sequence_SO=chromosome | SO=protein_coding;>Tb927.11.9620.2 | organism=Trypanosoma_brucei_TREU927 | product=unsp	S368	0.591921	0.0256147
Tb927.1.2100	>Tb927.1.2100 | organism=Trypanosoma_brucei_TREU927 | product=calpain-like cysteine peptidase, putative,cysteine peptidase, Clan CA, family C2, putative | location=Tb927_01_v5.1:531578-535023(+) | length=1146 | sequence_SO=chromosome | SO=protein_coding	S291	0.592674	0.0383641
Tb927.6.2210	>Tb927.6.2210 | organism=Trypanosoma_brucei_TREU927 | product=hypothetical protein, conserved | location=Tb927_06_v5.1:699807-703193(+) | length=1128 | sequence_SO=chromosome | SO=protein_coding	S898	0.593573	0.0194756
Tb927.11.10200	>Tb927.11.10200 | organism=Trypanosoma_brucei_TREU927 | product=hypothetical protein, conserved | location=Tb927_11_v5.1:2728749-2730221(+) | length=490 | sequence_SO=chromosome | SO=protein_coding	S118	0.594746	0.0170003
Tb927.10.6580	>Tb927.10.6580 | organism=Trypanosoma_brucei_TREU927 | product=hypothetical protein | location=Tb927_10_v5.1:1665051-1666700(+) | length=549 | sequence_SO=chromosome | SO=protein_coding	S149	0.595592	0.0226186
Tb927.11.3390	>Tb927.11.3390 | organism=Trypanosoma_brucei_TREU927 | product=hypothetical protein, conserved | location=Tb927_11_v5.1:993342-1006724(+) | length=4460 | sequence_SO=chromosome | SO=protein_coding	T2842	0.597127	0.0350798
Tb927.1.750	>Tb927.1.750 | organism=Trypanosoma_brucei_TREU927 | product=hypothetical protein, conserved | location=Tb927_01_v5.1:241993-245640(-) | length=1215 | sequence_SO=chromosome | SO=protein_coding	S588	0.597227	0.0147349
Tb927.7.5340	>Tb927.7.5340 | organism=Trypanosoma_brucei_TREU927 | product=hypothetical protein, conserved | location=Tb927_07_v5.1:1419326-1420822(+) | length=498 | sequence_SO=chromosome | SO=protein_coding	S175	0.598012	0.0440842
Tb927.10.8820	>Tb927.10.8820 | organism=Trypanosoma_brucei_TREU927 | product=hypothetical protein, conserved | location=Tb927_10_v5.1:2179895-2182195(+) | length=766 | sequence_SO=chromosome | SO=protein_coding	S645	0.599001	0.0220289
Tb927.1.4310	>Tb927.1.4310 | organism=Trypanosoma_brucei_TREU927 | product=hypothetical protein, conserved | location=Tb927_01_v5.1:890927-895843(+) | length=1638 | sequence_SO=chromosome | SO=protein_coding	T516	0.599218	0.0316863
Tb927.10.3010	>Tb927.10.3010 | organism=Trypanosoma_brucei_TREU927 | product=hypothetical protein, conserved | location=Tb927_10_v5.1:786335-790006(+) | length=1223 | sequence_SO=chromosome | SO=protein_coding	S134	0.600747	0.0244934
Tb927.4.1680	>Tb927.4.1680 | organism=Trypanosoma_brucei_TREU927 | product=ZFP family member, putative (ZC3H10) | location=Tb927_04_v5.1:429057-430466(-) | length=469 | sequence_SO=chromosome | SO=protein_coding	T136	0.603395	0.0365736
Tb927.11.13000	>Tb927.11.13000 | organism=Trypanosoma_brucei_TREU927 | product=phospholipid-transporting ATPase, putative | location=Tb927_11_v5.1:3478575-3483284(-) | length=1569 | sequence_SO=chromosome | SO=protein_coding	S794	0.605999	0.0194756
Tb927.10.15700	>Tb927.10.15700 | organism=Trypanosoma_brucei_TREU927 | product=hypothetical protein, conserved | location=Tb927_10_v5.1:3854999-3865357(+) | length=3452 | sequence_SO=chromosome | SO=protein_coding	S114	0.606257	0.015505
Tb927.5.570	>Tb927.5.570 | organism=Trypanosoma_brucei_TREU927 | product=hypothetical protein, conserved | location=Tb927_05_v5.1:232810-239193(-) | length=2127 | sequence_SO=chromosome | SO=protein_coding	S1616	0.615868	0.0129005
Tb927.6.3670	>Tb927.6.3670 | organism=Trypanosoma_brucei_TREU927 | product=paraflagellar rod component, putative (PFC8) | location=Tb927_06_v5.1:1090477-1100145(-) | length=3222 | sequence_SO=chromosome | SO=protein_coding	S2188	0.616962	0.0170484
Tb927.3.1990	>Tb927.3.1990 | organism=Trypanosoma_brucei_TREU927 | product=hypothetical protein, conserved | location=Tb927_03_v5.1:518838-520283(-) | length=481 | sequence_SO=chromosome | SO=protein_coding	T18	0.617326	0.0109759
Tb927.7.3550	>Tb927.7.3550 | organism=Trypanosoma_brucei_TREU927 | product=hypothetical protein, conserved | location=Tb927_07_v5.1:914750-918475(-) | length=1241 | sequence_SO=chromosome | SO=protein_coding	T1046	0.617926	0.0129005
Tb927.4.2640	>Tb927.4.2640 | organism=Trypanosoma_brucei_TREU927 | product=hypothetical protein, conserved | location=Tb927_04_v5.1:697918-701742(+) | length=1274 | sequence_SO=chromosome | SO=protein_coding	S312	0.618339	0.0268086
Tb927.6.2000	>Tb927.6.2000 | organism=Trypanosoma_brucei_TREU927 | product=spliceosome-associated protein, putative | location=Tb927_06_v5.1:651269-652702(-) | length=477 | sequence_SO=chromosome | SO=protein_coding	S50	0.618376	0.0221274
Tb927.11.9470	>Tb927.11.9470 | organism=Trypanosoma_brucei_TREU927 | product=ADP-ribosylation factor GTPase activating protein, putative | location=Tb927_11_v5.1:2589022-2590083(-) | length=353 | sequence_SO=chromosome | SO=protein_coding	S157	0.61892	0.0460138
Tb927.10.15730	>Tb927.10.15730 | organism=Trypanosoma_brucei_TREU927 | product=hypothetical protein, conserved | location=Tb927_10_v5.1:3871247-3881629(+) | length=3460 | sequence_SO=chromosome | SO=protein_coding	S2377	0.621513	0.0147349
Tb927.4.4040	>Tb927.4.4040 | organism=Trypanosoma_brucei_TREU927 | product=hypothetical protein, conserved | location=Tb927_04_v5.1:1073082-1073861(-) | length=259 | sequence_SO=chromosome | SO=protein_coding	S36	0.621529	0.0355023
Tb927.8.2390	>Tb927.8.2390 | organism=Trypanosoma_brucei_TREU927 | product=hypothetical protein, conserved | location=Tb927_08_v5.1:717345-721940(+) | length=1531 | sequence_SO=chromosome | SO=protein_coding	S641	0.621847	0.0215521
Tb927.4.2920	>Tb927.4.2920 | organism=Trypanosoma_brucei_TREU927 | product=hypothetical protein, conserved | location=Tb927_04_v5.1:774789-777689(+) | length=966 | sequence_SO=chromosome | SO=protein_coding	S189	0.622628	0.0360924
Tb927.11.16210	>Tb927.11.16210 | organism=Trypanosoma_brucei_TREU927 | product=cyclic nucleotide-binding protein, putative | location=Tb927_11_v5.1:4290249-4292366(-) | length=705 | sequence_SO=chromosome | SO=protein_coding	S589	0.625042	0.0127573
Tb927.7.3550	>Tb927.7.3550 | organism=Trypanosoma_brucei_TREU927 | product=hypothetical protein, conserved | location=Tb927_07_v5.1:914750-918475(-) | length=1241 | sequence_SO=chromosome | SO=protein_coding	S2	0.625193	0.0210363
Tb927.4.3140	>Tb927.4.3140 | organism=Trypanosoma_brucei_TREU927 | product=hypothetical protein, conserved | location=Tb927_04_v5.1:825953-827359(+) | length=468 | sequence_SO=chromosome | SO=protein_coding	S349	0.627243	0.0337417
Tb927.10.14230	>Tb927.10.14230 | organism=Trypanosoma_brucei_TREU927 | product=hypothetical protein, conserved | location=Tb927_10_v5.1:3452681-3456796(-) | length=1371 | sequence_SO=chromosome | SO=protein_coding	S451	0.629098	0.0427969
Tb927.10.13790	>Tb927.10.13790 | organism=Trypanosoma_brucei_TREU927 | product=hypothetical protein, conserved | location=Tb927_10_v5.1:3366096-3368138(-) | length=680 | sequence_SO=chromosome | SO=protein_coding	S397	0.631947	0.0298787
Tb927.8.860	>Tb927.8.860 | organism=Trypanosoma_brucei_TREU927 | product=hypothetical protein, conserved | location=Tb927_08_v5.1:250035-250709(-) | length=224 | sequence_SO=chromosome | SO=protein_coding	S179	0.633676	0.0341766
Tb927.9.12070	>Tb927.9.12070 | organism=Trypanosoma_brucei_TREU927 | product=hypothetical protein, conserved | location=Tb927_09_v5.1:1880408-1883400(+) | length=995 | sequence_SO=chromosome | SO=protein_coding	S949	0.634529	0.0268018
Tb927.3.1800	>Tb927.3.1800 | organism=Trypanosoma_brucei_TREU927 | product=hypothetical protein, conserved | location=Tb927_03_v5.1:465260-469645(-) | length=1461 | sequence_SO=chromosome | SO=protein_coding	S73	0.636812	0.0469592
Tb927.11.3760	>Tb927.11.3760 | organism=Trypanosoma_brucei_TREU927 | product=hypothetical protein | location=Tb927_11_v5.1:1107164-1107886(+) | length=240 | sequence_SO=chromosome | SO=protein_coding	S116	0.640409	0.0184782
Tb927.11.11860	>Tb927.11.11860 | organism=Trypanosoma_brucei_TREU927 | product=leucine-rich repeat protein (LRRP), putative | location=Tb927_11_v5.1:3179037-3181130(+) | length=697 | sequence_SO=chromosome | SO=protein_coding	S647	0.640943	0.0146938
Tb927.5.500	>Tb927.5.500 | organism=Trypanosoma_brucei_TREU927 | product=hypothetical protein, conserved | location=Tb927_05_v5.1:213281-217492(-) | length=1403 | sequence_SO=chromosome | SO=protein_coding;>Tb11.v5.0218 | organism=Trypanosoma_brucei_TREU927 | product=	S762	0.645743	0.0147349
Tb927.4.3810	>Tb927.4.3810 | organism=Trypanosoma_brucei_TREU927 | product=DNA-directed RNA polymerase II subunit 2, putative,RNA polymerase subunit, putative (RPB2) | location=Tb927_04_v5.1:994869-998441(-) | length=1190 | sequence_SO=chromosome | SO=protein_coding	S899	0.646179	0.0133396
Tb927.8.2660	>Tb927.8.2660 | organism=Trypanosoma_brucei_TREU927 | product=hypothetical protein, conserved | location=Tb927_08_v5.1:785065-790824(+) | length=1919 | sequence_SO=chromosome | SO=protein_coding;>Tb11.v5.0471 | organism=Trypanosoma_brucei_TREU927 | product	S1388	0.646251	0.028323
Tb927.5.1250	>Tb927.5.1250 | organism=Trypanosoma_brucei_TREU927 | product=hypothetical protein, conserved | location=Tb927_05_v5.1:469905-471635(+) | length=576 | sequence_SO=chromosome | SO=protein_coding	S299	0.64735	0.0190688
Tb927.11.11860	>Tb927.11.11860 | organism=Trypanosoma_brucei_TREU927 | product=leucine-rich repeat protein (LRRP), putative | location=Tb927_11_v5.1:3179037-3181130(+) | length=697 | sequence_SO=chromosome | SO=protein_coding	S359	0.647503	0.0240385
Tb927.10.3820	>Tb927.10.3820 | organism=Trypanosoma_brucei_TREU927 | product=hypothetical protein, conserved | location=Tb927_10_v5.1:1004326-1010769(-) | length=2147 | sequence_SO=chromosome | SO=protein_coding	S1592	0.650481	0.0223725
Tb927.7.6630	>Tb927.7.6630 | organism=Trypanosoma_brucei_TREU927 | product=hypothetical protein, conserved | location=Tb927_07_v5.1:1812381-1814918(-) | length=845 | sequence_SO=chromosome | SO=protein_coding	S572	0.650788	0.0469592
Tb927.10.5200	>Tb927.10.5200 | organism=Trypanosoma_brucei_TREU927 | product=hypothetical protein, conserved | location=Tb927_10_v5.1:1287816-1289111(+) | length=431 | sequence_SO=chromosome | SO=protein_coding;>Tb11.v5.0237 | organism=Trypanosoma_brucei_TREU927 | produ	S246	0.653466	0.0244934
Tb927.7.5340	>Tb927.7.5340 | organism=Trypanosoma_brucei_TREU927 | product=hypothetical protein, conserved | location=Tb927_07_v5.1:1419326-1420822(+) | length=498 | sequence_SO=chromosome | SO=protein_coding	S105	0.655974	0.0169006
Tb927.7.1420	>Tb927.7.1420 | organism=Trypanosoma_brucei_TREU927 | product=hypothetical protein, conserved | location=Tb927_07_v5.1:359796-364544(+) | length=1582 | sequence_SO=chromosome | SO=protein_coding	S1110	0.658641	0.0449723
Tb927.11.11860	>Tb927.11.11860 | organism=Trypanosoma_brucei_TREU927 | product=leucine-rich repeat protein (LRRP), putative | location=Tb927_11_v5.1:3179037-3181130(+) | length=697 | sequence_SO=chromosome | SO=protein_coding	S652	0.660194	0.0182294
Tb927.3.4970	>Tb927.3.4970 | organism=Trypanosoma_brucei_TREU927 | product=hypothetical protein, conserved | location=Tb927_03_v5.1:1394942-1398573(+) | length=1063 | sequence_SO=chromosome | SO=protein_coding	S461	0.660756	0.0148672
Tb927.10.1210	>Tb927.10.1210 | organism=Trypanosoma_brucei_TREU927 | product=katanin, putative | location=Tb927_10_v5.1:324766-326808(-) | length=680 | sequence_SO=chromosome | SO=protein_coding	S319	0.663643	0.0234835
Tb927.10.13610	>Tb927.10.13610 | organism=Trypanosoma_brucei_TREU927 | product=hypothetical protein, conserved | location=Tb927_10_v5.1:3324978-3327176(-) | length=732 | sequence_SO=chromosome | SO=protein_coding	S318	0.665082	0.0325845
Tb927.2.5760	>Tb927.2.5760 | organism=Trypanosoma_brucei_TREU927 | product=hypothetical protein, conserved | location=Tb927_02_v5.1:1034074-1043301(+) | length=3075 | sequence_SO=chromosome | SO=protein_coding	S531	0.665248	0.0216674
Tb927.9.1750	>Tb927.9.1750 | organism=Trypanosoma_brucei_TREU927 | product=hypothetical protein, conserved | location=Tb927_09_v5.1:398584-412023(-) | length=4479 | sequence_SO=chromosome | SO=protein_coding	S3147	0.668507	0.0312124
Tb927.7.5150	>Tb927.7.5150 | organism=Trypanosoma_brucei_TREU927 | product=hypothetical protein, conserved | location=Tb927_07_v5.1:1356180-1360544(+) | length=1454 | sequence_SO=chromosome | SO=protein_coding	S1093	0.669151	0.0170003
Tb927.5.2680	>Tb927.5.2680 | organism=Trypanosoma_brucei_TREU927 | product=hypothetical protein, conserved | location=Tb927_05_v5.1:909611-911866(+) | length=751 | sequence_SO=chromosome | SO=protein_coding	S320	0.670389	0.012065
Tb927.10.9330	>Tb927.10.9330 | organism=Trypanosoma_brucei_TREU927 | product=hypothetical protein, conserved | location=Tb927_10_v5.1:2309655-2311466(+) | length=603 | sequence_SO=chromosome | SO=protein_coding	S65	0.670587	0.0354103
Tb927.7.4910	>Tb927.7.4910 | organism=Trypanosoma_brucei_TREU927 | product=hypothetical protein, conserved | location=Tb927_07_v5.1:1294355-1295464(-) | length=369 | sequence_SO=chromosome | SO=protein_coding;>Tb11.v5.0172 | organism=Trypanosoma_brucei_TREU927 | produc	S331	0.672805	0.0256147
Tb927.10.3010	>Tb927.10.3010 | organism=Trypanosoma_brucei_TREU927 | product=hypothetical protein, conserved | location=Tb927_10_v5.1:786335-790006(+) | length=1223 | sequence_SO=chromosome | SO=protein_coding	S904	0.673943	0.0484252
Tb927.8.1360	>Tb927.8.1360 | organism=Trypanosoma_brucei_TREU927 | product=hypothetical protein, conserved | location=Tb927_08_v5.1:432175-444849(-) | length=4224 | sequence_SO=chromosome | SO=protein_coding	S2274	0.674235	0.0250004
Tb927.1.3880	>Tb927.1.3880 | organism=Trypanosoma_brucei_TREU927 | product=hypothetical protein, conserved | location=Tb927_01_v5.1:827008-832221(+) | length=1737 | sequence_SO=chromosome | SO=protein_coding	S294	0.675925	0.0383641
Tb927.10.1350	>Tb927.10.1350 | organism=Trypanosoma_brucei_TREU927 | product=hypothetical protein, conserved | location=Tb927_10_v5.1:356875-358827(-) | length=650 | sequence_SO=chromosome | SO=protein_coding	S39	0.678561	0.0240385
Tb927.11.11430	>Tb927.11.11430 | organism=Trypanosoma_brucei_TREU927 | product=cullin 1, putative | location=Tb927_11_v5.1:3060388-3062805(+) | length=805 | sequence_SO=chromosome | SO=protein_coding	S722	0.678613	0.0458113
Tb927.8.2780	>Tb927.8.2780 | organism=Trypanosoma_brucei_TREU927 | product=RNA-binding protein RBP10, putative (RBP10) | location=Tb927_08_v5.1:828594-829518(+) | length=306 | sequence_SO=chromosome | SO=protein_coding	S161	0.683771	0.0384584
Tb927.2.5760	>Tb927.2.5760 | organism=Trypanosoma_brucei_TREU927 | product=hypothetical protein, conserved | location=Tb927_02_v5.1:1034074-1043301(+) | length=3075 | sequence_SO=chromosome | SO=protein_coding	S2656	0.6886	0.0112152
Tb927.10.1970	>Tb927.10.1970 | organism=Trypanosoma_brucei_TREU927 | product=hypothetical protein, conserved | location=Tb927_10_v5.1:513794-518011(+) | length=1405 | sequence_SO=chromosome | SO=protein_coding	T404	0.689558	0.0112152
Tb927.11.10120	>Tb927.11.10120 | organism=Trypanosoma_brucei_TREU927 | product=hypothetical protein, conserved | location=Tb927_11_v5.1:2710406-2712814(+) | length=802 | sequence_SO=chromosome | SO=protein_coding	S177	0.689772	0.0258123
Tb927.10.9330	>Tb927.10.9330 | organism=Trypanosoma_brucei_TREU927 | product=hypothetical protein, conserved | location=Tb927_10_v5.1:2309655-2311466(+) | length=603 | sequence_SO=chromosome | SO=protein_coding	T67	0.693734	0.0133396
Tb927.6.3670	>Tb927.6.3670 | organism=Trypanosoma_brucei_TREU927 | product=paraflagellar rod component, putative (PFC8) | location=Tb927_06_v5.1:1090477-1100145(-) | length=3222 | sequence_SO=chromosome | SO=protein_coding	S2304	0.6949	0.0339235
Tb927.7.4910	>Tb927.7.4910 | organism=Trypanosoma_brucei_TREU927 | product=hypothetical protein, conserved | location=Tb927_07_v5.1:1294355-1295464(-) | length=369 | sequence_SO=chromosome | SO=protein_coding;>Tb11.v5.0172 | organism=Trypanosoma_brucei_TREU927 | produc	S336	0.696327	0.0254997
Tb927.2.5760	>Tb927.2.5760 | organism=Trypanosoma_brucei_TREU927 | product=hypothetical protein, conserved | location=Tb927_02_v5.1:1034074-1043301(+) | length=3075 | sequence_SO=chromosome | SO=protein_coding	S2437	0.706544	0.0234835
Tb927.11.8950	>Tb927.11.8950 | organism=Trypanosoma_brucei_TREU927 | product=leucine rich repeat (TbLRRP1) | location=Tb927_11_v5.1:2454099-2456240(+) | length=713 | sequence_SO=chromosome | SO=protein_coding	S483	0.708287	0.0223725
Tb927.11.5740	>Tb927.11.5740 | organism=Trypanosoma_brucei_TREU927 | product=formin, putative,formin-like protein | location=Tb927_11_v5.1:1624461-1627475(+) | length=1004 | sequence_SO=chromosome | SO=protein_coding	S403	0.709919	0.0232286
Tb927.9.9290	>Tb927.9.9290 | organism=Trypanosoma_brucei_TREU927 | product=Polyadenylate-binding protein 1 (Poly(A)-binding protein 1) (PABP 1) (PABP1) | location=Tb927_09_v5.1:1478262-1479962(-) | length=566 | sequence_SO=chromosome | SO=protein_coding	T484	0.710083	0.0268086
Tb927.8.4460	>Tb927.8.4460 | organism=Trypanosoma_brucei_TREU927 | product=hypothetical protein, conserved | location=Tb927_08_v5.1:1320983-1324012(-) | length=1009 | sequence_SO=chromosome | SO=protein_coding	S842	0.713229	0.0170003
Tb927.7.1190	>Tb927.7.1190 | organism=Trypanosoma_brucei_TREU927 | product=regulator of chromosome condensation, putative | location=Tb927_07_v5.1:302109-305567(+) | length=1152 | sequence_SO=chromosome | SO=protein_coding	S294	0.71673	0.0312124
Tb927.8.7950	>Tb927.8.7950 | organism=Trypanosoma_brucei_TREU927 | product=hypothetical protein, conserved | location=Tb927_08_v5.1:2338138-2343381(+) | length=1747 | sequence_SO=chromosome | SO=protein_coding	S1566	0.719302	0.0312124
Tb927.8.7950	>Tb927.8.7950 | organism=Trypanosoma_brucei_TREU927 | product=hypothetical protein, conserved | location=Tb927_08_v5.1:2338138-2343381(+) | length=1747 | sequence_SO=chromosome | SO=protein_coding	S1573	0.719302	0.0312124
Tb927.10.15230	>Tb927.10.15230 | organism=Trypanosoma_brucei_TREU927 | product=hypothetical protein, conserved | location=Tb927_10_v5.1:3711120-3711932(+) | length=270 | sequence_SO=chromosome | SO=protein_coding	S192	0.720749	0.0224484
Tb927.7.3740	>Tb927.7.3740 | organism=Trypanosoma_brucei_TREU927 | product=hypothetical protein, conserved | location=Tb927_07_v5.1:978092-980641(-) | length=849 | sequence_SO=chromosome | SO=protein_coding	S577	0.724663	0.0327409
Tb927.9.7550	>Tb927.9.7550 | organism=Trypanosoma_brucei_TREU927 | product=adenylosuccinate lyase, putative (ASL) | location=Tb927_09_v5.1:1242089-1243504(-) | length=471 | sequence_SO=chromosome | SO=protein_coding	S5	0.731507	0.0341766
Tb927.3.5260	>Tb927.3.5260 | organism=Trypanosoma_brucei_TREU927 | product=hypothetical protein, conserved | location=Tb927_03_v5.1:1479767-1481176(+) | length=469 | sequence_SO=chromosome | SO=protein_coding	S286	0.73423	0.00938347
Tb927.3.5260	>Tb927.3.5260 | organism=Trypanosoma_brucei_TREU927 | product=hypothetical protein, conserved | location=Tb927_03_v5.1:1479767-1481176(+) | length=469 | sequence_SO=chromosome | SO=protein_coding	S287	0.73423	0.00938347
Tb927.10.1970	>Tb927.10.1970 | organism=Trypanosoma_brucei_TREU927 | product=hypothetical protein, conserved | location=Tb927_10_v5.1:513794-518011(+) | length=1405 | sequence_SO=chromosome | SO=protein_coding	S428	0.737407	0.014511
Tb927.3.4970	>Tb927.3.4970 | organism=Trypanosoma_brucei_TREU927 | product=hypothetical protein, conserved | location=Tb927_03_v5.1:1394942-1398573(+) | length=1063 | sequence_SO=chromosome | SO=protein_coding	S936	0.737537	0.049548
Tb927.7.6680	>Tb927.7.6680 | organism=Trypanosoma_brucei_TREU927 | product=protein kinase, putative | location=Tb927_07_v5.1:1839285-1841984(-) | length=899 | sequence_SO=chromosome | SO=protein_coding	S72	0.746184	0.00938347
Tb927.2.5760	>Tb927.2.5760 | organism=Trypanosoma_brucei_TREU927 | product=hypothetical protein, conserved | location=Tb927_02_v5.1:1034074-1043301(+) | length=3075 | sequence_SO=chromosome | SO=protein_coding	S192	0.746496	0.00938347
Tb927.8.4360	>Tb927.8.4360 | organism=Trypanosoma_brucei_TREU927 | product=hypothetical protein, conserved | location=Tb927_08_v5.1:1296564-1301385(-) | length=1368 | sequence_SO=chromosome | SO=protein_coding	S1159	0.747282	0.00900719
Tb927.8.2660	>Tb927.8.2660 | organism=Trypanosoma_brucei_TREU927 | product=hypothetical protein, conserved | location=Tb927_08_v5.1:785065-790824(+) | length=1919 | sequence_SO=chromosome | SO=protein_coding	S208	0.748977	0.0194756
Tb927.10.12330	>Tb927.10.12330 | organism=Trypanosoma_brucei_TREU927 | product=zinc finger protein family member, putative (ZC3H34) | location=Tb927_10_v5.1:2992296-2992904(-) | length=202 | sequence_SO=chromosome | SO=protein_coding	S201	0.751804	0.0449723
Tb927.10.2880	>Tb927.10.2880 | organism=Trypanosoma_brucei_TREU927 | product=calcium channel protein, putative | location=Tb927_10_v5.1:737081-745162(+) | length=2693 | sequence_SO=chromosome | SO=protein_coding	S2631	0.768761	0.0405497
Tb927.7.6640	>Tb927.7.6640 | organism=Trypanosoma_brucei_TREU927 | product=hypothetical protein, conserved | location=Tb927_07_v5.1:1816071-1820924(-) | length=1617 | sequence_SO=chromosome | SO=protein_coding	S885	0.770555	0.0272758
Tb927.8.1590	>Tb927.8.1590 | organism=Trypanosoma_brucei_TREU927 | product=ubiquitin-protein ligase, putative (upl3) | location=Tb927_08_v5.1:516817-529731(+) | length=4304 | sequence_SO=chromosome | SO=protein_coding	S3812	0.776388	0.0129005
Tb927.8.3700	>Tb927.8.3700 | organism=Trypanosoma_brucei_TREU927 | product=hypothetical protein, conserved | location=Tb927_08_v5.1:1106544-1111004(-) | length=1486 | sequence_SO=chromosome | SO=protein_coding	S1444	0.777457	0.0129005
Tb927.11.6820	>Tb927.11.6820 | organism=Trypanosoma_brucei_TREU927 | product=hypothetical protein, conserved | location=Tb927_11_v5.1:1924193-1925614(-) | length=473 | sequence_SO=chromosome | SO=protein_coding;>Tb11.v5.0900 | organism=Trypanosoma_brucei_TREU927 | produ	S316	0.777798	0.00646948
Tb927.11.9510	>Tb927.11.9510 | organism=Trypanosoma_brucei_TREU927 | product=nucleic acid binding protein, putative | location=Tb927_11_v5.1:2594276-2595826(-) | length=516 | sequence_SO=chromosome | SO=protein_coding	S250	0.778844	0.0193917
Tb927.4.3150	>Tb927.4.3150 | organism=Trypanosoma_brucei_TREU927 | product=hypothetical protein, conserved | location=Tb927_04_v5.1:827846-828877(+) | length=343 | sequence_SO=chromosome | SO=protein_coding	S121	0.780255	0.00808573
Tb927.10.9330	>Tb927.10.9330 | organism=Trypanosoma_brucei_TREU927 | product=hypothetical protein, conserved | location=Tb927_10_v5.1:2309655-2311466(+) | length=603 | sequence_SO=chromosome | SO=protein_coding	S61	0.781165	0.00938347
Tb927.8.2820	>Tb927.8.2820 | organism=Trypanosoma_brucei_TREU927 | product=hypothetical protein, conserved | location=Tb927_08_v5.1:842913-846791(+) | length=1292 | sequence_SO=chromosome | SO=protein_coding	S158	0.781603	0.0267168
Tb927.9.12070	>Tb927.9.12070 | organism=Trypanosoma_brucei_TREU927 | product=hypothetical protein, conserved | location=Tb927_09_v5.1:1880408-1883400(+) | length=995 | sequence_SO=chromosome | SO=protein_coding	S948	0.78399	0.00808573
Tb927.10.15390	>Tb927.10.15390 | organism=Trypanosoma_brucei_TREU927 | product=kinesin, putative | location=Tb927_10_v5.1:3773873-3777160(+) | length=1095 | sequence_SO=chromosome | SO=protein_coding;>Tb11.v5.0434 | organism=Trypanosoma_brucei_TREU927 | product=kinesin,	S793	0.786696	0.0395193
Tb927.7.6290	>Tb927.7.6290 | organism=Trypanosoma_brucei_TREU927 | product=kinesin, putative (TbKIF9A) | location=Tb927_07_v5.1:1702287-1704962(-) | length=891 | sequence_SO=chromosome | SO=protein_coding	S193	0.790917	0.00724235
Tb927.6.1660	>Tb927.6.1660 | organism=Trypanosoma_brucei_TREU927 | product=hypothetical protein, conserved | location=Tb927_06_v5.1:560254-561966(-) | length=570 | sequence_SO=chromosome | SO=protein_coding	S404	0.793881	0.00549396
Tb927.6.350	>Tb927.6.350 | organism=Trypanosoma_brucei_TREU927 | product=hypothetical protein, conserved | location=Tb927_06_v5.1:174546-175403(-) | length=285 | sequence_SO=chromosome | SO=protein_coding	S54	0.802176	0.0349037
Tb927.11.1380	>Tb927.11.1380 | organism=Trypanosoma_brucei_TREU927 | product=hypothetical protein, conserved | location=Tb927_11_v5.1:399081-408077(+) | length=2998 | sequence_SO=chromosome | SO=protein_coding	T1706	0.819847	0.00715887
Tb927.10.11580	>Tb927.10.11580 | organism=Trypanosoma_brucei_TREU927 | product=predicted WD40 repeat protein | location=Tb927_10_v5.1:2821034-2826025(+) | length=1663 | sequence_SO=chromosome | SO=protein_coding	S1400	0.826106	0.00938347
Tb927.10.6550	>Tb927.10.6550 | organism=Trypanosoma_brucei_TREU927 | product=hypothetical protein, conserved | location=Tb927_10_v5.1:1658030-1658752(+) | length=240 | sequence_SO=chromosome | SO=protein_coding	S115	0.829917	0.0163577
Tb927.9.3580	>Tb927.9.3580 | organism=Trypanosoma_brucei_TREU927 | product=hypothetical protein, conserved | location=Tb927_09_v5.1:721392-723131(+) | length=579 | sequence_SO=chromosome | SO=protein_coding	S483	0.832465	0.0325845
Tb927.10.1970	>Tb927.10.1970 | organism=Trypanosoma_brucei_TREU927 | product=hypothetical protein, conserved | location=Tb927_10_v5.1:513794-518011(+) | length=1405 | sequence_SO=chromosome | SO=protein_coding	S405	0.836829	0.00603948
Tb927.7.6290	>Tb927.7.6290 | organism=Trypanosoma_brucei_TREU927 | product=kinesin, putative (TbKIF9A) | location=Tb927_07_v5.1:1702287-1704962(-) | length=891 | sequence_SO=chromosome | SO=protein_coding	S658	0.850785	0.0155553
Tb927.3.690	>Tb927.3.690 | organism=Trypanosoma_brucei_TREU927 | product=protein kinase, putative | location=Tb927_03_v5.1:168665-170416(-) | length=583 | sequence_SO=chromosome | SO=protein_coding	S421	0.854401	0.0112152
Tb927.10.12710	>Tb927.10.12710 | organism=Trypanosoma_brucei_TREU927 | product=heat shock protein 110, putative | location=Tb927_10_v5.1:3085110-3087545(-) | length=811 | sequence_SO=chromosome | SO=protein_coding	S390	0.860967	0.00938347
Tb927.8.1540	>Tb927.8.1540 | organism=Trypanosoma_brucei_TREU927 | product=hypothetical protein, conserved | location=Tb927_08_v5.1:499315-501987(+) | length=890 | sequence_SO=chromosome | SO=protein_coding	S692	0.86159	0.0264586
Tb927.11.16890	>Tb927.11.16890 | organism=Trypanosoma_brucei_TREU927 | product=hypothetical protein, conserved | location=Tb927_11_v5.1:4497532-4503711(-) | length=2059 | sequence_SO=chromosome | SO=protein_coding;>Tb927.11.16900 | organism=Trypanosoma_brucei_TREU927 | p	S69	0.865943	0.00808573
Tb927.10.720	>Tb927.10.720 | organism=Trypanosoma_brucei_TREU927 | product=hypothetical protein, conserved | location=Tb927_10_v5.1:183174-186425(+) | length=1083 | sequence_SO=chromosome | SO=protein_coding	S790	0.866646	0.0337417
Tb927.5.2820	>Tb927.5.2820 | organism=Trypanosoma_brucei_TREU927 | product=protein kinase, putative | location=Tb927_05_v5.1:947334-950426(-) | length=1030 | sequence_SO=chromosome | SO=protein_coding	S821	0.86694	0.0194756
Tb927.11.11220	>Tb927.11.11220 | organism=Trypanosoma_brucei_TREU927 | product=dynein heavy chain, putative | location=Tb927_11_v5.1:2996095-3008823(+) | length=4242 | sequence_SO=chromosome | SO=protein_coding	T482	0.866943	0.0371926
Tb927.8.7970	>Tb927.8.7970 | organism=Trypanosoma_brucei_TREU927 | product=hypothetical protein | location=Tb927_08_v5.1:2347985-2349469(+) | length=494 | sequence_SO=chromosome | SO=protein_coding	T411	0.867164	0.0477785
Tb927.10.7230	>Tb927.10.7230 | organism=Trypanosoma_brucei_TREU927 | product=hypothetical protein, conserved | location=Tb927_10_v5.1:1818867-1826432(-) | length=2521 | sequence_SO=chromosome | SO=protein_coding	S945	0.883166	0.00603948
Tb927.8.4540	>Tb927.8.4540 | organism=Trypanosoma_brucei_TREU927 | product=PAB1-binding protein , putative | location=Tb927_08_v5.1:1342648-1344300(-) | length=550 | sequence_SO=chromosome | SO=protein_coding	S496	0.888092	0.0231127
Tb927.11.5660	>Tb927.11.5660 | organism=Trypanosoma_brucei_TREU927 | product=hypothetical protein, conserved | location=Tb927_11_v5.1:1599571-1600797(+) | length=408 | sequence_SO=chromosome | SO=protein_coding	S400	0.889727	0.0333124
Tb927.9.9730	>Tb927.9.9730 | organism=Trypanosoma_brucei_TREU927 | product=hypothetical protein, conserved | location=Tb927_09_v5.1:1546611-1547812(-) | length=399 | sequence_SO=chromosome | SO=protein_coding	S210	0.902716	0.00938347
Tb927.10.6310	>Tb927.10.6310 | organism=Trypanosoma_brucei_TREU927 | product=major vault protein, putative (MVP) | location=Tb927_10_v5.1:1595280-1597868(-) | length=862 | sequence_SO=chromosome | SO=protein_coding;>Tb11.v5.0275 | organism=Trypanosoma_brucei_TREU927 | p	T516	0.904668	0.00549396
Tb927.11.16840.1	>Tb927.11.16840.1 | organism=Trypanosoma_brucei_TREU927 | product=unspecified product | location=Tb927_11_v5.1:4485224-4488628(-) | length=910 | sequence_SO=chromosome | SO=protein_coding;>Tb927.11.16840.2 | organism=Trypanosoma_brucei_TREU927 | product=un	S891	0.905931	0.00802671
Tb927.11.8750	>Tb927.11.8750 | organism=Trypanosoma_brucei_TREU927 | product=hypothetical protein, conserved | location=Tb927_11_v5.1:2407391-2407789(+) | length=132 | sequence_SO=chromosome | SO=protein_coding	S100	0.906799	0.0312124
Tb927.10.5230	>Tb927.10.5230 | organism=Trypanosoma_brucei_TREU927 | product=ADP-ribosylation factor, putative | location=Tb927_10_v5.1:1295187-1295999(+) | length=270 | sequence_SO=chromosome | SO=protein_coding	S64	0.906852	0.0268086
Tb927.8.3700	>Tb927.8.3700 | organism=Trypanosoma_brucei_TREU927 | product=hypothetical protein, conserved | location=Tb927_08_v5.1:1106544-1111004(-) | length=1486 | sequence_SO=chromosome | SO=protein_coding	S1443	0.91414	0.00903896
Tb927.7.2350	>Tb927.7.2350 | organism=Trypanosoma_brucei_TREU927 | product=hypothetical protein, conserved | location=Tb927_07_v5.1:604873-607932(-) | length=1019 | sequence_SO=chromosome | SO=protein_coding	S910	0.915707	0.0362373
Tb927.1.2100	>Tb927.1.2100 | organism=Trypanosoma_brucei_TREU927 | product=calpain-like cysteine peptidase, putative,cysteine peptidase, Clan CA, family C2, putative | location=Tb927_01_v5.1:531578-535023(+) | length=1146 | sequence_SO=chromosome | SO=protein_coding	S303	0.919864	0.0223426
Tb927.6.1660	>Tb927.6.1660 | organism=Trypanosoma_brucei_TREU927 | product=hypothetical protein, conserved | location=Tb927_06_v5.1:560254-561966(-) | length=570 | sequence_SO=chromosome | SO=protein_coding	S400	0.923792	0.00603948
Tb927.8.1560	>Tb927.8.1560 | organism=Trypanosoma_brucei_TREU927 | product=hypothetical protein, conserved | location=Tb927_08_v5.1:508257-510107(+) | length=616 | sequence_SO=chromosome | SO=protein_coding	T124	0.935578	0.0133396
Tb927.3.5310	>Tb927.3.5310 | organism=Trypanosoma_brucei_TREU927 | product=paraflagellar rod protein | location=Tb927_03_v5.1:1488667-1495053(+) | length=2128 | sequence_SO=chromosome | SO=protein_coding	T1276	0.939691	0.0241166
Tb927.2.4930	>Tb927.2.4930 | organism=Trypanosoma_brucei_TREU927 | product=esterase, putative | location=Tb927_02_v5.1:870376-871113(-) | length=245 | sequence_SO=chromosome | SO=protein_coding	S185	0.941112	0.00938347
Tb927.8.2590	>Tb927.8.2590 | organism=Trypanosoma_brucei_TREU927 | product=hypothetical protein, conserved | location=Tb927_08_v5.1:762449-764086(+) | length=545 | sequence_SO=chromosome | SO=protein_coding	S151	0.942797	0.0405497
Tb927.7.2400	>Tb927.7.2400 | organism=Trypanosoma_brucei_TREU927 | product=tyrosyl-tRNA synthetase, putative | location=Tb927_07_v5.1:617425-618752(-) | length=425 | sequence_SO=chromosome | SO=protein_coding	S253	0.958581	0.0150056
Tb927.10.2380	>Tb927.10.2380 | organism=Trypanosoma_brucei_TREU927 | product=hypothetical protein, conserved | location=Tb927_10_v5.1:609416-612168(+) | length=916 | sequence_SO=chromosome | SO=protein_coding	T113	0.959188	0.0312124
Tb927.10.6310	>Tb927.10.6310 | organism=Trypanosoma_brucei_TREU927 | product=major vault protein, putative (MVP) | location=Tb927_10_v5.1:1595280-1597868(-) | length=862 | sequence_SO=chromosome | SO=protein_coding;>Tb11.v5.0275 | organism=Trypanosoma_brucei_TREU927 | p	S517	0.965092	0.00938347
Tb927.4.2300	>Tb927.4.2300 | organism=Trypanosoma_brucei_TREU927 | product=hypothetical protein, conserved | location=Tb927_04_v5.1:597554-599869(+) | length=706 | sequence_SO=chromosome | SO=protein_coding	S544	0.967524	0.00554313
Tb927.10.9640	>Tb927.10.9640 | organism=Trypanosoma_brucei_TREU927 | product=hypothetical protein, conserved | location=Tb927_10_v5.1:2375341-2376366(+) | length=341 | sequence_SO=chromosome | SO=protein_coding	T25	0.970226	0.0223725
Tb927.6.1660	>Tb927.6.1660 | organism=Trypanosoma_brucei_TREU927 | product=hypothetical protein, conserved | location=Tb927_06_v5.1:560254-561966(-) | length=570 | sequence_SO=chromosome | SO=protein_coding	T406	0.970623	0.00549396
Tb927.8.5580	>Tb927.8.5580 | organism=Trypanosoma_brucei_TREU927 | product=hypothetical protein, conserved | location=Tb927_08_v5.1:1644049-1658481(+) | length=4810 | sequence_SO=chromosome | SO=protein_coding	S4400	0.980159	0.00549396
Tb927.11.3990	>Tb927.11.3990 | organism=Trypanosoma_brucei_TREU927 | product=hypothetical protein, conserved | location=Tb927_11_v5.1:1167200-1168141(+) | length=313 | sequence_SO=chromosome | SO=protein_coding	T236	0.98043	0.0268086
Tb927.10.6870	>Tb927.10.6870 | organism=Trypanosoma_brucei_TREU927 | product=short-chain dehydrogenase, putative | location=Tb927_10_v5.1:1727815-1728912(+) | length=365 | sequence_SO=chromosome | SO=protein_coding	S79	0.981549	0.0125436
Tb927.3.1900	>Tb927.3.1900 | organism=Trypanosoma_brucei_TREU927 | product=hypothetical protein, conserved | location=Tb927_03_v5.1:493707-496310(-) | length=867 | sequence_SO=chromosome | SO=protein_coding	S248	0.982137	0.043592
Tb927.11.12490	>Tb927.11.12490 | organism=Trypanosoma_brucei_TREU927 | product=hypothetical protein, conserved | location=Tb927_11_v5.1:3349505-3351166(+) | length=553 | sequence_SO=chromosome | SO=protein_coding	S31	0.987619	0.0187915
Tb927.11.14220	>Tb927.11.14220 | organism=Trypanosoma_brucei_TREU927 | product=hypothetical protein, conserved | location=Tb927_11_v5.1:3772204-3774039(+) | length=516 | sequence_SO=chromosome | SO=protein_coding	S89	0.995013	0.0395126
Tb927.2.5150	>Tb927.2.5150 | organism=Trypanosoma_brucei_TREU927 | product=TPR-repeat protein, putative | location=Tb927_02_v5.1:908758-910654(+) | length=489 | sequence_SO=chromosome | SO=protein_coding	S232	0.999838	0.00938347
Tb927.9.1970	>Tb927.9.1970 | organism=Trypanosoma_brucei_TREU927 | product=syntaxin binding protein 1, putative | location=Tb927_09_v5.1:445805-447733(-) | length=642 | sequence_SO=chromosome | SO=protein_coding	S340	1.01664	0.0116176
Tb927.3.5120	>Tb927.3.5120 | organism=Trypanosoma_brucei_TREU927 | product=hypothetical protein, conserved | location=Tb927_03_v5.1:1435684-1437804(+) | length=706 | sequence_SO=chromosome | SO=protein_coding	S172	1.03316	0.00903896
Tb927.11.14210	>Tb927.11.14210 | organism=Trypanosoma_brucei_TREU927 | product=hypothetical protein, conserved | location=Tb927_11_v5.1:3766797-3771167(+) | length=1456 | sequence_SO=chromosome | SO=protein_coding	T1151	1.04541	0.0158179
Tb927.8.2660	>Tb927.8.2660 | organism=Trypanosoma_brucei_TREU927 | product=hypothetical protein, conserved | location=Tb927_08_v5.1:785065-790824(+) | length=1919 | sequence_SO=chromosome | SO=protein_coding;>Tb11.v5.0471 | organism=Trypanosoma_brucei_TREU927 | product	S1380	1.04825	0.00783845
Tb927.6.4440	>Tb927.6.4440 | organism=Trypanosoma_brucei_TREU927 | product=hypothetical protein, conserved | location=Tb927_06_v5.1:1246165-1247223(-) | length=352 | sequence_SO=chromosome | SO=protein_coding	S243	1.06084	0.0383641
Tb927.8.7200	>Tb927.8.7200 | organism=Trypanosoma_brucei_TREU927 | product=hypothetical protein, conserved | location=Tb927_08_v5.1:2067646-2071017(+) | length=1123 | sequence_SO=chromosome | SO=protein_coding	S315	1.13014	0.0336615
Tb927.9.15490	>Tb927.9.15490 | organism=Trypanosoma_brucei_TREU927 | product=ADP-ribosylation factor GTPase activating protein, putative | location=Tb927_09_v5.1:2416469-2417710(+) | length=413 | sequence_SO=chromosome | SO=protein_coding	S169	1.13049	0.012505
Tb927.10.9330	>Tb927.10.9330 | organism=Trypanosoma_brucei_TREU927 | product=hypothetical protein, conserved | location=Tb927_10_v5.1:2309655-2311466(+) | length=603 | sequence_SO=chromosome | SO=protein_coding	S199	1.1365	0.0329758
Tb927.9.4420	>Tb927.9.4420 | organism=Trypanosoma_brucei_TREU927 | product=hypothetical protein, conserved | location=Tb927_09_v5.1:826128-827375(+) | length=415 | sequence_SO=chromosome | SO=protein_coding	S303	1.15877	0.0449723
Tb927.7.2400	>Tb927.7.2400 | organism=Trypanosoma_brucei_TREU927 | product=tyrosyl-tRNA synthetase, putative | location=Tb927_07_v5.1:617425-618752(-) | length=425 | sequence_SO=chromosome | SO=protein_coding	S252	1.16872	0.00948228
Tb927.8.5580	>Tb927.8.5580 | organism=Trypanosoma_brucei_TREU927 | product=hypothetical protein, conserved | location=Tb927_08_v5.1:1644049-1658481(+) | length=4810 | sequence_SO=chromosome | SO=protein_coding	S4713	1.18335	0.00549396
Tb927.6.4390	>Tb927.6.4390 | organism=Trypanosoma_brucei_TREU927 | product=kinesin, putative | location=Tb927_06_v5.1:1233753-1237088(-) | length=1111 | sequence_SO=chromosome | SO=protein_coding	S747	1.18978	0.0120198
Tb927.11.16890	>Tb927.11.16890 | organism=Trypanosoma_brucei_TREU927 | product=hypothetical protein, conserved | location=Tb927_11_v5.1:4497532-4503711(-) | length=2059 | sequence_SO=chromosome | SO=protein_coding	S788	1.19151	0.00724235
Tb927.8.8000	>Tb927.8.8000 | organism=Trypanosoma_brucei_TREU927 | product=hypothetical protein, conserved | location=Tb927_08_v5.1:2371282-2372910(+) | length=542 | sequence_SO=chromosome | SO=protein_coding	S334	1.19566	0.00938347
Tb927.7.3370	>Tb927.7.3370 | organism=Trypanosoma_brucei_TREU927 | product=hypothetical protein, conserved | location=Tb927_07_v5.1:879487-881277(-) | length=596 | sequence_SO=chromosome | SO=protein_coding	S398	1.21981	0.014511
Tb927.7.5150	>Tb927.7.5150 | organism=Trypanosoma_brucei_TREU927 | product=hypothetical protein, conserved | location=Tb927_07_v5.1:1356180-1360544(+) | length=1454 | sequence_SO=chromosome | SO=protein_coding	S1095	1.24179	0.00549396
Tb927.10.13790	>Tb927.10.13790 | organism=Trypanosoma_brucei_TREU927 | product=hypothetical protein, conserved | location=Tb927_10_v5.1:3366096-3368138(-) | length=680 | sequence_SO=chromosome | SO=protein_coding	T396	1.2517	0.0103288
Tb927.3.2060	>Tb927.3.2060 | organism=Trypanosoma_brucei_TREU927 | product=protein kinase, putative | location=Tb927_03_v5.1:540065-541372(-) | length=435 | sequence_SO=chromosome | SO=protein_coding	S318	1.2651	0.0469592
Tb927.5.1910	>Tb927.5.1910 | organism=Trypanosoma_brucei_TREU927 | product=hypothetical protein, conserved | location=Tb927_05_v5.1:649050-652553(+) | length=1167 | sequence_SO=chromosome | SO=protein_coding	S140	1.27498	0.0172745
Tb927.6.4440	>Tb927.6.4440 | organism=Trypanosoma_brucei_TREU927 | product=hypothetical protein, conserved | location=Tb927_06_v5.1:1246165-1247223(-) | length=352 | sequence_SO=chromosome | SO=protein_coding	S224	1.31718	0.0149934
Tb927.11.9400	>Tb927.11.9400 | organism=Trypanosoma_brucei_TREU927 | product=hypothetical protein, conserved | location=Tb927_11_v5.1:2577671-2580334(-) | length=887 | sequence_SO=chromosome | SO=protein_coding	S734	1.32877	0.00322837
Tb927.10.14890	>Tb927.10.14890 | organism=Trypanosoma_brucei_TREU927 | product=C-terminal motor kinesin, putative (TBKIFC1) | location=Tb927_10_v5.1:3633146-3635608(+) | length=820 | sequence_SO=chromosome | SO=protein_coding;>Tb11.v5.0636 | organism=Trypanosoma_brucei_T	S162	1.33168	0.0422151
Tb927.11.14210	>Tb927.11.14210 | organism=Trypanosoma_brucei_TREU927 | product=hypothetical protein, conserved | location=Tb927_11_v5.1:3766797-3771167(+) | length=1456 | sequence_SO=chromosome | SO=protein_coding	S1145	1.33319	0.00603948
Tb927.3.5020	>Tb927.3.5020 | organism=Trypanosoma_brucei_TREU927 | product=hypothetical protein, conserved | location=Tb927_03_v5.1:1408124-1412365(+) | length=1413 | sequence_SO=chromosome | SO=protein_coding	S328	1.34107	0.00549396
Tb927.8.4160	>Tb927.8.4160 | organism=Trypanosoma_brucei_TREU927 | product=hypothetical protein, conserved | location=Tb927_08_v5.1:1223367-1227104(-) | length=1245 | sequence_SO=chromosome | SO=protein_coding	S1063	1.37076	0.00938347
Tb927.11.2140	>Tb927.11.2140 | organism=Trypanosoma_brucei_TREU927 | product=hypothetical protein, conserved | location=Tb927_11_v5.1:607583-610924(+) | length=1113 | sequence_SO=chromosome | SO=protein_coding	S665	1.38378	0.00715403
Tb927.8.1480	>Tb927.8.1480 | organism=Trypanosoma_brucei_TREU927 | product=hypothetical protein, conserved | location=Tb927_08_v5.1:478123-485529(+) | length=2468 | sequence_SO=chromosome | SO=protein_coding	S2094	1.38754	0.00549396
Tb927.11.7820	>Tb927.11.7820 | organism=Trypanosoma_brucei_TREU927 | product=endonuclease/exonuclease/phosphatase, putative | location=Tb927_11_v5.1:2215857-2217500(-) | length=547 | sequence_SO=chromosome | SO=protein_coding	S25	1.47392	0.0272758
Tb927.9.12360	>Tb927.9.12360 | organism=Trypanosoma_brucei_TREU927 | product=RNA-binding protein, putative (RBP35) | location=Tb927_09_v5.1:1930262-1931944(+) | length=560 | sequence_SO=chromosome | SO=protein_coding	S372	1.53326	0.0152003
Tb927.5.1410	>Tb927.5.1410 | organism=Trypanosoma_brucei_TREU927 | product=64 kDa invariant surface glycoprotein (ISG64) | location=Tb927_05_v5.1:508589-509896(-) | length=435 | sequence_SO=chromosome | SO=protein_coding;>Tb927.5.1390 | organism=Trypanosoma_brucei_TREU	S420	1.57865	0.0210363
Tb927.10.13520	>Tb927.10.13520 | organism=Trypanosoma_brucei_TREU927 | product=hypothetical protein, conserved,hypothetical protein | location=Tb927_10_v5.1:3298808-3300415(-) | length=535 | sequence_SO=chromosome | SO=protein_coding	S423	1.6327	0.0150056
Tb927.11.14210	>Tb927.11.14210 | organism=Trypanosoma_brucei_TREU927 | product=hypothetical protein, conserved | location=Tb927_11_v5.1:3766797-3771167(+) | length=1456 | sequence_SO=chromosome | SO=protein_coding	S840	1.68608	0.00549396
Tb927.8.4360	>Tb927.8.4360 | organism=Trypanosoma_brucei_TREU927 | product=hypothetical protein, conserved | location=Tb927_08_v5.1:1296564-1301385(-) | length=1368 | sequence_SO=chromosome | SO=protein_coding	S1129	1.8009	0.0217329

## Sheet: GOenrichDownKO
ID	Name	Bgd count	Result count	Result gene list	Pct of bgd	Fold enrichment	Odds ratio	P-value	Benjamini	Bonferroni
GO:0010468	regulation of gene expression	434	26	Tb927.1.3070,Tb927.1.4280,Tb927.1.5000,Tb927.10.14770,Tb927.10.5450,Tb927.11.11770,Tb927.11.12640,Tb927.11.15100,Tb927.11.16470,Tb927.11.1660,Tb927.11.16610,Tb927.11.1820,Tb927.11.9400,Tb927.2.2190,Tb927.2.3580,Tb927.2.5200,Tb927.3.1920,Tb927.3.5250,Tb927.4.4230,Tb927.6.640,Tb927.7.2660,Tb927.7.3550,Tb927.7.4900,Tb927.9.5260,Tb927.9.8060,Tb927.9.9450,	6.0	3.0	3.58	3.49990965024e-07	0.000105898382971	0.000143846286625
GO:0060255	regulation of macromolecule metabolic process	454	26	Tb927.1.3070,Tb927.1.4280,Tb927.1.5000,Tb927.10.14770,Tb927.10.5450,Tb927.11.11770,Tb927.11.12640,Tb927.11.15100,Tb927.11.16470,Tb927.11.1660,Tb927.11.16610,Tb927.11.1820,Tb927.11.9400,Tb927.2.2190,Tb927.2.3580,Tb927.2.5200,Tb927.3.1920,Tb927.3.5250,Tb927.4.4230,Tb927.6.640,Tb927.7.2660,Tb927.7.3550,Tb927.7.4900,Tb927.9.5260,Tb927.9.8060,Tb927.9.9450,	5.7	2.87	3.4	8.36176256936e-07	0.000105898382971	0.000343668441601
GO:0050789	regulation of biological process	713	34	Tb927.1.3070,Tb927.1.4280,Tb927.1.5000,Tb927.10.14770,Tb927.10.15020,Tb927.10.460,Tb927.10.5450,Tb927.10.5950,Tb927.10.8560,Tb927.11.11770,Tb927.11.12640,Tb927.11.15100,Tb927.11.16470,Tb927.11.1660,Tb927.11.16610,Tb927.11.1820,Tb927.11.9400,Tb927.2.2190,Tb927.2.3580,Tb927.2.5200,Tb927.3.1920,Tb927.3.5250,Tb927.4.4060,Tb927.4.420,Tb927.4.4230,Tb927.4.4430,Tb927.6.640,Tb927.7.2660,Tb927.7.3550,Tb92…	4.8	2.39	2.89	9.9100978708e-07	0.000105898382971	0.00040730502249
GO:0019222	regulation of metabolic process	459	26	Tb927.1.3070,Tb927.1.4280,Tb927.1.5000,Tb927.10.14770,Tb927.10.5450,Tb927.11.11770,Tb927.11.12640,Tb927.11.15100,Tb927.11.16470,Tb927.11.1660,Tb927.11.16610,Tb927.11.1820,Tb927.11.9400,Tb927.2.2190,Tb927.2.3580,Tb927.2.5200,Tb927.3.1920,Tb927.3.5250,Tb927.4.4230,Tb927.6.640,Tb927.7.2660,Tb927.7.3550,Tb927.7.4900,Tb927.9.5260,Tb927.9.8060,Tb927.9.9450,	5.7	2.84	3.36	1.0306411968e-06	0.000105898382971	0.000423593531886
GO:0065007	biological regulation	752	34	Tb927.1.3070,Tb927.1.4280,Tb927.1.5000,Tb927.10.14770,Tb927.10.15020,Tb927.10.460,Tb927.10.5450,Tb927.10.5950,Tb927.10.8560,Tb927.11.11770,Tb927.11.12640,Tb927.11.15100,Tb927.11.16470,Tb927.11.1660,Tb927.11.16610,Tb927.11.1820,Tb927.11.9400,Tb927.2.2190,Tb927.2.3580,Tb927.2.5200,Tb927.3.1920,Tb927.3.5250,Tb927.4.4060,Tb927.4.420,Tb927.4.4230,Tb927.4.4430,Tb927.6.640,Tb927.7.2660,Tb927.7.3550,Tb92…	4.5	2.27	2.72	3.33095450202e-06	0.000273804460066	0.00136902230033
GO:0010608	posttranscriptional regulation of gene expression	387	20	Tb927.1.3070,Tb927.1.4280,Tb927.1.5000,Tb927.10.14770,Tb927.11.11770,Tb927.11.12640,Tb927.11.15100,Tb927.11.16470,Tb927.11.16610,Tb927.11.1820,Tb927.11.9400,Tb927.2.5200,Tb927.3.1920,Tb927.3.5250,Tb927.4.4230,Tb927.7.2660,Tb927.7.3550,Tb927.9.5260,Tb927.9.8060,Tb927.9.9450,	5.2	2.59	2.94	7.77124969377e-05	0.00532330604023	0.0319398362414
GO:0006468	protein phosphorylation	202	13	Tb927.1.1530,Tb927.10.14770,Tb927.10.15020,Tb927.10.460,Tb927.10.5950,Tb927.11.10520,Tb927.11.12310,Tb927.11.15010,Tb927.11.9290,Tb927.6.2250,Tb927.7.3580,Tb927.9.10920,Tb927.9.4910,	6.4	3.23	3.61	0.000185595506616	0.0108971076027	0.076279753219
GO:0016310	phosphorylation	248	14	Tb927.1.1530,Tb927.10.14770,Tb927.10.15020,Tb927.10.460,Tb927.10.5620,Tb927.10.5950,Tb927.11.10520,Tb927.11.12310,Tb927.11.15010,Tb927.11.9290,Tb927.6.2250,Tb927.7.3580,Tb927.9.10920,Tb927.9.4910,	5.6	2.83	3.14	0.000408497993288	0.0209865844052	0.167892675241
GO:0016192	vesicle-mediated transport	121	9	Tb927.10.2270,Tb927.10.570,Tb927.11.10650,Tb927.11.12310,Tb927.11.4220,Tb927.11.670,Tb927.2.6050,Tb927.4.760,Tb927.9.1970,	7.4	3.73	4.14	0.000664071874344	0.0300003228233	0.272933540356
GO:2000112	regulation of cellular macromolecule biosynthetic process	56	6	Tb927.10.5450,Tb927.11.1660,Tb927.11.1820,Tb927.2.2190,Tb927.2.3580,Tb927.3.1920,	10.7	5.37	6.1	0.000813289579163	0.0300003228233	0.334262017036
GO:0031326	regulation of cellular biosynthetic process	57	6	Tb927.10.5450,Tb927.11.1660,Tb927.11.1820,Tb927.2.2190,Tb927.2.3580,Tb927.3.1920,	10.5	5.28	5.98	0.000894238726625	0.0300003228233	0.367532116643
GO:0010556	regulation of macromolecule biosynthetic process	57	6	Tb927.10.5450,Tb927.11.1660,Tb927.11.1820,Tb927.2.2190,Tb927.2.3580,Tb927.3.1920,	10.5	5.28	5.98	0.000894238726625	0.0300003228233	0.367532116643
GO:0009889	regulation of biosynthetic process	58	6	Tb927.10.5450,Tb927.11.1660,Tb927.11.1820,Tb927.2.2190,Tb927.2.3580,Tb927.3.1920,	10.3	5.19	5.86	0.000981259522191	0.0300003228233	0.403297663621
GO:0051641	cellular localization	157	10	Tb927.10.1170,Tb927.10.14470,Tb927.10.15520,Tb927.10.2270,Tb927.10.570,Tb927.11.10650,Tb927.2.6050,Tb927.4.1850,Tb927.4.760,Tb927.9.1970,	6.4	3.19	3.51	0.00112893703499	0.0300003228233	0.463993121382
GO:2001141	regulation of RNA biosynthetic process	41	5	Tb927.10.5450,Tb927.11.1660,Tb927.2.2190,Tb927.2.3580,Tb927.3.1920,	12.2	6.11	7.03	0.0012408892652	0.0300003228233	0.510005487996
GO:1903506	regulation of nucleic acid-templated transcription	41	5	Tb927.10.5450,Tb927.11.1660,Tb927.2.2190,Tb927.2.3580,Tb927.3.1920,	12.2	6.11	7.03	0.0012408892652	0.0300003228233	0.510005487996
GO:0006355	regulation of transcription, DNA-templated	41	5	Tb927.10.5450,Tb927.11.1660,Tb927.2.2190,Tb927.2.3580,Tb927.3.1920,	12.2	6.11	7.03	0.0012408892652	0.0300003228233	0.510005487996
GO:0042886	amide transport	114	8	Tb927.10.15520,Tb927.10.2270,Tb927.10.570,Tb927.11.10650,Tb927.11.710,Tb927.2.6050,Tb927.4.1850,Tb927.4.760,	7.0	3.52	3.86	0.00192167464142	0.0394904138812	0.789808277623
GO:0015833	peptide transport	114	8	Tb927.10.15520,Tb927.10.2270,Tb927.10.570,Tb927.11.10650,Tb927.11.710,Tb927.2.6050,Tb927.4.1850,Tb927.4.760,	7.0	3.52	3.86	0.00192167464142	0.0394904138812	0.789808277623
GO:0015031	protein transport	114	8	Tb927.10.15520,Tb927.10.2270,Tb927.10.570,Tb927.11.10650,Tb927.11.710,Tb927.2.6050,Tb927.4.1850,Tb927.4.760,	7.0	3.52	3.86	0.00192167464142	0.0394904138812	0.789808277623
GO:0045184	establishment of protein localization	115	8	Tb927.10.15520,Tb927.10.2270,Tb927.10.570,Tb927.11.10650,Tb927.11.710,Tb927.2.6050,Tb927.4.1850,Tb927.4.760,	7.0	3.49	3.82	0.00203115112646	0.0397525291893	0.834803112976
GO:0031935	regulation of chromatin silencing	4	2	Tb927.10.5450,Tb927.2.2190,	50.0	25.06	49.78	0.00231028894899	0.0431603980925	0.949528758034
GO:0008104	protein localization	119	8	Tb927.10.15520,Tb927.10.2270,Tb927.10.570,Tb927.11.10650,Tb927.11.710,Tb927.2.6050,Tb927.4.1850,Tb927.4.760,	6.7	3.37	3.68	0.00251916138795	0.0450163187152	1.0
GO:0006464	cellular protein modification process	442	18	Tb927.1.1530,Tb927.10.14770,Tb927.10.15020,Tb927.10.460,Tb927.10.5950,Tb927.11.10520,Tb927.11.12310,Tb927.11.12480,Tb927.11.15010,Tb927.11.4220,Tb927.11.9290,Tb927.2.4280,Tb927.3.4840,Tb927.6.2250,Tb927.6.640,Tb927.7.3580,Tb927.9.10920,Tb927.9.4910,	4.1	2.04	2.23	0.00292555049152	0.0480960500806	1.0
GO:0036211	protein modification process	442	18	Tb927.1.1530,Tb927.10.14770,Tb927.10.15020,Tb927.10.460,Tb927.10.5950,Tb927.11.10520,Tb927.11.12310,Tb927.11.12480,Tb927.11.15010,Tb927.11.4220,Tb927.11.9290,Tb927.2.4280,Tb927.3.4840,Tb927.6.2250,Tb927.6.640,Tb927.7.3580,Tb927.9.10920,Tb927.9.4910,	4.1	2.04	2.23	0.00292555049152	0.0480960500806	1.0
GO:0033036	macromolecule localization	127	8	Tb927.10.15520,Tb927.10.2270,Tb927.10.570,Tb927.11.10650,Tb927.11.710,Tb927.2.6050,Tb927.4.1850,Tb927.4.760,	6.3	3.16	3.43	0.00376792296741	0.0578460345174	1.0
GO:1902275	regulation of chromatin organization	5	2	Tb927.10.5450,Tb927.2.2190,	40.0	20.05	33.18	0.00380010445735	0.0578460345174	1.0
GO:1903508	positive regulation of nucleic acid-templated transcription	6	2	Tb927.10.5450,Tb927.2.2190,	33.3	16.71	24.88	0.00562569731561	0.0660617599062	1.0
GO:0033044	regulation of chromosome organization	6	2	Tb927.10.5450,Tb927.2.2190,	33.3	16.71	24.88	0.00562569731561	0.0660617599062	1.0
GO:0045893	positive regulation of transcription, DNA-templated	6	2	Tb927.10.5450,Tb927.2.2190,	33.3	16.71	24.88	0.00562569731561	0.0660617599062	1.0
GO:0045935	positive regulation of nucleobase-containing compound metabolic process	6	2	Tb927.10.5450,Tb927.2.2190,	33.3	16.71	24.88	0.00562569731561	0.0660617599062	1.0
GO:0006904	vesicle docking involved in exocytosis	6	2	Tb927.10.570,Tb927.9.1970,	33.3	16.71	24.88	0.00562569731561	0.0660617599062	1.0
GO:0140029	exocytic process	6	2	Tb927.10.570,Tb927.9.1970,	33.3	16.71	24.88	0.00562569731561	0.0660617599062	1.0
GO:0051254	positive regulation of RNA metabolic process	6	2	Tb927.10.5450,Tb927.2.2190,	33.3	16.71	24.88	0.00562569731561	0.0660617599062	1.0
GO:1902680	positive regulation of RNA biosynthetic process	6	2	Tb927.10.5450,Tb927.2.2190,	33.3	16.71	24.88	0.00562569731561	0.0660617599062	1.0
GO:0010629	negative regulation of gene expression	20	3	Tb927.10.5450,Tb927.6.640,Tb927.7.4900,	15.0	7.52	8.83	0.00691461115926	0.0789418107349	1.0
GO:0046907	intracellular transport	142	8	Tb927.10.1170,Tb927.10.14470,Tb927.10.15520,Tb927.10.2270,Tb927.11.10650,Tb927.2.6050,Tb927.4.1850,Tb927.4.760,	5.6	2.82	3.04	0.00734750576247	0.0798702251699	1.0
GO:0022406	membrane docking	7	2	Tb927.10.570,Tb927.9.1970,	28.6	14.32	19.9	0.00777325792407	0.0798702251699	1.0
GO:0048278	vesicle docking	7	2	Tb927.10.570,Tb927.9.1970,	28.6	14.32	19.9	0.00777325792407	0.0798702251699	1.0
GO:0140056	organelle localization by membrane tethering	7	2	Tb927.10.570,Tb927.9.1970,	28.6	14.32	19.9	0.00777325792407	0.0798702251699	1.0
GO:0051649	establishment of localization in cell	147	8	Tb927.10.1170,Tb927.10.14470,Tb927.10.15520,Tb927.10.2270,Tb927.11.10650,Tb927.2.6050,Tb927.4.1850,Tb927.4.760,	5.4	2.73	2.93	0.00898153367365	0.0900343985334	1.0
GO:0043412	macromolecule modification	534	19	Tb927.1.1530,Tb927.10.14770,Tb927.10.15020,Tb927.10.170,Tb927.10.460,Tb927.10.5950,Tb927.11.10520,Tb927.11.12310,Tb927.11.12480,Tb927.11.15010,Tb927.11.4220,Tb927.11.9290,Tb927.2.4280,Tb927.3.4840,Tb927.6.2250,Tb927.6.640,Tb927.7.3580,Tb927.9.10920,Tb927.9.4910,	3.6	1.78	1.93	0.00955828480495	0.0913973550471	1.0
GO:0031328	positive regulation of cellular biosynthetic process	8	2	Tb927.10.5450,Tb927.2.2190,	25.0	12.53	16.59	0.0102293876695	0.0913973550471	1.0
GO:0060968	regulation of gene silencing	8	2	Tb927.10.5450,Tb927.2.2190,	25.0	12.53	16.59	0.0102293876695	0.0913973550471	1.0
GO:0010557	positive regulation of macromolecule biosynthetic process	8	2	Tb927.10.5450,Tb927.2.2190,	25.0	12.53	16.59	0.0102293876695	0.0913973550471	1.0
GO:0009891	positive regulation of biosynthetic process	8	2	Tb927.10.5450,Tb927.2.2190,	25.0	12.53	16.59	0.0102293876695	0.0913973550471	1.0
GO:0051252	regulation of RNA metabolic process	69	5	Tb927.10.5450,Tb927.11.1660,Tb927.2.2190,Tb927.2.3580,Tb927.3.1920,	7.2	3.63	3.94	0.011927863321	0.10260052405	1.0
GO:0006402	mRNA catabolic process	9	2	Tb927.6.640,Tb927.7.4900,	22.2	11.14	14.21	0.0129810882009	0.10260052405	1.0
GO:0006613	cotranslational protein targeting to membrane	9	2	Tb927.10.15520,Tb927.4.1850,	22.2	11.14	14.21	0.0129810882009	0.10260052405	1.0
GO:0006614	SRP-dependent cotranslational protein targeting to membrane	9	2	Tb927.10.15520,Tb927.4.1850,	22.2	11.14	14.21	0.0129810882009	0.10260052405	1.0
GO:0051173	positive regulation of nitrogen compound metabolic process	9	2	Tb927.10.5450,Tb927.2.2190,	22.2	11.14	14.21	0.0129810882009	0.10260052405	1.0
GO:0031325	positive regulation of cellular metabolic process	9	2	Tb927.10.5450,Tb927.2.2190,	22.2	11.14	14.21	0.0129810882009	0.10260052405	1.0
GO:0019219	regulation of nucleobase-containing compound metabolic process	71	5	Tb927.10.5450,Tb927.11.1660,Tb927.2.2190,Tb927.2.3580,Tb927.3.1920,	7.0	3.53	3.82	0.0133894112506	0.103831094792	1.0
GO:0006612	protein targeting to membrane	10	2	Tb927.10.15520,Tb927.4.1850,	20.0	10.03	12.44	0.0160157509673	0.112316295482	1.0
GO:0045047	protein targeting to ER	10	2	Tb927.10.15520,Tb927.4.1850,	20.0	10.03	12.44	0.0160157509673	0.112316295482	1.0
GO:0072599	establishment of protein localization to endoplasmic reticulum	10	2	Tb927.10.15520,Tb927.4.1850,	20.0	10.03	12.44	0.0160157509673	0.112316295482	1.0
GO:0031323	regulation of cellular metabolic process	103	6	Tb927.10.5450,Tb927.11.1660,Tb927.11.1820,Tb927.2.2190,Tb927.2.3580,Tb927.3.1920,	5.8	2.92	3.12	0.0167136741281	0.112316295482	1.0
GO:0051171	regulation of nitrogen compound metabolic process	104	6	Tb927.10.5450,Tb927.11.1660,Tb927.11.1820,Tb927.2.2190,Tb927.2.3580,Tb927.3.1920,	5.8	2.89	3.09	0.0174540910762	0.112316295482	1.0
GO:0007018	microtubule-based movement	104	6	Tb927.10.1170,Tb927.10.14470,Tb927.11.3280,Tb927.11.6400,Tb927.2.4060,Tb927.3.4960,	5.8	2.89	3.09	0.0174540910762	0.112316295482	1.0
GO:0006796	phosphate-containing compound metabolic process	529	18	Tb927.1.1530,Tb927.10.14770,Tb927.10.15020,Tb927.10.460,Tb927.10.5620,Tb927.10.5950,Tb927.11.10520,Tb927.11.12310,Tb927.11.12480,Tb927.11.15010,Tb927.11.9290,Tb927.2.4280,Tb927.4.4430,Tb927.6.2250,Tb927.6.640,Tb927.7.3580,Tb927.9.10920,Tb927.9.4910,	3.4	1.71	1.83	0.0176557921057	0.112316295482	1.0
GO:0080090	regulation of primary metabolic process	105	6	Tb927.10.5450,Tb927.11.1660,Tb927.11.1820,Tb927.2.2190,Tb927.2.3580,Tb927.3.1920,	5.7	2.86	3.06	0.0182168007039	0.112316295482	1.0
GO:0072657	protein localization to membrane	11	2	Tb927.10.15520,Tb927.4.1850,	18.2	9.11	11.05	0.0193211470054	0.112316295482	1.0
GO:0090150	establishment of protein localization to membrane	11	2	Tb927.10.15520,Tb927.4.1850,	18.2	9.11	11.05	0.0193211470054	0.112316295482	1.0
GO:0006887	exocytosis	11	2	Tb927.10.570,Tb927.9.1970,	18.2	9.11	11.05	0.0193211470054	0.112316295482	1.0
GO:1903939	regulation of TORC2 signaling	1	1	Tb927.4.420,	100.0	50.13	inf	0.0199491230419	0.112316295482	1.0
GO:0034620	cellular response to unfolded protein	1	1	Tb927.9.5260,	100.0	50.13	inf	0.0199491230419	0.112316295482	1.0
GO:0030433	ubiquitin-dependent ERAD pathway	1	1	Tb927.9.5260,	100.0	50.13	inf	0.0199491230419	0.112316295482	1.0
GO:0000290	deadenylation-dependent decapping of nuclear-transcribed mRNA	1	1	Tb927.6.640,	100.0	50.13	inf	0.0199491230419	0.112316295482	1.0
GO:0035967	cellular response to topologically incorrect protein	1	1	Tb927.9.5260,	100.0	50.13	inf	0.0199491230419	0.112316295482	1.0
GO:0030952	establishment or maintenance of cytoskeleton polarity	1	1	Tb927.4.420,	100.0	50.13	inf	0.0199491230419	0.112316295482	1.0
GO:0030950	establishment or maintenance of actin cytoskeleton polarity	1	1	Tb927.4.420,	100.0	50.13	inf	0.0199491230419	0.112316295482	1.0
GO:0031555	transcriptional attenuation	1	1	Tb927.10.5450,	100.0	50.13	inf	0.0199491230419	0.112316295482	1.0
GO:0031554	regulation of DNA-templated transcription, termination	1	1	Tb927.10.5450,	100.0	50.13	inf	0.0199491230419	0.112316295482	1.0
GO:0006793	phosphorus metabolic process	538	18	Tb927.1.1530,Tb927.10.14770,Tb927.10.15020,Tb927.10.460,Tb927.10.5620,Tb927.10.5950,Tb927.11.10520,Tb927.11.12310,Tb927.11.12480,Tb927.11.15010,Tb927.11.9290,Tb927.2.4280,Tb927.4.4430,Tb927.6.2250,Tb927.6.640,Tb927.7.3580,Tb927.9.10920,Tb927.9.4910,	3.3	1.68	1.8	0.0205957310791	0.114389803696	1.0
GO:0098657	import into cell	30	3	Tb927.11.12310,Tb927.11.4220,Tb927.11.670,	10.0	5.01	5.55	0.0213062588376	0.11522200503	1.0
GO:0006897	endocytosis	30	3	Tb927.11.12310,Tb927.11.4220,Tb927.11.670,	10.0	5.01	5.55	0.0213062588376	0.11522200503	1.0
GO:0070972	protein localization to endoplasmic reticulum	12	2	Tb927.10.15520,Tb927.4.1850,	16.7	8.35	9.95	0.0228854169813	0.122154628303	1.0
GO:0071702	organic substance transport	209	9	Tb927.10.15520,Tb927.10.2270,Tb927.10.570,Tb927.11.10650,Tb927.11.710,Tb927.2.6050,Tb927.4.1850,Tb927.4.760,Tb927.7.5940,	4.3	2.16	2.29	0.023685558392	0.124009309289	1.0
GO:0006810	transport	468	16	Tb927.10.1170,Tb927.10.13580,Tb927.10.14470,Tb927.10.15520,Tb927.10.2270,Tb927.10.570,Tb927.11.10650,Tb927.11.12310,Tb927.11.4220,Tb927.11.670,Tb927.11.710,Tb927.2.6050,Tb927.4.1850,Tb927.4.760,Tb927.7.5940,Tb927.9.1970,	3.4	1.71	1.83	0.0238363392551	0.124009309289	1.0
GO:0051234	establishment of localization	470	16	Tb927.10.1170,Tb927.10.13580,Tb927.10.14470,Tb927.10.15520,Tb927.10.2270,Tb927.10.570,Tb927.11.10650,Tb927.11.12310,Tb927.11.4220,Tb927.11.670,Tb927.11.710,Tb927.2.6050,Tb927.4.1850,Tb927.4.760,Tb927.7.5940,Tb927.9.1970,	3.4	1.71	1.82	0.0246881514813	0.126835378235	1.0
GO:0048519	negative regulation of biological process	56	4	Tb927.10.5450,Tb927.2.2190,Tb927.6.640,Tb927.7.4900,	7.1	3.58	3.86	0.025067578356	0.127194749436	1.0
GO:0035735	intraciliary transport involved in cilium assembly	14	2	Tb927.10.1170,Tb927.10.14470,	14.3	7.16	8.29	0.0307449314624	0.150430557512	1.0
GO:0006401	RNA catabolic process	14	2	Tb927.6.640,Tb927.7.4900,	14.3	7.16	8.29	0.0307449314624	0.150430557512	1.0
GO:0032940	secretion by cell	14	2	Tb927.10.570,Tb927.9.1970,	14.3	7.16	8.29	0.0307449314624	0.150430557512	1.0
GO:0046903	secretion	15	2	Tb927.10.570,Tb927.9.1970,	13.3	6.68	7.65	0.0350182191365	0.169323389001	1.0
GO:0071705	nitrogen compound transport	190	8	Tb927.10.15520,Tb927.10.2270,Tb927.10.570,Tb927.11.10650,Tb927.11.710,Tb927.2.6050,Tb927.4.1850,Tb927.4.760,	4.2	2.11	2.23	0.0359728584705	0.170917373259	1.0
GO:0006886	intracellular protein transport	94	5	Tb927.10.15520,Tb927.11.10650,Tb927.2.6050,Tb927.4.1850,Tb927.4.760,	5.3	2.67	2.82	0.0393650901852	0.170917373259	1.0
GO:0050793	regulation of developmental process	38	3	Tb927.10.15020,Tb927.10.5950,Tb927.7.5940,	7.9	3.96	4.28	0.0394701869583	0.170917373259	1.0
GO:0010243	response to organonitrogen compound	2	1	Tb927.9.5260,	50.0	25.06	49.45	0.0395028965645	0.170917373259	1.0
GO:0071310	cellular response to organic substance	2	1	Tb927.9.5260,	50.0	25.06	49.45	0.0395028965645	0.170917373259	1.0
GO:0034976	response to endoplasmic reticulum stress	2	1	Tb927.9.5260,	50.0	25.06	49.45	0.0395028965645	0.170917373259	1.0
GO:0036503	ERAD pathway	2	1	Tb927.9.5260,	50.0	25.06	49.45	0.0395028965645	0.170917373259	1.0
GO:0071470	cellular response to osmotic stress	2	1	Tb927.11.10650,	50.0	25.06	49.45	0.0395028965645	0.170917373259	1.0
GO:0000288	nuclear-transcribed mRNA catabolic process, deadenylation-dependent decay	2	1	Tb927.6.640,	50.0	25.06	49.45	0.0395028965645	0.170917373259	1.0
GO:0009628	response to abiotic stimulus	16	2	Tb927.11.10650,Tb927.7.5940,	12.5	6.27	7.1	0.0395064488069	0.170917373259	1.0
GO:0051640	organelle localization	17	2	Tb927.10.570,Tb927.9.1970,	11.8	5.9	6.63	0.0441994681331	0.187278158791	1.0
GO:0042073	intraciliary transport	17	2	Tb927.10.1170,Tb927.10.14470,	11.8	5.9	6.63	0.0441994681331	0.187278158791	1.0
GO:0070727	cellular macromolecule localization	99	5	Tb927.10.15520,Tb927.11.10650,Tb927.2.6050,Tb927.4.1850,Tb927.4.760,	5.1	2.53	2.67	0.0474550093078	0.19445969037	1.0
GO:0034613	cellular protein localization	99	5	Tb927.10.15520,Tb927.11.10650,Tb927.2.6050,Tb927.4.1850,Tb927.4.760,	5.1	2.53	2.67	0.0474550093078	0.19445969037	1.0
GO:0006470	protein dephosphorylation	41	3	Tb927.11.12480,Tb927.2.4280,Tb927.6.640,	7.3	3.67	3.94	0.0477863806072	0.19445969037	1.0
GO:0048522	positive regulation of cellular process	18	2	Tb927.10.5450,Tb927.2.2190,	11.1	5.57	6.21	0.0490874395245	0.19445969037	1.0

## Sheet: GOenrichUpKO
ID	Name	Bgd count	Result count	Result gene list	Pct of bgd	Fold enrichment	Odds ratio	P-value	Benjamini	Bonferroni
GO:0010608	posttranscriptional regulation of gene expression	387	21	Tb927.10.12330,Tb927.10.13610,Tb927.10.720,Tb927.10.9330,Tb927.11.11860,Tb927.11.14220,Tb927.11.9400,Tb927.2.4930,Tb927.2.5150,Tb927.3.5250,Tb927.3.5310,Tb927.5.1600,Tb927.6.4440,Tb927.7.3550,Tb927.7.3740,Tb927.7.6640,Tb927.8.2780,Tb927.8.4540,Tb927.9.12360,Tb927.9.3580,Tb927.9.9290,	5.4	3.17	3.74	2.14466089597e-06	0.000559756493849	0.000559756493849
GO:0010468	regulation of gene expression	434	21	Tb927.10.12330,Tb927.10.13610,Tb927.10.720,Tb927.10.9330,Tb927.11.11860,Tb927.11.14220,Tb927.11.9400,Tb927.2.4930,Tb927.2.5150,Tb927.3.5250,Tb927.3.5310,Tb927.5.1600,Tb927.6.4440,Tb927.7.3550,Tb927.7.3740,Tb927.7.6640,Tb927.8.2780,Tb927.8.4540,Tb927.9.12360,Tb927.9.3580,Tb927.9.9290,	4.8	2.82	3.29	1.29139870161e-05	0.0016852753056	0.0033705506112
GO:0060255	regulation of macromolecule metabolic process	454	21	Tb927.10.12330,Tb927.10.13610,Tb927.10.720,Tb927.10.9330,Tb927.11.11860,Tb927.11.14220,Tb927.11.9400,Tb927.2.4930,Tb927.2.5150,Tb927.3.5250,Tb927.3.5310,Tb927.5.1600,Tb927.6.4440,Tb927.7.3550,Tb927.7.3740,Tb927.7.6640,Tb927.8.2780,Tb927.8.4540,Tb927.9.12360,Tb927.9.3580,Tb927.9.9290,	4.6	2.7	3.13	2.55209984526e-05	0.00196086376829	0.00666098059612
GO:0019222	regulation of metabolic process	459	21	Tb927.10.12330,Tb927.10.13610,Tb927.10.720,Tb927.10.9330,Tb927.11.11860,Tb927.11.14220,Tb927.11.9400,Tb927.2.4930,Tb927.2.5150,Tb927.3.5250,Tb927.3.5310,Tb927.5.1600,Tb927.6.4440,Tb927.7.3550,Tb927.7.3740,Tb927.7.6640,Tb927.8.2780,Tb927.8.4540,Tb927.9.12360,Tb927.9.3580,Tb927.9.9290,	4.6	2.67	3.09	3.00515520044e-05	0.00196086376829	0.00784345507315
GO:0050789	regulation of biological process	713	23	Tb927.10.12330,Tb927.10.13610,Tb927.10.6310,Tb927.10.720,Tb927.10.9330,Tb927.11.11860,Tb927.11.14220,Tb927.11.9400,Tb927.2.4930,Tb927.2.5150,Tb927.3.5250,Tb927.3.5310,Tb927.5.1600,Tb927.6.4440,Tb927.7.3550,Tb927.7.3740,Tb927.7.6640,Tb927.8.2780,Tb927.8.4540,Tb927.8.5450,Tb927.9.12360,Tb927.9.3580,Tb927.9.9290,	3.2	1.88	2.11	0.00207661546405	0.108399327223	0.541996636116
GO:0065007	biological regulation	752	23	Tb927.10.12330,Tb927.10.13610,Tb927.10.6310,Tb927.10.720,Tb927.10.9330,Tb927.11.11860,Tb927.11.14220,Tb927.11.9400,Tb927.2.4930,Tb927.2.5150,Tb927.3.5250,Tb927.3.5310,Tb927.5.1600,Tb927.6.4440,Tb927.7.3550,Tb927.7.3740,Tb927.7.6640,Tb927.8.2780,Tb927.8.4540,Tb927.8.5450,Tb927.9.12360,Tb927.9.3580,Tb927.9.9290,	3.1	1.78	1.99	0.00409103911797	0.159745997743	1.0
GO:0002036	regulation of L-glutamate import across plasma membrane	1	1	Tb927.8.5450,	100.0	58.35	inf	0.0171375016736	0.159745997743	1.0
GO:0044070	regulation of anion transport	1	1	Tb927.8.5450,	100.0	58.35	inf	0.0171375016736	0.159745997743	1.0
GO:0046040	IMP metabolic process	1	1	Tb927.9.7550,	100.0	58.35	inf	0.0171375016736	0.159745997743	1.0
GO:0051580	regulation of neurotransmitter uptake	1	1	Tb927.8.5450,	100.0	58.35	inf	0.0171375016736	0.159745997743	1.0
GO:0051955	regulation of amino acid transport	1	1	Tb927.8.5450,	100.0	58.35	inf	0.0171375016736	0.159745997743	1.0
GO:0051952	regulation of amine transport	1	1	Tb927.8.5450,	100.0	58.35	inf	0.0171375016736	0.159745997743	1.0
GO:0043269	regulation of ion transport	1	1	Tb927.8.5450,	100.0	58.35	inf	0.0171375016736	0.159745997743	1.0
GO:0070881	regulation of proline transport	1	1	Tb927.8.5450,	100.0	58.35	inf	0.0171375016736	0.159745997743	1.0
GO:0080144	amino acid homeostasis	1	1	Tb927.8.5450,	100.0	58.35	inf	0.0171375016736	0.159745997743	1.0
GO:1903789	regulation of amino acid transmembrane transport	1	1	Tb927.8.5450,	100.0	58.35	inf	0.0171375016736	0.159745997743	1.0
GO:0051588	regulation of neurotransmitter transport	1	1	Tb927.8.5450,	100.0	58.35	inf	0.0171375016736	0.159745997743	1.0
GO:0035524	proline transmembrane transport	1	1	Tb927.8.5450,	100.0	58.35	inf	0.0171375016736	0.159745997743	1.0
GO:0034765	regulation of ion transmembrane transport	1	1	Tb927.8.5450,	100.0	58.35	inf	0.0171375016736	0.159745997743	1.0
GO:0034762	regulation of transmembrane transport	1	1	Tb927.8.5450,	100.0	58.35	inf	0.0171375016736	0.159745997743	1.0
GO:0003333	amino acid transmembrane transport	1	1	Tb927.8.5450,	100.0	58.35	inf	0.0171375016736	0.159745997743	1.0
GO:0006188	IMP biosynthetic process	1	1	Tb927.9.7550,	100.0	58.35	inf	0.0171375016736	0.159745997743	1.0
GO:0010958	regulation of amino acid import across plasma membrane	1	1	Tb927.8.5450,	100.0	58.35	inf	0.0171375016736	0.159745997743	1.0
GO:1903959	regulation of anion transmembrane transport	1	1	Tb927.8.5450,	100.0	58.35	inf	0.0171375016736	0.159745997743	1.0
GO:0023057	negative regulation of signaling	1	1	Tb927.10.6310,	100.0	58.35	inf	0.0171375016736	0.159745997743	1.0
GO:2001023	regulation of response to drug	1	1	Tb927.8.5450,	100.0	58.35	inf	0.0171375016736	0.159745997743	1.0
GO:0034063	stress granule assembly	1	1	Tb927.8.4540,	100.0	58.35	inf	0.0171375016736	0.159745997743	1.0
GO:0032890	regulation of organic acid transport	1	1	Tb927.8.5450,	100.0	58.35	inf	0.0171375016736	0.159745997743	1.0
GO:0006417	regulation of translation	14	2	Tb927.8.4540,Tb927.9.9290,	14.3	8.34	9.69	0.0231773768921	0.201643178961	1.0
GO:0034248	regulation of cellular amide metabolic process	14	2	Tb927.8.4540,Tb927.9.9290,	14.3	8.34	9.69	0.0231773768921	0.201643178961	1.0
GO:0007018	microtubule-based movement	104	5	Tb927.10.14890,Tb927.10.15390,Tb927.11.11220,Tb927.6.4390,Tb927.7.6290,	4.8	2.81	2.97	0.0327127136757	0.239721903389	1.0
GO:0015824	proline transport	2	1	Tb927.8.5450,	50.0	29.18	57.8	0.0339835648483	0.239721903389	1.0
GO:0045727	positive regulation of translation	2	1	Tb927.8.4540,	50.0	29.18	57.8	0.0339835648483	0.239721903389	1.0
GO:0055081	anion homeostasis	2	1	Tb927.8.5450,	50.0	29.18	57.8	0.0339835648483	0.239721903389	1.0
GO:0006971	hypotonic response	2	1	Tb927.8.5450,	50.0	29.18	57.8	0.0339835648483	0.239721903389	1.0
GO:0034250	positive regulation of cellular amide metabolic process	2	1	Tb927.8.4540,	50.0	29.18	57.8	0.0339835648483	0.239721903389	1.0
GO:0015804	neutral amino acid transport	2	1	Tb927.8.5450,	50.0	29.18	57.8	0.0339835648483	0.239721903389	1.0
