# Supplementary material for: An atypical DYRK kinase connects quorum-sensing with posttranscriptional gene regulation in Trypanosoma brucei
Source: eLife. 2020 Mar 26;9:e51620. doi: 10.7554/eLife.51620 (PMC7136023; doi:10.7554/eLife.51620)
Supplement: Supplementary file 3. — Sheet 1 NMvsH866A_|FC| > 1.5_p<0.05 presents the peptides with an absolute value of FC > 1.5 and a p-value<0.05. Sheet 2 GOenrichUpNM indicate the GO term enrichment of biological functions of proteins presenting a phosphorylation in presence of the NM. Yellow colour indicates the proteins for which further analysis have been performed. [file elife-51620-supp3.xlsx]

## Sheet: NMvsH866A_|FC|>1.5_p<0.05
accession	description	pResidue	log2FC	stat
Tb927.11.12600	Tb927.11.12600 ATP-dependent DNA helicase, putative 24673157:24675688 forward MW:93815	T681	0.588313	0.0379953
Tb927.1.2340	Tb927.1.2340 alpha tubulin 572442:573797 forward MW:49787	S94	0.596752	0.0354525
Tb927.9.12360	RBP35 RNA-binding protein, putative 15540180:15541862 forward MW:61659	S373	0.617182	0.0195518
Tb927.7.4020	Tb927.7.4020 protein phosphatase 2C, putative 9985884:9988124 forward MW:78080	S302	0.618637	0.0326462
Tb927.7.4020	Tb927.7.4020 protein phosphatase 2C, putative 9985884:9988124 forward MW:78080	S296	0.618637	0.0326462
Tb927.11.16470	Tb927.11.16470 hypothetical protein, conserved 25662579:25664930 reverse MW:85059	S183	0.635045	0.0282651
Tb927.9.15460	Tb927.9.15460 calcium motive p-type ATPase, putative 16014066:16017191 forward MW:113976	S1024	0.636955	0.0102683
Tb927.11.370	RAP1 repressor activator protein 1 21382323:21384890 reverse MW:92870	S742	0.643081	0.00586574
Tb927.11.370	RAP1 repressor activator protein 1 21382323:21384890 reverse MW:92870	S744	0.643081	0.00586574
Tb927.3.1920	NOT5 NOT5 protein 2764334:2766148 reverse MW:66856	S395	0.662938	0.0362996
Tb927.11.15140	Tb927.11.15140 hypothetical protein, conserved 25323041:25324747 reverse MW:62090	S530	0.664088	0.0169981
Tb927.8.1590	upl3 ubiquitin-protein ligase, putative 11645545:11658459 forward MW:470719	S2369	0.664953	0.016191
Tb927.10.12820	Tb927.10.12820 hypothetical protein, conserved 20267025:20270066 reverse MW:110245	S112	0.670075	0.036469
Tb927.8.3810	Tb927.8.3810 hypothetical protein, conserved 12261443:12262615 reverse MW:43581	S331	0.714759	0.0159317
Tb927.8.880	Tb927.8.880 hypothetical protein 11389885:11392134 reverse MW:79364	T368	0.732623	0.0125134
Tb927.8.880	Tb927.8.880 hypothetical protein 11389885:11392134 reverse MW:79364	S366	0.732623	0.0125134
Tb927.8.880	Tb927.8.880 hypothetical protein 11389885:11392134 reverse MW:79364	T364	0.732623	0.0125134
Tb927.3.1920	NOT5 NOT5 protein 2764334:2766148 reverse MW:66856	S395	0.733634	0.0221077
Tb927.7.3550	Tb927.7.3550 hypothetical protein, conserved 9840346:9844071 reverse MW:138165	S1048	0.740167	0.0480692
Tb927.7.3740	Tb927.7.3740 hypothetical protein, conserved 9902310:9904859 reverse MW:93251	S165	0.744668	0.0369456
Tb927.7.3980	Tb927.7.3980 immunodominant antigen, putative 9970495:9973209 forward MW:97321	S372	0.78115	0.0270403
Tb927.8.6990	Tb927.8.6990 hypothetical protein, conserved 13142109:13142402 forward MW:10759	S23	0.787709	0.0199059
Tb927.9.10790	Tb927.9.10790 hypothetical protein 15314782:15315699 reverse MW:33139	T180	0.833024	0.0313519
Tb927.8.2860	Tb927.8.2860 hypothetical protein, conserved 11994336:11997032 reverse MW:99327	S336	0.856294	0.0323555
Tb927.11.12150	BILBO1 flagellar protein essential for flagellar pocket biogenesis 24546354:24548117 forward MW:67326	S163	0.898273	0.0217273
Tb927.3.3300	Tb927.3.3300 hypothetical protein, conserved 3106659:3109103 reverse MW:89199	S330	0.915984	0.0236731
Tb927.7.3980	Tb927.7.3980 immunodominant antigen, putative 9970495:9973209 forward MW:97321	S372	0.953514	0.0202933
Tb927.8.3590	Tb927.8.3590 hypothetical protein, conserved 12207707:12209665 reverse MW:72241	S640	0.992039	0.033332
Tb927.6.1870	Tb927.6.1870 eukaryotic translation initiation factor 4e, putative 7926335:7927618 reverse MW:46542	S90	1.02155	0.0179728
Tb927.10.11950	Tb927.10.11950 hypothetical protein, conserved 20064949:20065557 forward MW:22385	S117	1.028	0.0404367
Tb927.11.3500	Tb927.11.3500 hypothetical protein, conserved 22332518:22335571 forward MW:115189	S84	1.03899	0.00762512
Tb927.7.2650	Tb927.7.2650 hypothetical protein, conserved 9604230:9605843 reverse MW:62172	S25	1.04102	0.0366026
Tb927.7.2650	Tb927.7.2650 hypothetical protein, conserved 9604230:9605843 reverse MW:62172	S29	1.04102	0.0366026
Tb927.9.2760	3C4.380 hypothetical protein, conserved 14212853:14214463 reverse MW:56997	S412	1.07997	0.0314555
Tb927.9.2760	3C4.380 hypothetical protein, conserved 14212853:14214463 reverse MW:56997	S409	1.07997	0.0314555
Tb927.11.15140	Tb927.11.15140 hypothetical protein, conserved 25323041:25324747 reverse MW:62090	S517	1.21971	0.00697913
Tb927.10.8940	Tb927.10.8940 hypothetical protein, conserved 19372293:19373528 forward MW:45399	S81	1.26116	0.0307553
Tb927.3.3850	Tb927.3.3850 hypothetical protein, conserved 3325176:3329339 forward MW:146555	S243	2.58878	0.0165002

## Sheet: GOenrichUpNM
ID	Name	Bgd count	Result count	Result gene list	Pct of bgd	Fold enrichment	Odds ratio	P-value	Benjamini	Bonferroni
GO:0010608	posttranscriptional regulation of gene expression	387	6	Tb927.11.16470,Tb927.3.1920,Tb927.6.1870,Tb927.7.3550,Tb927.7.3740,Tb927.9.12360,	1.6	4.45	5.56	0.00176816457918	0.0678959972324	0.229861395293
GO:0050789	regulation of biological process	713	8	Tb927.11.16470,Tb927.3.1920,Tb927.3.3850,Tb927.6.1870,Tb927.7.3550,Tb927.7.3740,Tb927.8.2860,Tb927.9.12360,	1.1	3.22	4.25	0.00217730753268	0.0678959972324	0.283049979248
GO:0065007	biological regulation	752	8	Tb927.11.16470,Tb927.3.1920,Tb927.3.3850,Tb927.6.1870,Tb927.7.3550,Tb927.7.3740,Tb927.8.2860,Tb927.9.12360,	1.1	3.06	4.0	0.00305511275436	0.0678959972324	0.397164658067
GO:0010468	regulation of gene expression	434	6	Tb927.11.16470,Tb927.3.1920,Tb927.6.1870,Tb927.7.3550,Tb927.7.3740,Tb927.9.12360,	1.4	3.97	4.92	0.00316146602737	0.0678959972324	0.410990583558
GO:0070973	protein localization to endoplasmic reticulum exit site	1	1	Tb927.3.3850,	100.0	287.27	inf	0.00348105502746	0.0678959972324	0.45253715357
GO:0007029	endoplasmic reticulum organization	1	1	Tb927.3.3850,	100.0	287.27	inf	0.00348105502746	0.0678959972324	0.45253715357
GO:0060255	regulation of macromolecule metabolic process	454	6	Tb927.11.16470,Tb927.3.1920,Tb927.6.1870,Tb927.7.3550,Tb927.7.3740,Tb927.9.12360,	1.3	3.8	4.68	0.00395755470211	0.0678959972324	0.514482111275
GO:0019222	regulation of metabolic process	459	6	Tb927.11.16470,Tb927.3.1920,Tb927.6.1870,Tb927.7.3550,Tb927.7.3740,Tb927.9.12360,	1.3	3.76	4.63	0.0041782152143	0.0678959972324	0.543167977859
GO:0051046	regulation of secretion	2	1	Tb927.3.3850,	50.0	143.63	297.68	0.00695045681774	0.096647969098	0.903559386306
GO:0016043	cellular component organization	368	5	Tb927.1.2340,Tb927.11.12150,Tb927.11.12600,Tb927.3.3850,Tb927.7.3550,	1.4	3.9	4.64	0.00788701986098	0.096647969098	1.0
GO:0006268	DNA unwinding involved in DNA replication	3	1	Tb927.11.12600,	33.3	95.76	148.82	0.0104082428259	0.096647969098	1.0
GO:0032508	DNA duplex unwinding	3	1	Tb927.11.12600,	33.3	95.76	148.82	0.0104082428259	0.096647969098	1.0
GO:0007030	Golgi organization	3	1	Tb927.3.3850,	33.3	95.76	148.82	0.0104082428259	0.096647969098	1.0
GO:0032392	DNA geometric change	3	1	Tb927.11.12600,	33.3	95.76	148.82	0.0104082428259	0.096647969098	1.0
GO:0051049	regulation of transport	4	1	Tb927.3.3850,	25.0	71.82	99.2	0.0138544503917	0.120071903395	1.0
GO:0032879	regulation of localization	5	1	Tb927.3.3850,	20.0	57.45	74.39	0.0172891167397	0.135496921415	1.0
GO:0071840	cellular component organization or biogenesis	451	5	Tb927.1.2340,Tb927.11.12150,Tb927.11.12600,Tb927.3.3850,Tb927.7.3550,	1.1	3.18	3.74	0.0179835450622	0.135496921415	1.0
GO:0006996	organelle organization	299	4	Tb927.1.2340,Tb927.11.12150,Tb927.11.12600,Tb927.3.3850,	1.3	3.84	4.41	0.0187611121959	0.135496921415	1.0
GO:0010256	endomembrane system organization	9	1	Tb927.3.3850,	11.1	31.92	37.17	0.0309131104447	0.211510755674	1.0
GO:0009405	pathogenesis	11	1	Tb927.10.8940,	9.1	26.12	29.73	0.0376568194356	0.213260995789	1.0
GO:0048856	anatomical structure development	12	1	Tb927.7.3550,	8.3	23.94	27.03	0.0410117299594	0.213260995789	1.0
GO:0009653	anatomical structure morphogenesis	12	1	Tb927.7.3550,	8.3	23.94	27.03	0.0410117299594	0.213260995789	1.0
GO:0032989	cellular component morphogenesis	12	1	Tb927.7.3550,	8.3	23.94	27.03	0.0410117299594	0.213260995789	1.0
GO:0070972	protein localization to endoplasmic reticulum	12	1	Tb927.3.3850,	8.3	23.94	27.03	0.0410117299594	0.213260995789	1.0
GO:0000902	cell morphogenesis	12	1	Tb927.7.3550,	8.3	23.94	27.03	0.0410117299594	0.213260995789	1.0
GO:0006888	ER to Golgi vesicle-mediated transport	13	1	Tb927.3.3850,	7.7	22.1	24.77	0.0443553929637	0.213530391609	1.0
GO:0070727	cellular macromolecule localization	99	2	Tb927.10.8940,Tb927.3.3850,	2.0	5.8	6.31	0.0459911612697	0.213530391609	1.0
GO:0034613	cellular protein localization	99	2	Tb927.10.8940,Tb927.3.3850,	2.0	5.8	6.31	0.0459911612697	0.213530391609	1.0
