# Supplementary material for: An atypical DYRK kinase connects quorum-sensing with posttranscriptional gene regulation in Trypanosoma brucei
Source: eLife. 2020 Mar 26;9:e51620. doi: 10.7554/eLife.51620 (PMC7136023; doi:10.7554/eLife.51620)
Supplement: Supplementary file 4. — Green colour indicates the statically significant protein/peptides (p-value<0.05). [file elife-51620-supp4.xlsx]

## Sheet: CommonProtBothData_|FC|>1.5
[Gene ID]	[Product Description]	[UniProt ID]
Tb927.1.2100	Calpain-like protein 1.1	Q4GZ11
Tb927.1.3880	Fusaric acid resistance protein-like, putative	Q4GYI9
Tb927.1.3910	Anaphase-promoting complex subunit CDC23	Q4GYI6
Tb927.1.4280	hypothetical protein, conserved	Q4GYF0
Tb927.10.12820	hypothetical protein, conserved	Q388W4
Tb927.10.14480	hypothetical protein, conserved	Q388F4
Tb927.10.14700	hypothetical protein, conserved	Q388D4
Tb927.10.2880	Voltage-dependent calcium channel subunit, putative	Q38BV7
Tb927.10.2930	hypothetical protein, conserved	Q38BV2
Tb927.10.460	NIMA-related protein kinase	Q38CJ2
Tb927.11.11860	leucine-rich repeat protein (LRRP), putative	Q382Z5
Tb927.11.15140	bilobe region protein, putative	Q381S1
Tb927.11.16470	SUMO-interacting motif-containing protein	Q381D9
Tb927.11.16660	Dopey, N-terminal, putative	Q381C0
Tb927.11.2140	cyclic nucleotide-binding domain containing protein, putative	Q386U5
Tb927.11.3490	hypothetical protein, conserved	Q386G2
Tb927.11.4030	hypothetical protein, conserved	Q386B1
Tb927.11.8950	leucine rich repeat	Q384D3
Tb927.2.4550	2'-O-ribose RNA methyltransferase SPB1 homolog	Q586Q7
Tb927.2.5760	Flagellar Member 8	Q586D0
Tb927.3.1030	RNA-binding protein	Q57WY6
Tb927.3.1920	General negative regulator of transcription subunit 5	Q57ZB9
Tb927.3.3850	COPII coat assembly protein sec16	Q57WC1
Tb927.3.5020	Flagellar Member 6	Q582N5
Tb927.4.2750	hypothetical protein, conserved	D6XFL1
Tb927.5.570	hypothetical protein, conserved	Q57VV6
Tb927.7.2650	hypothetical protein, conserved	Q57XK9
Tb927.7.2660	zinc finger protein family member, putative	Q57XK8
Tb927.7.3550	cytoskeleton associated protein, putative	Q57WH0
Tb927.7.3740	SUMO-interacting motif-containing protein	Q57WI9
Tb927.7.3980	tc40 antigen-like	Q57UM8
Tb927.7.5340	cAMP response protein 3	Q57ZF5
Tb927.7.5940	Protein Associated with Differentiation	Q582K9
Tb927.7.6640	hypothetical protein, conserved	Q57Y65
Tb927.8.1290	SUMO-interacting motif-containing protein	Q57VM6
Tb927.8.1590	ubiquitin-protein ligase, putative	Q580G4
Tb927.8.2620	SUMO-interacting motif-containing protein	Q57XC7
Tb927.8.3680	kinetoplastid kinetochore protein 4	Q580Y8
Tb927.8.5710	recombination initiation protein NBS1, putative	Q57X11
Tb927.9.10790	hypothetical protein	Q38DU1
Tb927.9.12360	RNA-binding protein, putative	Q38DG9
Tb927.9.1750	Fibronectin type III domain containing protein, putative	Q38FX4
Tb927.9.2760	EB1-like C-terminal motif containing protein, putative	Q38FP4
Tb927.9.6920	hypothetical protein, conserved	Q38EP6
Tb927.9.9690	hypothetical protein, conserved	Q38E28

## Sheet: CommonPeptideBothData_|FC|>1.5
accession	description	pResidue	log2FC.KOvsNM	stat.KOvsNM	log2FC.NMvsH866A	stat.NMvsH866A
Tb927.11.11860	leucine-rich repeat protein (LRRP), putative	S359	0.647503	0.0240385	0.850375	0.0893279
Tb927.11.16660	Dopey, N-terminal, putative	S1358	0.607727	0.078287	0.674688	0.352849
Tb927.2.5760	Flagellar Member 8	S531	0.665248	0.0216674	0.716258	0.341738
Tb927.3.1030	RNA-binding protein	S244	-0.901064	0.0127573	0.883699	0.621244
Tb927.3.1920	General negative regulator of transcription subunit 5	S395	-0.591052	0.0137898	0.733634	0.0221077
Tb927.7.3550	cytoskeleton associated protein, putative	S1048	0.587894	0.0127573	0.740167	0.0480692
Tb927.7.5940	Protein Associated with Differentiation	S324	-1.27577	0.0127573	5.51249	0.119474
Tb927.8.1290	hypothetical protein, conserved	T195	-0.699852	0.025181	0.742579	0.451544
