# Supplementary material for: An atypical DYRK kinase connects quorum-sensing with posttranscriptional gene regulation in Trypanosoma brucei
Source: eLife. 2020 Mar 26;9:e51620. doi: 10.7554/eLife.51620 (PMC7136023; doi:10.7554/eLife.51620)
Supplement: Supplementary file 5. — Sheet 1, p-values for the kinase activity assay. Sheet 2, p-values for the RT-qPCR analysis, upper table comparing the expression level of the gene TbDYRK and the lower table the YFP gene. Statistic calculation were performed using a pairwise t-test, considering non-equal variances, and apply the holm correction. [file elife-51620-supp5.xlsx]

## Sheet: KinaseAssay
	NM	T76A	S77A	S472A	K592A	S856A	S856G	H866A	Y868F	H866A_Y868F	DeltaInsertI	DeltaInsertII
T76A	1.50408e-09	NA	NA	NA	NA	NA	NA	NA	NA	NA	NA	NA
S77A	1.04167e-09	1	NA	NA	NA	NA	NA	NA	NA	NA	NA	NA		Pairwise t test
S472A	5.10154e-11	1	1	NA	NA	NA	NA	NA	NA	NA	NA	NA		p.value correction holm
K592A	2.88842e-05	0.0163249	0.0117922	0.00743321	NA	NA	NA	NA	NA	NA	NA	NA		variances non equal
S856A	0.00378494	9.49431e-06	6.27021e-06	9.83921e-07	0.791866	NA	NA	NA	NA	NA	NA	NA
S856G	4.91419e-10	1	1	1	0.0668207	1.32159e-05	NA	NA	NA	NA	NA	NA
H866A	8.33834e-11	1	1	1	0.0120918	1.74868e-06	1	NA	NA	NA	NA	NA
Y868F	2.28518e-10	1	1	1	0.0322457	5.6488e-06	1	1	NA	NA	NA	NA
H866A_Y868F	1.89377e-09	1	1	1	0.230053	6.22877e-05	1	1	1	NA	NA	NA
DeltaInsertI	4.50828e-11	1	1	1	0.00655632	8.50899e-07	1	1	1	1	NA	NA
DeltaInsertII	2.20478e-11	1	1	1	0.00311818	3.66855e-07	1	1	1	1	1	NA
DeltaInsertIII	1.04214e-10	1	1	1	0.0151046	2.2687e-06	1	1	1	1	1	1

## Sheet: RT-qPCR
	WT	KO	NM	T76A	S77A	S472A	K592A	S856A	S856G	H866A	Y868F	H866A_Y868F	DeltaInsert1	DeltaInsert2
KO	1.40231e-08	NA	NA	NA	NA	NA	NA	NA	NA	NA	NA	NA	NA	NA
NM	8.89109e-05	0.000289023	NA	NA	NA	NA	NA	NA	NA	NA	NA	NA	NA	NA		TbDYRK
T76A	0.545415	0.000755457	1	NA	NA	NA	NA	NA	NA	NA	NA	NA	NA	NA
S77A	1	1.78855e-05	0.247577	1	NA	NA	NA	NA	NA	NA	NA	NA	NA	NA		Pairwise t test
S472A	9.76723e-10	1.84725e-14	1.40523e-13	1.00721e-08	5.81298e-07	NA	NA	NA	NA	NA	NA	NA	NA	NA		p.value correction holm
K592A	0.00327713	1.24858e-10	6.72552e-08	0.00051724	0.0288282	0.00589379	NA	NA	NA	NA	NA	NA	NA	NA		variances non equal
S856A	1	1.64255e-07	0.00125111	0.160951	1	0.000100367	1	NA	NA	NA	NA	NA	NA	NA
S856G	0.00025515	0.313134	1	0.53665	0.0285109	1.24238e-11	2.91628e-07	0.000320074	NA	NA	NA	NA	NA	NA
H866A	3.16072e-05	6.90879e-12	8.3156e-10	1.82103e-05	0.00107135	0.160951	1	0.119491	1.08267e-08	NA	NA	NA	NA	NA
Y868F	0.13242	0.000363839	1	1	1	3.162e-10	4.78046e-05	0.0512428	0.53665	1.00157e-06	NA	NA	NA	NA
H866A_Y868F	3.56704e-11	2.90173e-15	2.67302e-14	2.62171e-10	8.8674e-09	0.53665	2.78106e-05	8.03058e-07	8.31146e-13	0.000767681	1.3061e-11	NA	NA	NA
DeltaInsert1	4.16041e-17	3.73475e-19	2.30967e-19	3.36367e-15	5.37919e-14	2.79133e-07	1.19646e-11	2.03921e-12	3.51068e-17	2.23582e-10	1.27419e-16	0.000912944	NA	NA
DeltaInsert2	1	3.02054e-08	0.000242555	0.126204	1	8.46397e-06	0.545415	1	0.000118158	0.0302347	0.0294555	6.94856e-08	9.94724e-14	NA
DeltaInsert3	0.0294555	1.7316e-09	3.04712e-06	0.00232517	0.0782642	0.0157094	1	1	2.70607e-06	1	0.000375331	0.000100367	1.14045e-10	1
	WT	KO	NM	T76A	S77A	S472A	K592A	S856A	S856G	H866A	Y868F	H866A_Y868F	DeltaInsert1	DeltaInsert2
KO	1	NA	NA	NA	NA	NA	NA	NA	NA	NA	NA	NA	NA	NA
NM	7.52381e-14	5.39175e-06	NA	NA	NA	NA	NA	NA	NA	NA	NA	NA	NA	NA		YFP
T76A	1.89172e-18	3.93113e-14	9.60361e-12	NA	NA	NA	NA	NA	NA	NA	NA	NA	NA	NA
S77A	1.8693e-18	3.90682e-14	9.49866e-12	1	NA	NA	NA	NA	NA	NA	NA	NA	NA	NA		Pairwise t test
S472A	3.60349e-27	8.17866e-23	2.23649e-23	1.95303e-12	1.96398e-12	NA	NA	NA	NA	NA	NA	NA	NA	NA		p.value correction holm
K592A	7.44244e-16	1.1302e-11	5.94567e-08	0.270274	0.270274	7.99674e-15	NA	NA	NA	NA	NA	NA	NA	NA		variances non equal
S856A	7.15189e-24	2.44763e-18	4.13339e-18	0.0137207	0.0137207	1.45259e-09	3.55565e-06	NA	NA	NA	NA	NA	NA	NA
S856G	0.201532	1	6.90182e-06	1.75177e-14	1.73468e-14	1.14837e-23	7.93655e-12	3.22322e-19	NA	NA	NA	NA	NA	NA
H866A	8.93696e-21	2.34611e-16	6.71083e-15	0.270274	0.270274	1.22032e-09	0.000277374	1	6.83023e-17	NA	NA	NA	NA	NA
Y868F	0.100668	1	1.60985e-05	2.57574e-14	2.55257e-14	1.47598e-23	1.1815e-11	4.67269e-19	1	9.85592e-17	NA	NA	NA	NA
H866A_Y868F	1.33e-30	4.15585e-25	5.44715e-27	3.09502e-15	3.12575e-15	0.948404	1.55858e-17	5.91213e-13	2.48965e-26	1.34082e-12	3.1581e-26	NA	NA	NA
DeltaInsert1	7.1828e-27	1.66233e-22	5.32621e-23	6.69648e-12	6.72689e-12	1	2.38773e-14	7.12356e-09	2.35189e-23	5.15813e-09	3.03772e-23	0.274673	NA	NA
DeltaInsert2	1.94623e-18	4.02017e-14	9.94153e-12	1	1	1.90677e-12	0.270274	0.013547	1.80018e-14	0.270274	2.6453e-14	3.01258e-15	6.54107e-12	NA
DeltaInsert3	1.11095e-21	3.8499e-16	5.96393e-15	1	1	1.53539e-12	0.0137207	0.0857957	7.08327e-17	1	1.07103e-16	8.90638e-16	5.94922e-12	1
